# Supplementary material for: The self-assembly of cystine-bridged γ-peptide-based cyclic peptide–dendron hybrids
Source: Royal Society of Chemistry journal article supplement (doi:10.1039/c3ob40532j), 2013-01-01
Supplement: c3ob40532j.pdf [file c3ob40532j.pdf]

## SUPPORTING INFORMATION

# The Self-Assembly of Cystine-Bridged $\gamma$ -Peptide-Based Cyclic Peptide-Dendron Hybrids

Zhizhong Lin,<sup>a, d</sup> Liangchun Li,<sup>\*, c</sup> Yujin Yang,<sup>a</sup> Hongmei Zhan,<sup>a</sup> Yu Hu,<sup>a</sup> Zhiming Zhou,<sup>c</sup> Jin Zhu,<sup>a</sup>  
Qiwei Wang,<sup>a</sup> Jingen Deng<sup>\*, a, b</sup>

<sup>a</sup>Chengdu Institute of Organic Chemistry, Chinese Academy of Sciences, Chengdu 610041, China;

<sup>b</sup>Key Laboratory of Drug-Targeting of Education Ministry, West China School of Pharmacy, Sichuan University, Chengdu 610041, China;

<sup>c</sup>School of Life Science and Engineering, Southwest University of Science and Technology, Mianyang, 621010, China;

<sup>d</sup>University of Chinese Academy of Sciences, Beijing, 100049, China.

## Contents:

|                                                                                                                                                                              |    |
|------------------------------------------------------------------------------------------------------------------------------------------------------------------------------|----|
| 1. General Methods, Instrument Details and Materials: .....                                                                                                                  | 2  |
| 2. Synthesis of Cyclic Peptide-Dendron Hybrids <b>1a</b> and <b>1b</b> and Intermolecular<br>Hydrogen-Bonding Model of the Cyclic Peptide of <b>1a</b> and <b>1b</b> : ..... | 4  |
| 3. Preparation of Peptide Single Crystals for SEM: .....                                                                                                                     | 12 |
| 4. Preparation of Cyclic Peptide Nanotubes and Nanofibers for TEM Analysis: .....                                                                                            | 12 |
| 5. FT-IR, SEM and AFM Results: .....                                                                                                                                         | 13 |
| 6. NMR Researches: .....                                                                                                                                                     | 18 |
| 7. MALDI-TOF and HPLC Results: .....                                                                                                                                         | 21 |
| 8. Spectral Data: .....                                                                                                                                                      | 24 |
| 9. References: .....                                                                                                                                                         | 46 |

## 1. General Methods, Instrument Details and Materials:

(1*R*,3*S*)-3-aminocyclohexanecarboxylic acid ( $\gamma$ -Ach) was prepared according to our method.<sup>1</sup> O-(7-azabenzotriazol-1-yl)-1, 1, 3, 3-tetramethyluronium hexafluorophosphate (HATU), 1-Hydroxy-7-azabenzotriazole (HOAT), 1-Hydroxybenzotriazole (HOBt) and N-(3-dimethylaminopropyl)-N-ethylcarbodiimide hydrochloride (EDCI) were all used as obtained from GL Biochem (Shanghai) Ltd. All other reagents obtained from commercial suppliers were used without further purification unless otherwise noted. Dichloromethane (DCM) was dried and distilled over calcium hydride. Analytical thin-layer chromatography was performed on silica gel GF254 plates from Qingdao Haiyang Chemical Co. Ltd. Silica gel flash chromatography was performed using silica gel (200-300 mesh) from Qingdao Haiyang Chemical Co. Ltd. Melting points were recorded on a BÜCHI Melting Point B-545 apparatus and are uncorrected. Optical rotations were measured with an automatic Perkin-Elmer-341 digital polarimeter; concentrations are given in g/100 mL.

**NMR experiments.** Proton nuclear magnetic resonance (<sup>1</sup>H NMR) spectra were recorded on Bruker WM-300 MHz or 600 MHz spectrometers. Chemical shifts were reported in parts per million (ppm,  $\delta$ ) from TMS or solvent resonance as the internal standard. <sup>1</sup>H NMR splitting patterns are designated as singlet (s), doublet (d), triplet (t), quartet (q). All first-order splitting patterns were assigned on the basis of the appearance of the multiplet. Splitting patterns that could not be easily interpreted are designated as multiplet (m) or broad (br). Carbon nuclear magnetic resonance (<sup>13</sup>C NMR) spectra were recorded on Bruker WM-300 MHz or 600 MHz spectrometers.

**Matrix Assisted Laser Desorption Ionization-Time of Flight (MALDI-TOF)** was obtained on a Bruker Autoflex mass spectrometer.

**Electrospray (ESI) mass spectra** were recorded on a Bruker BioTOF Q mass spectrum.

**FT-IR** measurements were recorded on a Nicolet MX-1 FT-IR spectrometer or Nicolet MAGNA-IR 560 spectrometer as KBr pellets or liquid film. For the solution state, measurements were performed using a NICOLET 6700 FT-IR Spectrometer. The CHCl<sub>3</sub>, CH<sub>3</sub>CN solution FT-IR measurements placed in a 0.1 mm of KBr solution IR cell and for the D<sub>2</sub>O solution, measurements were performed in CaF<sub>2</sub> cell.

**Scanning Electron Microscopy (SEM):** The sample was placed on a piece of silicon wafers, attached to a stub via carbon tape and coated with ~10 nm of gold. Sample was analyzed using JSM-5900LV at an accelerating voltage of 5 kV.

**Transmission Electron Microscopy (TEM):** After the sample for TEM was prepared, droplets of 10  $\mu$ L of the solution were placed onto the specimen holder, a 200 mesh copper grid. After 2 min., the grid was stained with 1% (w/v) phosphotungstic acid for 1 min. and the excess fluid was removed. Samples were viewed using a HITACHI H-600 electron microscope for TEM at an accelerating voltage of 75 kV.

**Atom force microscopy (AFM) measurements:** After the gels were dispersed in water or water-ethanol (1:1, v/v) mixture, 10  $\mu$ L of the solution was deposited onto a freshly cleaved piece of

mica and left to adhere for overnight. AFM imaging was performed at room temperature using the tapping mode on a Seiko SPI3800N. According to the manufacturer, the probe used were etched silicon probes with a typical tip radius of < 10 nm, the normal spring constant was 3 N/m. Drive frequency was around 75 kHz.

#### **Analytical HPLC analysis**

Analytic HPLC was carried out on Ultimate 3100 systems coupled to UV detectors and the data were processed using Chromeleon 6.5 software. Analysis of samples was performed using a reversed-phase HPLC column (Acclaim 120 C18, 5  $\mu$ m, 120 Å, 4.6 x 150 mm) at 25 °C with an injection volume of 20  $\mu$ L. All UV traces were obtained by monitoring at 254 nm. The following LC analysis method was used:

Solvent A: Water; Solvent B: methanol

Flow rate: 1.0 mL/min

| Time (min) | B% |
|------------|----|
| 0          | 60 |
| 15         | 60 |
| 15         | 90 |
| 30         | 90 |

## 2. Synthesis of Cyclic Peptide-Dendron Hybrids 1a and 1b and Intermolecular Hydrogen-Bonding Model of the Cyclic Peptide of 1a and 1b:

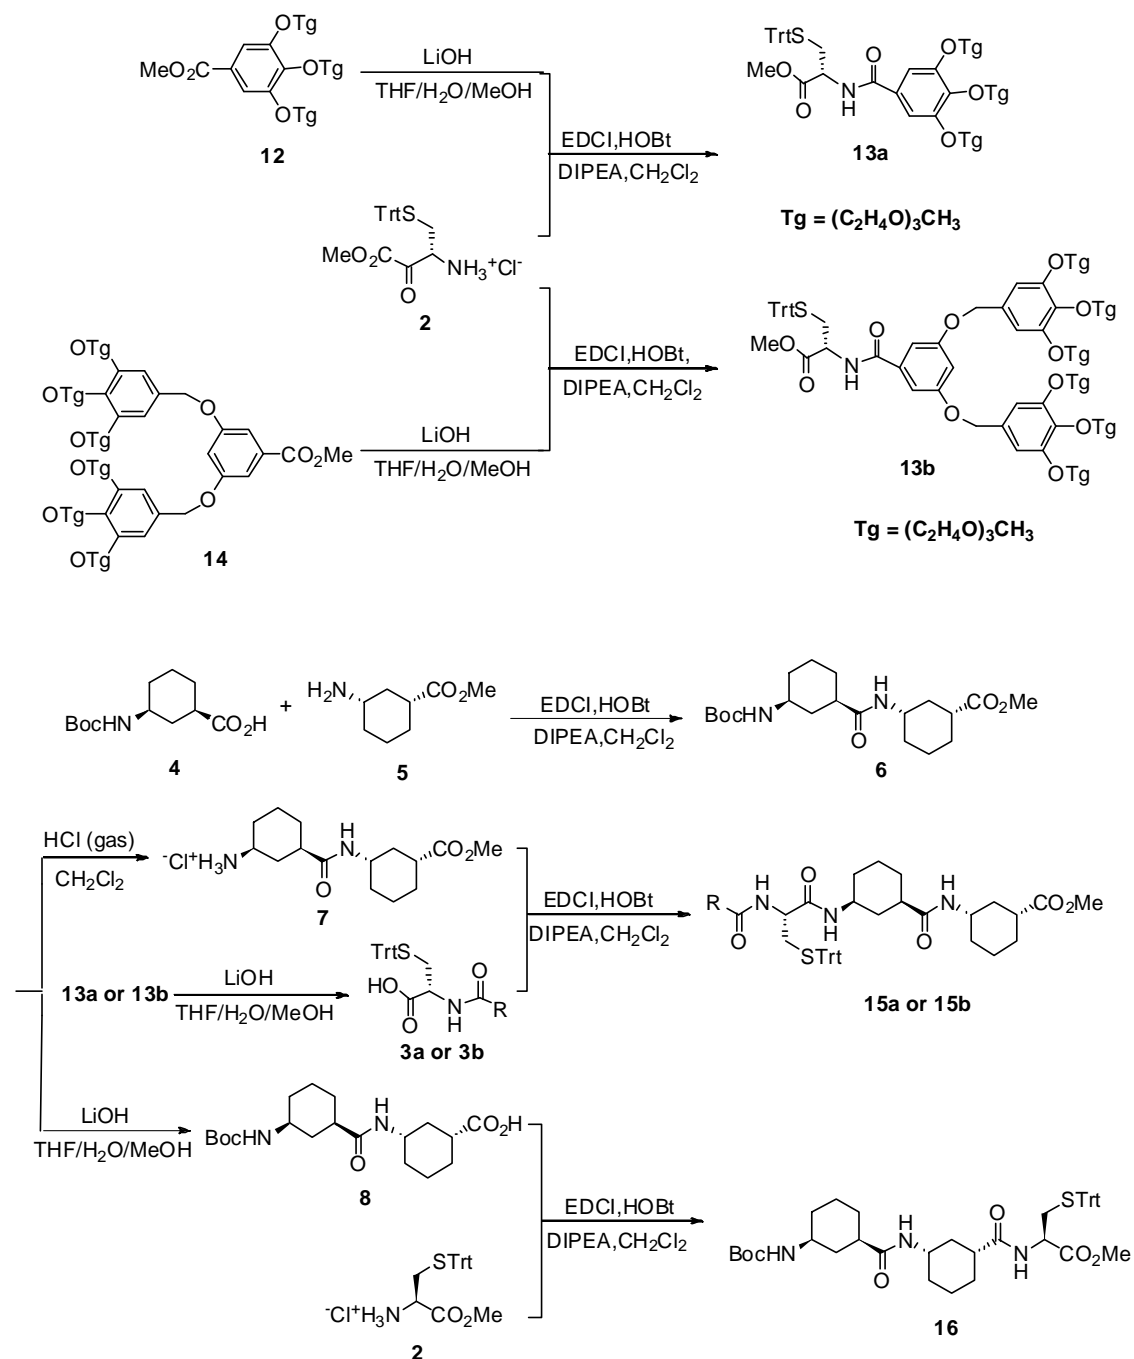

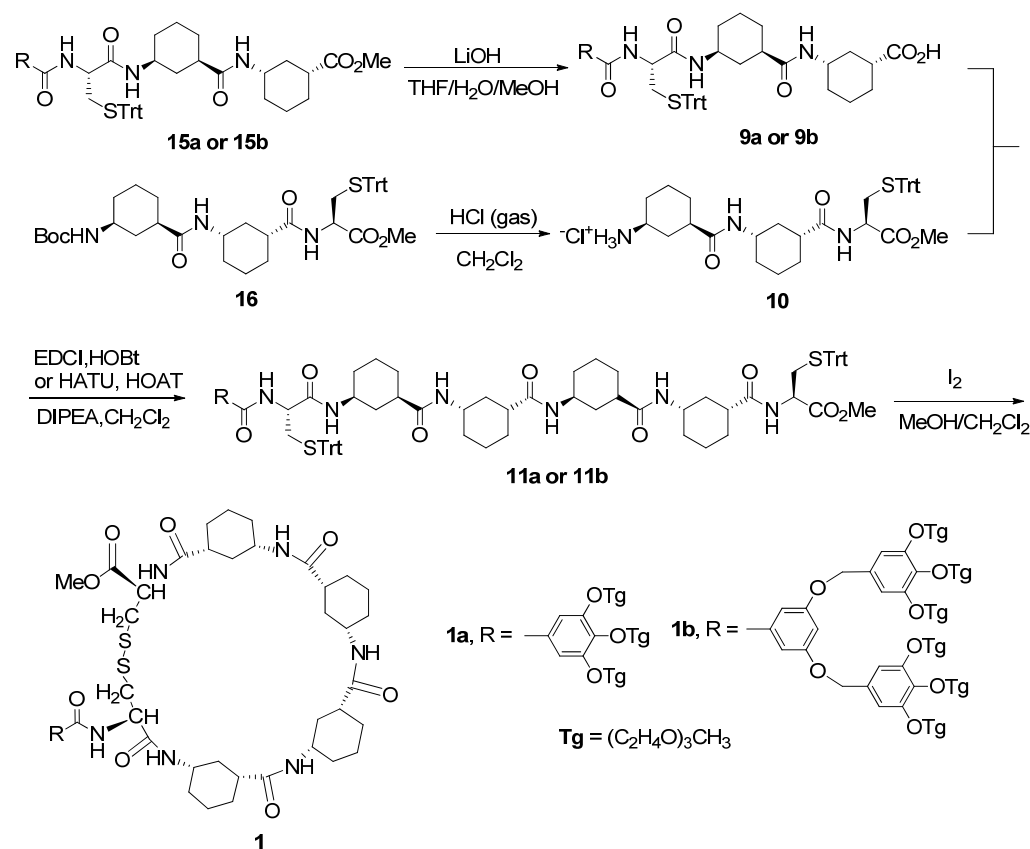

**Scheme S1.** The synthesis of **1a** and **1b**.

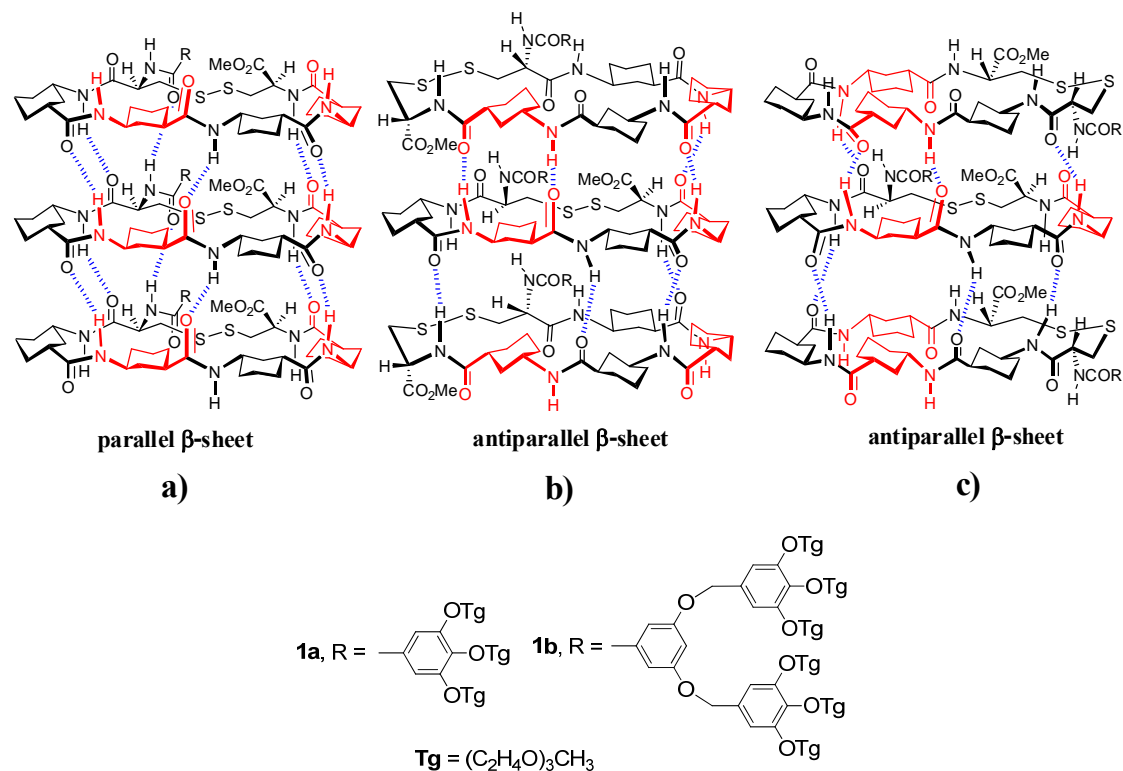

**Figure S1.** The intermolecular hydrogen-bonding model of the cyclic peptide of **1a** and **1b**. a) Parallel β-sheet; b), c) antiparallel β-sheet.

**2.1 (R)-2-(3,4,5-Tri(2-(2-(2-methoxy-ethoxy)-ethoxy)-ethoxy)-benzoylamino)-3-tritylsulfanyl propionic acid methyl ester (3Tg-G<sub>1</sub>-L-Cys(Trt)-OMe, 13a).**

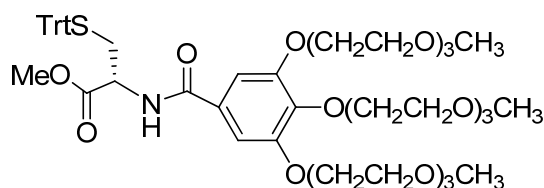

To a solution of benzoate **12**<sup>2</sup> (1.10 g, 1.77 mmol) in THF/H<sub>2</sub>O/MeOH (3:1:1, 90mL) LiOH•H<sub>2</sub>O (0.74 g, 17.7 mmol) was added at 0 °C. After stirred for 2 hours, the reaction mixture was concentrated and diluted by water. The aqueous solution was acidified by HCl (1 M) to pH 2 and extracted with CH<sub>2</sub>Cl<sub>2</sub> (3 × 30 mL). The combined organic layers were dried over Na<sub>2</sub>SO<sub>4</sub> and concentrated to give yellow oil (0.81 g, 76%). To a solution of the oil (0.81 g, 1.3 mmol) and *S*-Trityl-L-cysteine methyl ester hydrochloride **2**<sup>3</sup> (0.44 g, 1.0 mmol) in CH<sub>2</sub>Cl<sub>2</sub> (20 mL), HOBt (0.18 g, 1.3 mmol), EDCI (0.25 g, 1.3 mmol) and DIPEA (0.17 g, 1.3 mmol) were successively added at 0 °C. After stirred at room temperature for 24 hours, the solution was diluted by CH<sub>2</sub>Cl<sub>2</sub> (60 mL) and successively washed with NaHCO<sub>3</sub> (sat.), 1 M HCl and brine. The organic layers were dried over Na<sub>2</sub>SO<sub>4</sub>. After removal of the solvent, the residue was purified by column chromatography on silica gel (CHCl<sub>3</sub>/CH<sub>3</sub>OH = 100:1, v/v) to give **13a** (0.71 g, 77%) as a yellow oil. <sup>1</sup>H NMR (CDCl<sub>3</sub>, 300 MHz, ppm), δ: 2.74 (d, 2H, *J* = 5.3 Hz), 3.35 (s, 6H), 3.36 (s, 3H), 3.52-3.55 (m, 6H), 3.61-3.66 (m, 12H), 3.70-3.72 (m, 9H), 3.78-3.86 (m, 6H), 4.19-4.22 (m, 6H), 4.69-4.75 (m, 1H), 6.71 (d, 1H, *J* = 7.8 Hz), 7.04 (s, 2H), 7.18-7.27 (m, 9H), 7.36-7.38 (m, 6H); <sup>13</sup>C NMR (CDCl<sub>3</sub>, 75 MHz, ppm), δ: 33.76, 51.56, 52.55, 58.85, 69.01, 69.54, 70.36, 70.51, 70.61, 71.75, 72.25, 107.27, 126.73, 127.84, 128.64, 129.32, 141.76, 144.11, 152.37, 166.18, 170.88; FT-IR (v/cm<sup>-1</sup>): 3277, 3058, 2877, 1744, 1661, 1582, 1538, 1494, 1446, 1339, 1245, 1112, 1033, 744, 701; ESI-HRMS, calculated for C<sub>51</sub>H<sub>73</sub>N<sub>2</sub>O<sub>15</sub>S [M+NH<sub>4</sub>]<sup>+</sup>: 985.4732; found 985.4727; [α]<sub>D</sub><sup>20</sup> = -14.1 (c = 0.5, CH<sub>2</sub>Cl<sub>2</sub>).

**2.2 (R)-methyl 2-(3,5-bis(3,4,5-tris(2-(2-(2-methoxyethoxy)ethoxy)ethoxy)benzyloxy)benzamido)-3-tritylthiopropionate (6Tg-G<sub>2</sub>-L-Cys(Trt)-OMe 13b)**

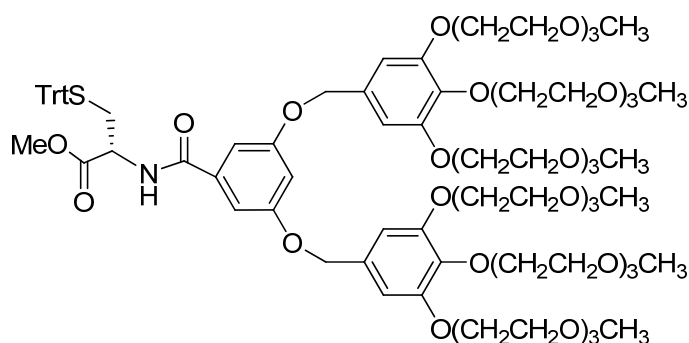

To a solution of methyl ester **14**<sup>2</sup> (5.638 g, 4.26 mmol) in THF/H<sub>2</sub>O/MeOH (3:1:1, 100mL) LiOH•H<sub>2</sub>O (1.789 g, 42.6 mmol) was added at 0 °C. After stirred for overnight, the reaction mixture was concentrated and diluted by water (50 ml). The aqueous solution was acidified by HCl (1 M) to pH 2 and extracted with CH<sub>2</sub>Cl<sub>2</sub> (3 × 80 mL), and washed sequentially with water (2 × 50 mL) and brine (2 × 50 mL). The combined organic layers were dried over Na<sub>2</sub>SO<sub>4</sub>, and concentrated to afford yellow oil (5.904g). To a solution of the oil (5.904 g, 4.26 mmol) and *S*-Trityl-L-cysteine methyl ester hydrochloride **2** (2.132 g, 4.68 mmol) in CH<sub>2</sub>Cl<sub>2</sub> (70 mL), HOBt (632 mg, 4.68 mmol), EDCI (980 mg,

5.11 mmol) and DIPEA (2.20 g, 17.04 mmol) were successively added at 0 °C. After stirred at room temperature for 24 hours, the solution was diluted by CH<sub>2</sub>Cl<sub>2</sub> (250 mL) and successively washed with NaHCO<sub>3</sub> (sat.), 1 M HCl and brine. The organic layers were dried over Na<sub>2</sub>SO<sub>4</sub>. After removal of the solvent, the residue was purified by column chromatography on silica gel (CH<sub>2</sub>Cl<sub>2</sub>/MeOH = 40:1, v/v) to give **13b** as yellow oil (4.907 g, 69%). <sup>1</sup>H NMR (CDCl<sub>3</sub>, 300 MHz, ppm), δ: 2.74 (d, 2H, *J* = 5.2 Hz), 3.35, 3.36 (2 × s, 18H), 3.52-3.55 (m, 12H), 3.61-3.66 (m, 24H), 3.70-3.72 (m, 15H), 3.77-3.85 (m, 12H), 4.13-4.18 (m, 12H), 4.72-4.78 (m, 1H), 4.94 (s, 4H), 6.67 (s, 4H), 6.74 (s, 1H), 6.99 (s, 1H), 7.00 (s, 1H), 7.15-7.26 (m, 9H), 7.35-7.38 (m, 6H); <sup>13</sup>C NMR (CDCl<sub>3</sub>, 75 MHz, ppm), δ: 33.65, 51.36, 52.46, 58.72, 66.70, 68.66, 69.45, 70.14, 70.26, 70.41, 70.53, 71.64, 71.67, 72.05, 104.95, 106.06, 107.04, 126.63, 127.74, 129.18, 131.44, 135.63, 138.05, 143.98, 152.57, 159.66, 166.18, 170.60; FT-IR (ν/cm<sup>-1</sup>): 3523, 3342, 2876, 1745, 1660, 1593, 1550, 1439, 1113, 851, 746, 703; ESI-HRMS, calculated for C<sub>86</sub>H<sub>123</sub>NNa<sub>2</sub>O<sub>29</sub>S [M+2Na]<sup>2+</sup>: 855.8839; found 855.8855; [α]<sub>D</sub><sup>20</sup> = -6.5 (c = 0.5, CH<sub>2</sub>Cl<sub>2</sub>).

### 2.3 (1*R*,3*S*)-methyl 3-((1*R*,3*S*)-3-(tert-butoxycarbonylamino)cyclohexanecarboxamido)-cyclohexanecarboxylate (Boc-(γ-Ach)<sub>2</sub>-CO<sub>2</sub>Me **6**)

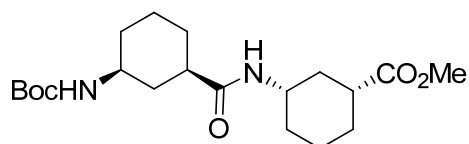

To a solution of (1*R*,3*S*)-Boc-3-aminocyclohexanecarboxylic acid (Boc-γ-Ach-OH) **4** (200 mg, 0.83 mmol) and methyl (1*R*,3*S*)-3-aminocyclohexanecarboxylate (H-γ-Ach-OMe) **5** (189 mg, 0.83 mmol) in CH<sub>2</sub>Cl<sub>2</sub> (20 mL), HOBT (114 mg, 0.85 mmol), EDCI (163 mg, 0.85 mmol) and DIPEA (212 mg, 1.6 mmol) were successively added at 0 °C and stirred at room temperature for 24 hours. After removal of the solvent in vacuo, the residue was dissolved in CHCl<sub>3</sub> (60 mL) and washed with NaHCO<sub>3</sub> (sat.), 1 M HCl and brine. The organic layers were dried over Na<sub>2</sub>SO<sub>4</sub> and concentrated under reduced pressure. The residue was purified by column chromatography on silica gel (CHCl<sub>3</sub>/CH<sub>3</sub>OH = 100:1, v/v) to give **6** (269 mg, 93%) as a white solid. Mp: 214-216 °C; <sup>1</sup>H NMR (CDCl<sub>3</sub>, 300 MHz, ppm), δ: 1.08-1.12 (m, 2H), 1.20-1.37 (m, 6H), 1.43 (s, 9H), 1.75-1.95 (m, 6H), 2.05-2.20 (m, 3H), 2.39-2.47 (m, 1H), 3.44 (brs, 1H), 3.66 (s, 3H), 3.75-3.79 (m, 1H), 4.46 (d, 1H, NH, *J* = 7.2 Hz), 5.38 (d, 1H, NH, *J* = 7.9 Hz). <sup>13</sup>C NMR (CDCl<sub>3</sub>, 75 MHz, ppm), δ: 23.85, 24.18, 28.05, 28.24, 28.48, 32.10, 32.37, 34.85, 36.03, 41.82, 44.18, 46.97, 48.91, 51.48, 78.89, 155.07, 174.00, 175.38. FT-IR (ν/cm<sup>-1</sup>): 3445, 3343, 3301, 2935, 2858, 1732, 1680, 1637, 1533, 1438, 1365, 1311, 1276, 1175, 1140, 1052; ESI-HRMS, calculated for C<sub>20</sub>H<sub>34</sub>N<sub>2</sub>O<sub>5</sub> [M+H]<sup>+</sup>: 383.2540; found 383.2547; [α]<sub>D</sub><sup>20</sup> = -61 (c = 0.5, MeOH).

### 2.4 3Tg-G<sub>1</sub>-L-Cys(Trt)-(γ-Ach)<sub>2</sub>-OMe (**15a**)

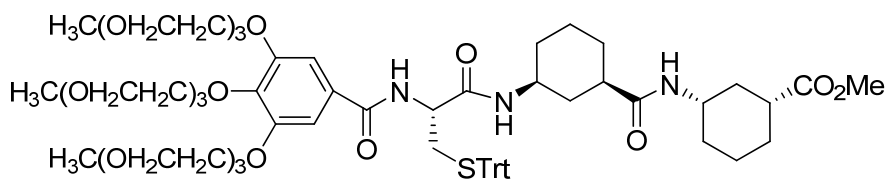

Boc-(γ-Ach)<sub>2</sub>-OMe **6** (118 mg, 0.31 mmol) was dissolved in CH<sub>2</sub>Cl<sub>2</sub> (10 mL), and then HCl gas was introduced over a period of 2 hour. The mixture was stirred for 4 hours at room temperature. The solution was concentrated under reduced pressure, and then added CH<sub>2</sub>Cl<sub>2</sub> (2 mL) and removed the

solvents. After repetitive operation three times, the compound of **7** (110 mg, 0.31 mmol) was afforded as a white solid.

To a solution of methyl ester **13a** (300 mg, 0.31 mmol) in THF/H<sub>2</sub>O/MeOH (2:1:1, 20 mL) LiOH•H<sub>2</sub>O (126 mg, 3 mmol) was added at 0 °C. After stirred for 2 hours, the reaction mixture was concentrated and diluted by water. The aqueous solution was acidified by HCl (1 M) to pH 2 and extracted with CHCl<sub>3</sub> (3 × 30 mL). The combined organic layers were dried over MgSO<sub>4</sub>, and concentrated to give **3a** as yellow oil (287 mg, 97%). To a solution of the yellow oil **3a** (287 mg, 0.31 mmol) and **7** (110 mg, 0.31 mmol) in CH<sub>2</sub>Cl<sub>2</sub> (20 mL), HOBT (42 mg, 0.31 mmol), EDCI (60 mg, 0.31 mmol) and DIPEA (80 mg, 0.63 mmol) were successively added at 0 °C, and the mixture was stirred at room temperature for 24 hours. After removal of the solvent under reduced pressure, the residue was dissolved in CHCl<sub>3</sub> (50 mL) and washed with NaHCO<sub>3</sub>(sat.), 1 M HCl and brine. The organic layers were dried over Na<sub>2</sub>SO<sub>4</sub> and concentrated under reduced pressure. The residue was purified by column chromatography on silica gel (CHCl<sub>3</sub>/CH<sub>3</sub>OH = 50:1, v/v) to give **15a** (241 mg, 66%) as a white semisolid. <sup>1</sup>H NMR (CDCl<sub>3</sub>, 600 MHz, ppm), δ: 1.03-1.38 (m, 8H), 1.73-2.15 (m, 9H), 2.38-2.42 (m, 1H), 2.58-2.61 (m, 1H), 2.74-2.76 (m, 1H), 3.34 (s, 6H), 3.36 (s, 3H), 3.50-3.53 (m, 6H), 3.61-3.73 (m, 23H), 3.77-3.83 (m, 6H), 4.14-4.19 (m, 7H), 5.51 (d, 1H, *J* = 8.0 Hz), 6.09, 6.12 (2 × d, 1H, *J* = 8.3, 8.0 Hz), 6.87 (d, 1H, *J* = 7.6 Hz), 7.02 (s, 2H), 7.18-7.20 (m, 3H), 7.24-7.26 (m, 6H), 7.38-7.40 (m, 6H); <sup>13</sup>C NMR (CDCl<sub>3</sub>, 75 MHz, ppm), δ: 23.87, 28.13, 28.49, 31.94, 32.23, 33.86, 34.91, 35.11, 41.88, 44.08, 47.17, 47.93, 51.55, 52.82, 58.84, 67.03, 69.07, 69.61, 70.37, 70.41, 70.44, 70.54, 70.57, 70.63, 71.83, 71.85, 72.33, 107.36, 126.76, 127.95, 128.62, 129.48, 141.76, 144.37, 152.41, 166.48, 169.20, 173.76, 175.38; FT-IR (ν/cm<sup>-1</sup>): 3440, 3285, 3076, 2932, 2860, 1731, 1635, 1580, 1544, 1493, 1337, 1215, 1109, 1036, 743, 700; ESI-HRMS, calculated for C<sub>65</sub>H<sub>95</sub>N<sub>4</sub>O<sub>17</sub>S [M+NH<sub>4</sub>]<sup>+</sup>: 1235.6413; found 1235.6427; [α]<sub>D</sub><sup>20</sup> = -16 (c = 0.2, CH<sub>2</sub>Cl<sub>2</sub>).

## 2.5 6Tg-G<sub>2</sub>- L-Cys(Trt)-(γ-Ach)<sub>2</sub>-CO<sub>2</sub>Me (**15b**)

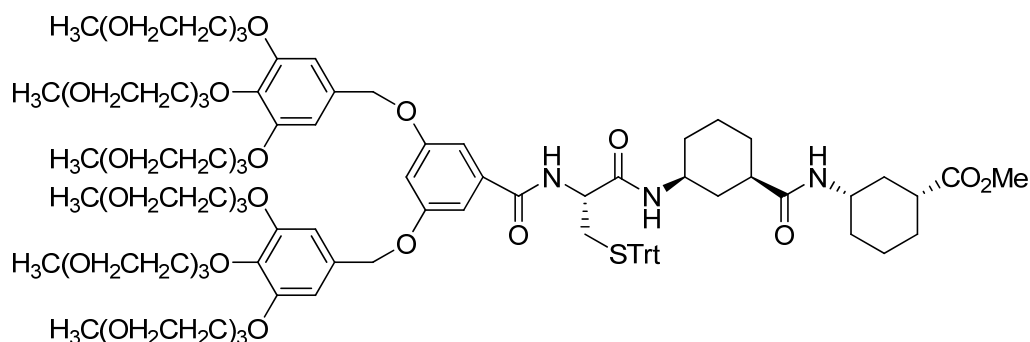

Boc-(γ-Ach)<sub>2</sub>-CO<sub>2</sub>Me **6** (115 mg, 0.3 mmol) was dissolved in CH<sub>2</sub>Cl<sub>2</sub> (10 mL), and then HCl gas was introduced over a period of 2 hours. The mixture was stirred for 4 hours at room temperature. The solution was concentrated under reduced pressure, and then added CH<sub>2</sub>Cl<sub>2</sub> (5mL) and removed the solvents, afforded **7** as a white solid (95 mg, 0.3 mmol).

To a solution of methyl ester **13b** (500 mg, 0.3 mmol) in THF/H<sub>2</sub>O/MeOH (3:1:1, 50mL) LiOH•H<sub>2</sub>O (126 mg, 3 mmol) was added at 0 °C. After stirred for 5 hours, the reaction mixture was concentrated and diluted by water (10 mL). The aqueous solution was acidified by HCl (1 M) to pH 2 and extracted with CH<sub>2</sub>Cl<sub>2</sub> (3 × 30 mL). The combined organic layers were dried over Na<sub>2</sub>SO<sub>4</sub>, and concentrated to give **3b** as yellow oil (609 mg). To a solution of the yellow oil **3b** (490 mg, 0.3 mmol) and **7** (105 mg, 0.3 mmol) in CH<sub>2</sub>Cl<sub>2</sub> (20 mL), HATU (136.8 mg, 0.36 mmol), HOAT (52.8 mg, 0.33

mmol) and DIPEA (154.8 mg, 1.2 mmol) were successively added at 0 °C, and the mixture was stirred at room temperature for 34 hours, the solution was diluted by CH<sub>2</sub>Cl<sub>2</sub> (50 mL) and successively washed with NaHCO<sub>3</sub> (sat.) (2 × 25 mL), 1 M HCl (2 × 25 mL), water (1 × 25 mL) and brine (1 × 25 mL). The organic layers were dried over anhydrous Na<sub>2</sub>SO<sub>4</sub>. After removal of the solvent, the residue was purified by column chromatography on silica gel (CH<sub>2</sub>Cl<sub>2</sub>/MeOH = 40:1, v/v) to give **15b** as a yellow semisolid (328 mg, 57%). <sup>1</sup>H NMR (CDCl<sub>3</sub>, 600 MHz, ppm), δ: 0.98-1.36 (m, 8H), 1.72-2.14 (m, 9H), 2.36-2.39 (m, 1H), 2.57-2.60 (m, 1H), 2.67-2.71 (m, 1H), 3.31, 3.33 (2 × s, 18H), 3.48-3.51 (m, 12H), 3.59-3.63 (m, 28H), 3.68-3.70 (m, 13H), 3.75-3.81 (m, 12H), 4.10-4.13 (m, 12H), 4.22-4.24 (m, 1H), 4.88 (s, 4H), 5.62, 5.68 (2 × d, 1H, *J* = 7.8, 7.9 Hz), 6.31, 6.38 (2 × d, 1H, *J* = 4.7, 5.5 Hz), 6.62 (s, 4H), 6.68 (s, 1H), 6.84, 6.91 (2 × d, 1H, *J* = 7.1, 7.7 Hz), 6.94, 6.98 (2 × s, 2H), 7.12-7.23 (m, 9H), 7.34-7.38 (m, 6H); <sup>13</sup>C NMR (CDCl<sub>3</sub>, 150 MHz, ppm), δ: 23.95, 28.21, 28.57, 31.92, 32.28, 34.18, 34.96, 35.53, 41.94, 44.13, 47.24, 47.96, 51.65, 52.67, 58.95, 67.02, 68.90, 69.70, 70.37, 70.48, 70.63, 71.76, 71.89, 72.30, 105.33, 106.27, 107.28, 126.83, 128.03, 129.51, 131.75, 135.89, 138.25, 144.37, 152.76, 159.90, 166.67, 169.05, 173.91, 175.46; FT-IR (ν/cm<sup>-1</sup>): 3507, 3279, 3058, 2934, 2876, 1727, 1636, 1593, 1550, 1440, 1351, 1334, 1252, 1114, 851, 702; ESI-HRMS, calculated for C<sub>100</sub>H<sub>145</sub>N<sub>3</sub>Na<sub>2</sub>O<sub>31</sub>S [M+2Na]<sup>2+</sup>: 980.9689; found 980.9684; [α]<sub>D</sub><sup>20</sup> = -16 (c = 0.2, CH<sub>2</sub>Cl<sub>2</sub>).

## 2.6 Boc-(γ-Ach)<sub>2</sub>-L-Cys(Trt)-CO<sub>2</sub>Me (**16**)

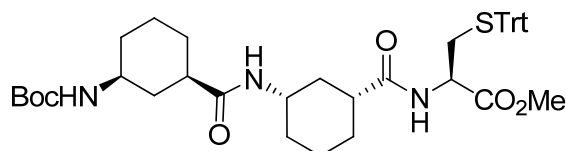

To a solution of Boc-(γ-Ach)<sub>2</sub>-OMe **6** (118 mg, 0.31 mmol) in THF/H<sub>2</sub>O/MeOH (3:1:1, 20mL) LiOH·H<sub>2</sub>O (126 mg, 3 mmol) was added. After stirred for 2 hours, the reaction mixture was concentrated and diluted by water. The aqueous solution was acidified by HCl (1 M) to pH 2 and extracted with CHCl<sub>3</sub> (3 × 20 mL). The combined organic layers were dried over Na<sub>2</sub>SO<sub>4</sub>, and concentrated to give a white solid **8** (105 mg, 93%). To a solution of **8** (105 mg, 0.28 mmol) and S-Trityl-L-cysteine methyl ester hydrochloride **2** (162 mg, 0.28 mmol) in CH<sub>2</sub>Cl<sub>2</sub> (20 mL), HOBT (39 mg, 0.29 mmol), EDCI (55 mg, 0.29 mmol) and DIPEA (74 mg, 0.51 mmol) were successively added at 0 °C, and the mixture was stirred at room temperature for 24 hours. After removal of the solvent under reduced pressure, the residue was dissolved in CHCl<sub>3</sub> (50 mL) and washed with NaHCO<sub>3</sub> (sat.), 1 M HCl and brine. The organic layers were dried over Na<sub>2</sub>SO<sub>4</sub> and concentrated under reduced pressure. The residue was purified by column chromatography on silica gel (CHCl<sub>3</sub>/CH<sub>3</sub>OH = 100:1, v/v) to give **16** (117 mg, 57%) as a white solid. Mp: 182-184 °C; <sup>1</sup>H NMR (CDCl<sub>3</sub>, 600 MHz, ppm), δ: 0.99-1.05 (m, 2H), 1.19-1.32 (m, 6H), 1.36 (s, 9H), 1.68-2.11 (m, 10H), 2.52 (dd, 1H, *J* = 4.5, 12.5 Hz), 2.61 (dd, 1H, *J* = 5.9, 12.5 Hz), 3.38 (brs, 1H), 3.62 (s, 3H), 3.74-3.76 (m, 1H), 4.40 (brs, 1H), 4.46-4.50 (m, 1H), 5.43 (d, 1H, *J* = 7.9 Hz), 5.76 (d, 1H, *J* = 7.8 Hz), 7.14-7.16 (m, 3H), 7.20-7.23 (m, 6H), 7.31-7.32 (m, 6H); <sup>13</sup>C NMR (CDCl<sub>3</sub>, 75 MHz, ppm), δ: 23.89, 24.28, 28.39, 28.55, 28.65, 32.26, 32.64, 33.63, 35.21, 36.23, 43.65, 44.50, 47.04, 49.06, 50.86, 52.52, 66.94, 76.58, 79.17, 126.88, 127.98, 129.44, 144.23, 155.16, 170.85, 173.89, 174.42; FT-IR (ν/cm<sup>-1</sup>): 3318, 3058, 2934, 2859, 1744, 1679, 1649, 1529, 1445, 1390, 1277, 1172, 1031, 743, 700; ESI-HRMS, calculated for C<sub>42</sub>H<sub>53</sub>N<sub>3</sub>O<sub>6</sub>S [M+H]<sup>+</sup>: 728.3728; found 728.3732; [α]<sub>D</sub><sup>20</sup> = -11 (c = 0.2, CH<sub>2</sub>Cl<sub>2</sub>).

## 2.7 Linear hexapeptide 3Tg-G<sub>1</sub>- L-Cys(Trt)-(γ-Ach)<sub>4</sub>-L-Cys-CO<sub>2</sub>Me (**11a**)

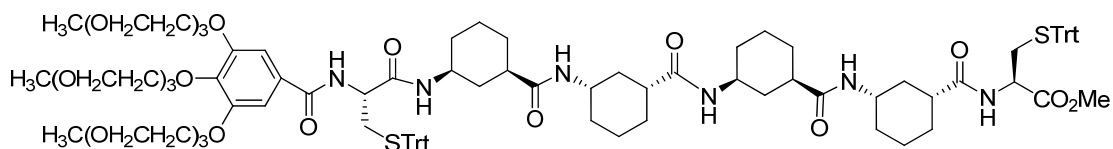

To a solution of **16** (76.4 mg, 0.105 mmol) in  $\text{CH}_2\text{Cl}_2$  (5 mL), and then HCl gas was introduced over a period of 2 hours. The mixture was stirred for 4 hours at room temperature. The solution was concentrated under reduced pressure, and then added  $\text{CH}_2\text{Cl}_2$  (2 mL) and removed the solvents, afforded **10** as yellow solid and used without further purification.

To a solution of **15a** (121.8 mg, 0.1 mmol) in THF/ $\text{H}_2\text{O}$ /MeOH (3:1:1, 10 mL)  $\text{LiOH}\cdot\text{H}_2\text{O}$  (42 mg, 1.0 mmol) was added at 0 °C. After stirred for 4 hours, the reaction mixture was diluted by water (10 mL). The aqueous solution was acidified by HCl (1 M) to pH 2 and extracted with  $\text{CH}_2\text{Cl}_2$  ( $3 \times 20$  mL). The combined organic layers were dried over anhydrous  $\text{Na}_2\text{SO}_4$ , and concentrated to give **9a** as yellow oil. To a solution of the yellow oil **9a** (0.1 mmol) and **10** (0.105 mmol) in  $\text{CH}_2\text{Cl}_2$  (10 mL), HOBT (14.8 mg, 0.11 mmol), EDCI (23 mg, 0.12 mmol) and DIPEA (28.4 mg, 0.22 mmol) were successively added at 0 °C, and then the mixture was stirred at room temperature for 48 hours. After that, the reaction mixture was diluted by  $\text{CH}_2\text{Cl}_2$  (20 mL), and the solution was washed with  $\text{NaHCO}_3$  (sat.), 1 M HCl and brine. The organic layers were dried over anhydrous  $\text{Na}_2\text{SO}_4$  and concentrated under reduced pressure. The residue was purified by column chromatography on silica gel ( $\text{CHCl}_3/\text{CH}_3\text{OH} = 40:1$ , v/v) to give **11a** (97 mg, 54%) as a white solid. Mp: decomposed at 265 °C;  $^1\text{H}$  NMR ( $\text{DMSO}-d_6$ , 600 MHz, ppm),  $\delta$ : 1.01-1.19 (m, 16H), 1.49-1.77 (m, 16H), 2.07-2.09 (m, 3H), 2.22-2.26 (m, 1H), 2.33-2.53 (m, 4H), 3.20, 3.21 ( $2 \times$  s, 9H), 3.38-3.40 (m, 6H), 3.47-3.66 (m, 27H), 3.74-3.75 (m, 4H), 4.05-4.14 (m, 7H), 4.48-4.49 (m, 1H), 7.18-7.33 (m, 32H), 7.59-7.62 (m, 3H), 7.81, 7.85 ( $2 \times$  d, 1H,  $J = 7.4, 7.7$  Hz), 8.20 (d, 1H,  $J = 7.7$  Hz), 8.48 (d, 1H,  $J = 5.8$  Hz);  $^{13}\text{C}$  NMR ( $\text{DMSO}-d_6$ , 75 MHz, ppm),  $\delta$ : 23.96, 28.30, 31.80, 32.84, 34.19, 35.43, 42.54, 43.05, 46.77, 47.38, 51.10, 51.92, 52.39, 57.96, 68.49, 68.92, 69.55, 69.79, 69.92, 71.22, 71.82, 77.27, 106.91, 126.73, 127.97, 128.99, 144.06, 144.27, 151.69, 165.15, 168.67, 170.64, 173.23, 174.28; FT-IR ( $\text{v}/\text{cm}^{-1}$ ): 3427, 3291, 3059, 2932, 2859, 1746, 1638, 1544, 1489, 1445, 1335, 1218, 1109, 743, 700; ESI-HRMS, calculated for  $\text{C}_{101}\text{H}_{133}\text{N}_6\text{O}_{20}\text{S}_2$   $[\text{M}+\text{H}]^+$ : 1813.9016; found 1813.9032;  $[\alpha]_D^{20} = -24$  ( $c = 0.2$ ,  $\text{CH}_2\text{Cl}_2$ ).

## 2.8 Linear hexapeptide 6Tg-G<sub>2</sub>- L-Cys(Trt)-(γ-Ach)<sub>4</sub>-L-Cys-CO<sub>2</sub>Me (11b)

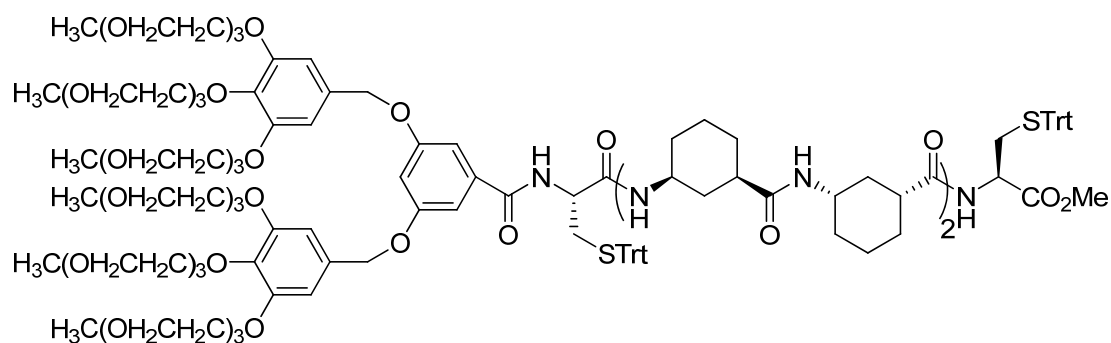

To a solution of **16** (96 mg, 0.132 mmol) in  $\text{CH}_2\text{Cl}_2$  (10 mL) HCl gas was introduced over a period of 2 hours. The mixture was stirred for 4 hours at room temperature. The solution was concentrated under reduced pressure, and then added  $\text{CH}_2\text{Cl}_2$  (2 mL) and removed the solvents, afforded **10** as yellow solid and used without further purification.

To a solution of **15b** (253 mg, 0.132 mmol) in THF/ $\text{H}_2\text{O}$ /MeOH (3:1:1, 15 mL)  $\text{LiOH}\cdot\text{H}_2\text{O}$  (55.4

mg, 1.2 mmol) was added at 0 °C. After stirred for 4 hours, the reaction mixture was diluted by water. The aqueous solution was acidified by HCl (1 M) to pH 2 and extracted with CH<sub>2</sub>Cl<sub>2</sub> (3 × 20 mL). The combined organic layers were dried over anhydrous Na<sub>2</sub>SO<sub>4</sub>, and concentrated to give **9b** as yellow oil. To a solution of the yellow oil (0.132 mmol) and **10** (0.132 mmol) in CH<sub>2</sub>Cl<sub>2</sub> (15 mL), HATU (60.2 mg, 0.158 mmol), HOAT (23.2 mg, 0.145 mmol) and DIPEA (68.1 mg, 0.53 mmol) were successively added at 0 °C, and then the mixture was stirred for 48 hours at room temperature. The solution was diluted by CHCl<sub>3</sub> (70 mL) and successively washed with NaHCO<sub>3</sub> (sat.) (2 × 25 mL), 1 M HCl (2 × 25 mL) and brine (1 × 25 mL). The organic layers were dried over anhydrous Na<sub>2</sub>SO<sub>4</sub>. After removal of the solvent, the residue was purified by column chromatography on silica gel (CH<sub>2</sub>Cl<sub>2</sub>/MeOH = 60:1, v/v) to give **11b** (180 mg, 54%) as a white solid. Mp: decomposed at 202 °C; <sup>1</sup>H NMR (DMSO-d<sub>6</sub>, 600 MHz, ppm), δ: 1.04-1.27 (m, 16H), 1.58-1.80 (m, 16H), 2.12 (brs, 3H), 2.24-2.29 (m, 1H), 2.35-2.47 (m, 3H), 2.54-2.55 (m, 1H), 3.22, 3.24 (2 × s, 18H), 3.40-3.44 (m, 13H), 3.51-3.53 (m, 30H), 3.58-3.60 (m, 12H), 3.67-3.74 (m, 12H), 4.02-4.03 (m, 4H), 4.10-4.11 (m, 9H), 4.45-4.49 (m, 1H), 5.02 (s, 4H), 6.79 (s, 4H), 6.86 (s, 1H), 7.17 (s, 2H), 7.23-7.36 (m, 30H), 7.62-7.66 (m, 3H), 7.85 (d, 1H, *J* = 8.5 Hz), 8.24 (d, 1H, *J* = 8.0 Hz), 8.48 (d, 1H, *J* = 8.1 Hz); <sup>13</sup>C NMR (DMSO-d<sub>6</sub>, 150 MHz, ppm), δ: 24.00, 24.52, 28.47, 28.83, 32.32, 33.36, 35.96, 43.06, 43.59, 47.18, 47.30, 47.88, 51.62, 52.47, 58.49, 66.35, 66.74, 68.91, 69.49, 70.09, 70.22, 70.33, 70.45, 71.75, 72.28, 107.13, 107.53, 127.19, 127.29, 128.49, 128.55, 129.52, 129.55, 132.47, 137.77, 144.59, 144.78, 152.66, 159.85, 171.19, 173.79, 174.85; FT-IR (ν/cm<sup>-1</sup>): 3287, 3055, 2931, 2862, 1745, 1637, 1592, 1545, 1505, 1442, 1332, 1111, 851, 745, 702; ESI-HRMS, calculated for C<sub>136</sub>H<sub>186</sub>KN<sub>6</sub>O<sub>34</sub>S<sub>2</sub> [M+K]<sup>+</sup>: 2550.2; found 2550.3; [α]<sub>D</sub><sup>20</sup> = -17 (c = 0.2, CH<sub>2</sub>Cl<sub>2</sub>).

## 2.9 Cyclic peptide 3Tg-G<sub>1</sub>-Cyclo-(L-Cys-(γ-Ach)<sub>4</sub>-L-Cys) (1a)

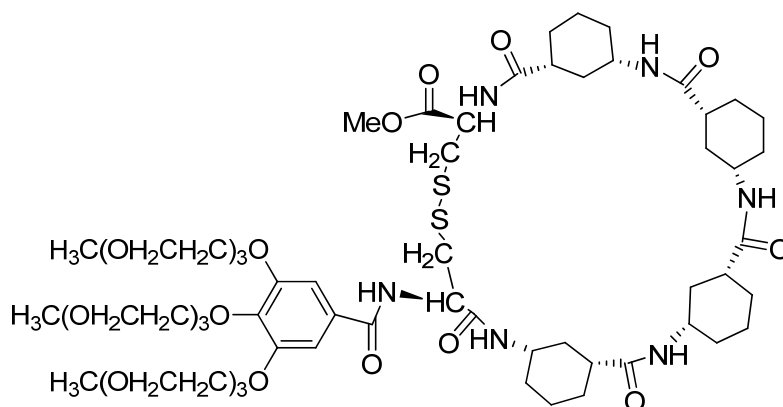

To a solution of I<sub>2</sub> (101 mg, 0.4 mmol) in CH<sub>3</sub>OH/CH<sub>2</sub>Cl<sub>2</sub> (10:90, 120 mL), **11a** (30 mg, 0.017 mmol) in CH<sub>3</sub>OH/CH<sub>2</sub>Cl<sub>2</sub> (10:90, 30 mL) was added by dropwise at -10 °C, and the resulting mixture was stirred at -10 °C for 20 minutes. After 2 M Na<sub>2</sub>S<sub>2</sub>O<sub>3</sub> (100 mL) was added, the reaction mixture was concentrated. The solution was extracted with CHCl<sub>3</sub> (3 × 30 mL). The combined organic layers were dried over MgSO<sub>4</sub> and concentrated in vacuo. The residue was purified by column chromatography on silica gel (CHCl<sub>3</sub>/CH<sub>3</sub>OH = 30:1, v/v) to give cyclic peptide **1a** (16 mg, 73%) as a white solid. Mp: decomposed at 278 °C; FT-IR(ν/cm<sup>-1</sup>): 3443, 3296, 2932, 2859, 1747, 1634, 1582, 1546, 1496, 1452, 1397, 1334, 1218, 1112; ESI-HRMS, calculated for C<sub>63</sub>H<sub>102</sub>N<sub>6</sub>Na<sub>2</sub>O<sub>20</sub>S<sub>2</sub> [M+2Na]<sup>2+</sup>: 686.3913; found 686.3187; MS (MALDI-TOF), calculated for C<sub>63</sub>H<sub>102</sub>N<sub>6</sub>NaO<sub>20</sub>S<sub>2</sub> [M+Na]<sup>+</sup>: 1349.6; found 1349.8; [α]<sub>D</sub><sup>20</sup> = -12 (c = 0.2, CHCl<sub>3</sub>: MeOH, 3:1).

## 2.10 Cyclic peptide 6Tg-G<sub>2</sub>-Cyclo-(L-Cys-(γ-Ach)<sub>4</sub>-L-Cys) (1b)

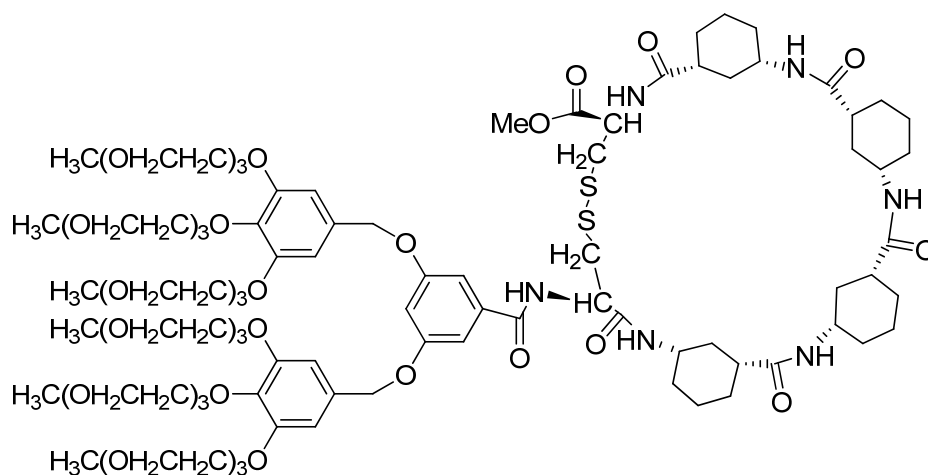

To a solution of I<sub>2</sub> (594 mg, 2.34 mmol) in CH<sub>3</sub>OH/CH<sub>2</sub>Cl<sub>2</sub> (10:90, 400 mL), **11b** (251.3 mg, 0.1 mmol) in CH<sub>3</sub>OH/CH<sub>2</sub>Cl<sub>2</sub> (10:90, 100 mL) was added by dropwise at -10 °C, and the resulting mixture was stirred at -10 °C for 4 hours. After 2 M Na<sub>2</sub>S<sub>2</sub>O<sub>3</sub> (100 mL) was added, the reaction mixture was concentrated to remove organic solvents. Then, the solution was extracted with CHCl<sub>3</sub> (3 × 50 mL). The combined organic layers were dried over anhydrous Na<sub>2</sub>SO<sub>4</sub> and concentrated in vacuo. The residue was purified by column chromatography on silica gel (CHCl<sub>3</sub>/CH<sub>3</sub>OH = 40:1, v/v) to give cyclic peptide **1b** (99 mg, 49%) as a white solid. Mp: decomposed at 271 °C; <sup>1</sup>H NMR (DMSO-d<sub>6</sub>, 600 MHz, ppm), δ: 1.23-1.35 (m, 16H), 1.64-1.91 (m, 16H), 2.07-2.37 (m, 4H), 2.99-3.16 (m, 4H), 3.20, 3.22 (2 × s, 18H), 3.38-3.42 (m, 12H), 3.48-3.58 (m, 27H), 3.65-3.72 (m, 15H), 4.00 (brs, 4H), 4.09 (brs, 8H), 4.56-4.66 (m, 2H), 5.00 (s, 4H), 6.77 (s, 4H), 6.83 (s, 1H), 7.16 (s, 2H), 7.42-7.43 (m, 2H, NH), 7.65 (brs, 1H, NH), 8.10 (d, 1H, NH, *J* = 6.5 Hz), 8.32 (d, 1H, NH, *J* = 7.7 Hz), 8.56 (d, 1H, NH, *J* = 8.0 Hz); <sup>13</sup>C NMR (DMSO-d<sub>6</sub>, 150 MHz, ppm), δ: 23.26, 24.08, 24.41, 28.16, 28.29, 30.88, 31.39, 31.74, 32.05, 35.59, 35.72, 36.13, 43.15, 44.23, 44.80, 47.47, 47.72, 48.34, 51.50, 52.53, 53.05, 58.49, 68.91, 69.49, 70.09, 70.21, 70.32, 70.45, 71.75, 72.28, 105.40, 107.06, 107.54, 132.47, 136.33, 137.76, 152.65, 159.83, 166.00, 168.96, 171.33, 173.76, 173.94, 174.37, 174.98; FT-IR(v/cm<sup>-1</sup>): 3436, 3307, 3056, 2931, 2863, 1746, 1635, 1593, 1535, 1505, 1439, 1347, 1332, 1296, 1249, 1112, 941, 846; ESI-HRMS, calculated for C<sub>98</sub>H<sub>156</sub>KN<sub>6</sub>O<sub>34</sub>S<sub>2</sub> [M+K]<sup>+</sup>: 2064.0; found 2063.9; MS (MALDI-TOF), calculated for C<sub>98</sub>H<sub>156</sub>NaN<sub>6</sub>O<sub>34</sub>S<sub>2</sub> [M+Na]<sup>+</sup>: 2048.0; found 2048.5; [α]<sub>D</sub><sup>20</sup> = -16 (c = 0.2, CH<sub>2</sub>Cl<sub>2</sub>).

## 3. Preparation of Peptide Single Crystals for SEM:

25 mg of **1a** was dissolved in CHCl<sub>3</sub> (3 mL) and equilibrated by vaporphase diffusion against CH<sub>3</sub>OH (5 mL). This resulted in spontaneous crystallization after 7 days.

## 4. Preparation of Cyclic Peptide Nanotubes and Nanofibers for TEM

### Analysis:

**Method A:** The 3 mg of **1a** or **1b** was dissolved in CHCl<sub>3</sub> (0.5 mL) and equilibrated via vapor-phase

diffusion against 5 mL of hexane, resulting in a gel phase after 2~4 days. The gels were dispersed in *n*-hexane, water, and water-ethanol (1:1, v/v), respectively, by sonication.

**Method B:** **1b** was dissolved in acetonitrile, water and their mixture (0.1 mg/mL), respectively, and then heated in an oil bath at 100 °C to yield a transparent solution. The resulting solution of **1b** was cooled to room temperature for overnight.

## 5. FT-IR, SEM and AFM Results:

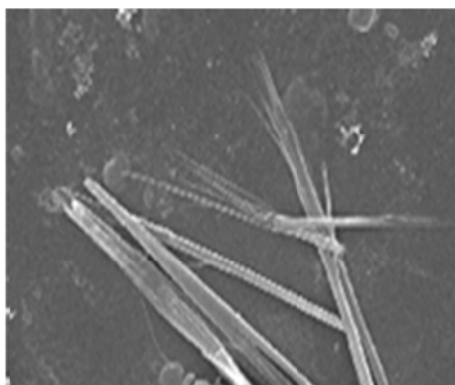

**Figure S2** SEM image of the assemblies of **1a**, indicates that each assembly is organized bundle of needle-shaped microcrystals with about 500 nm in diameter and over several microns in length.

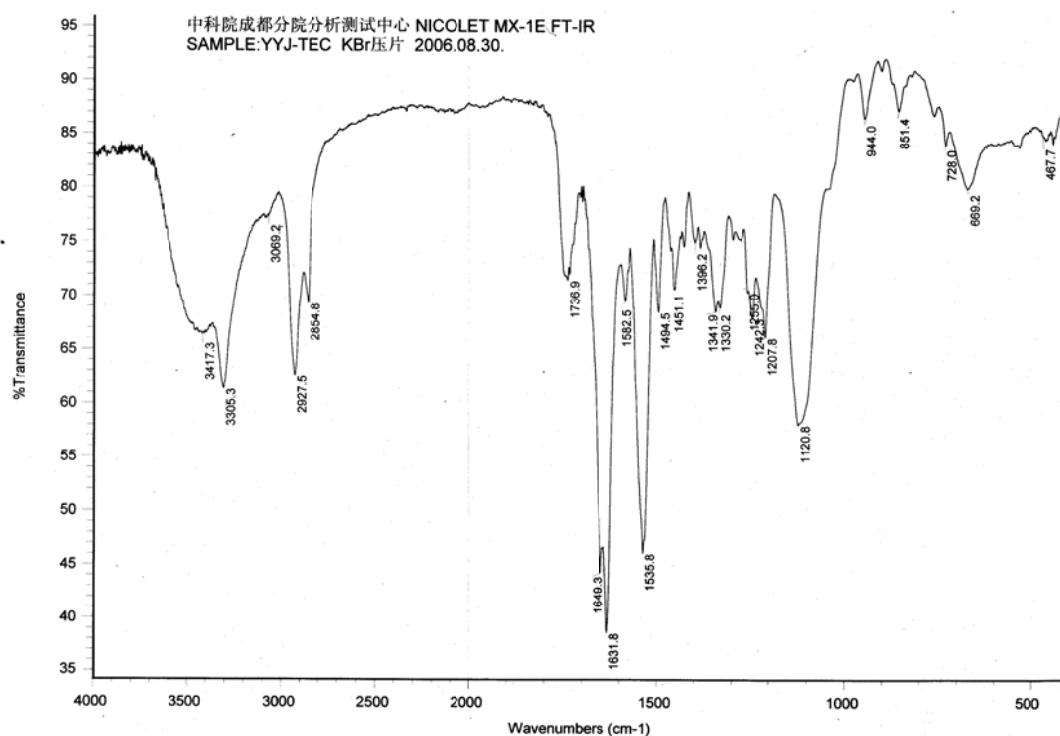

**Figure S3.** FT-IR Spectrum of 3Tg-G<sub>1</sub>-Cyclo-(L-Cys-( $\gamma$ -Ach)<sub>4</sub>-L-Cys) (**1a**) in the solid state on KBr pellets.

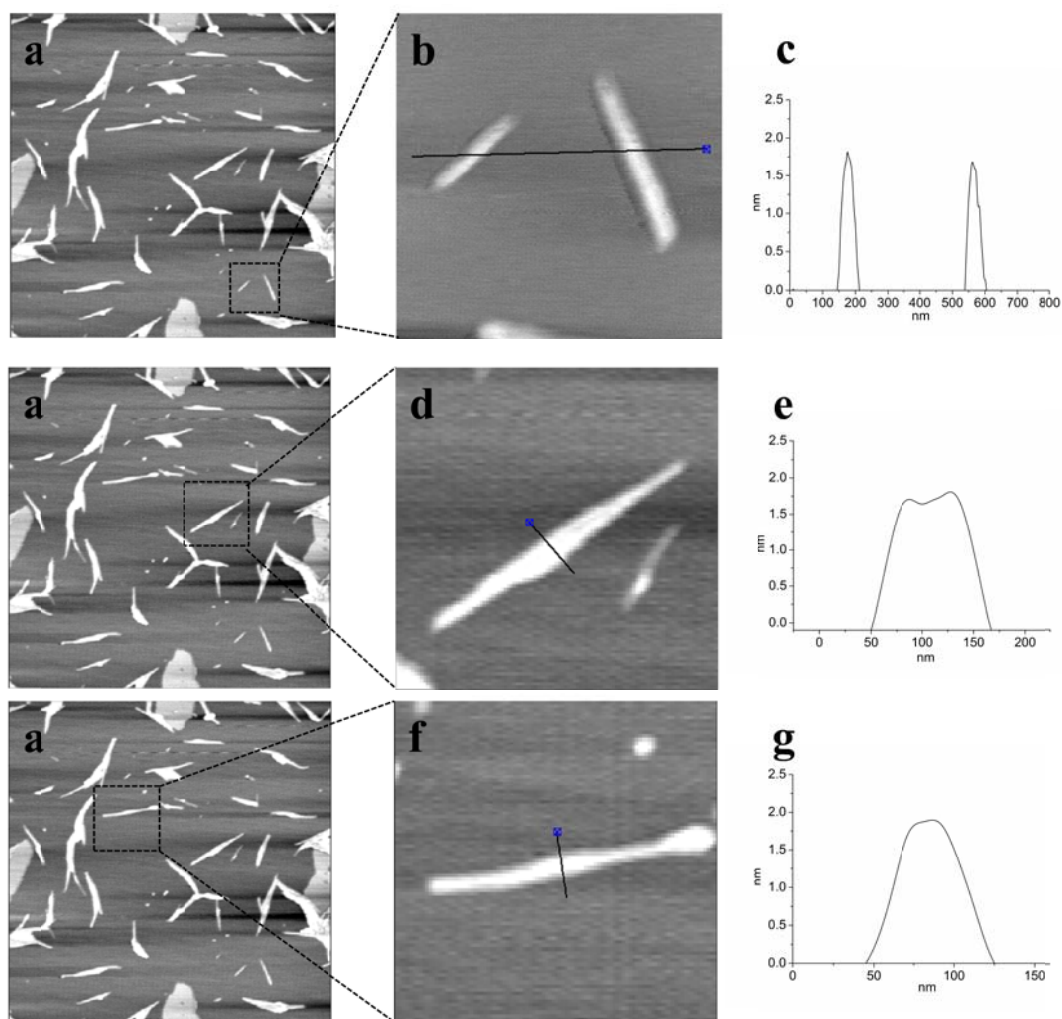

**Figure S4** (a) AFM image of the gel of **1a** dispersed in water-ethanol (1:1, v/v); (b,d,f) an enlarged area of the AFM image is shown; (c,e,g) Height profile measured along the line shown respectively in (b,d,f).

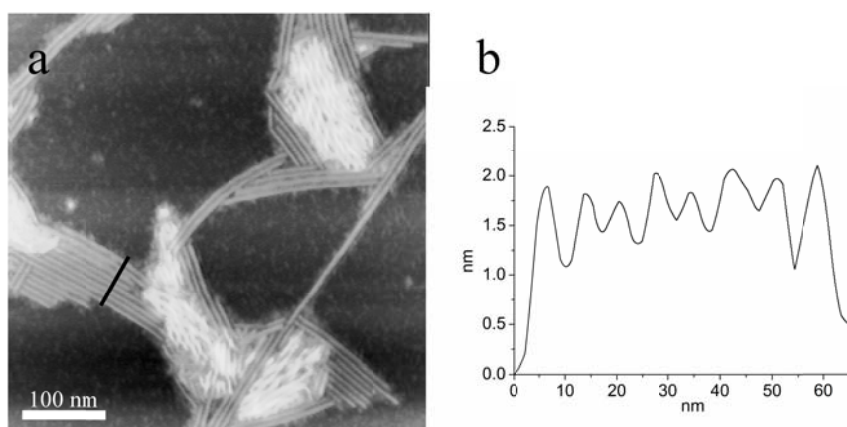

**Figure S5** (a) AFM image of the gel of **1b** dispersed in water; (b) Height profile measured along the line shown in (a).

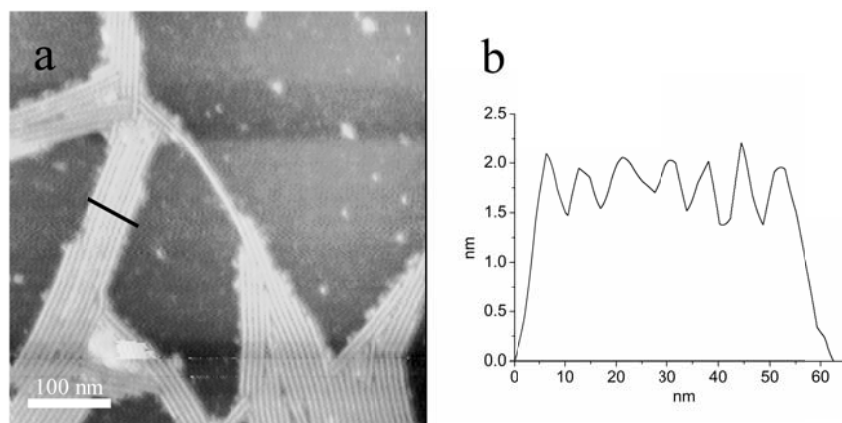

**Figure S6** (a) AFM image of the gel of **1b** dispersed in water-ethanol (1:1, v/v); (b) Height profile measured along the line shown in (a).

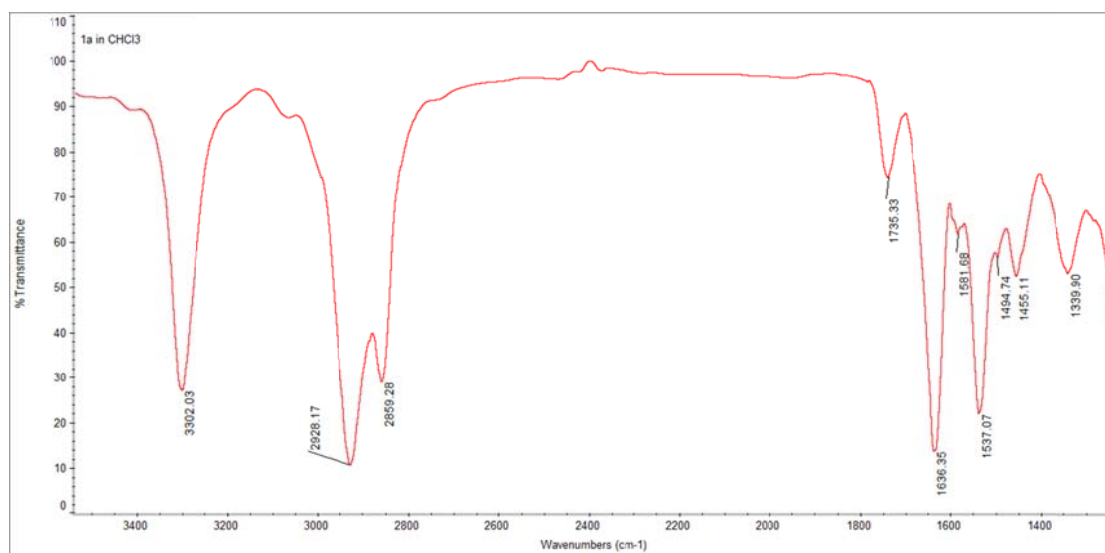

**Figure S7.** FT-IR spectrum of **1a** in  $\text{CHCl}_3$ .

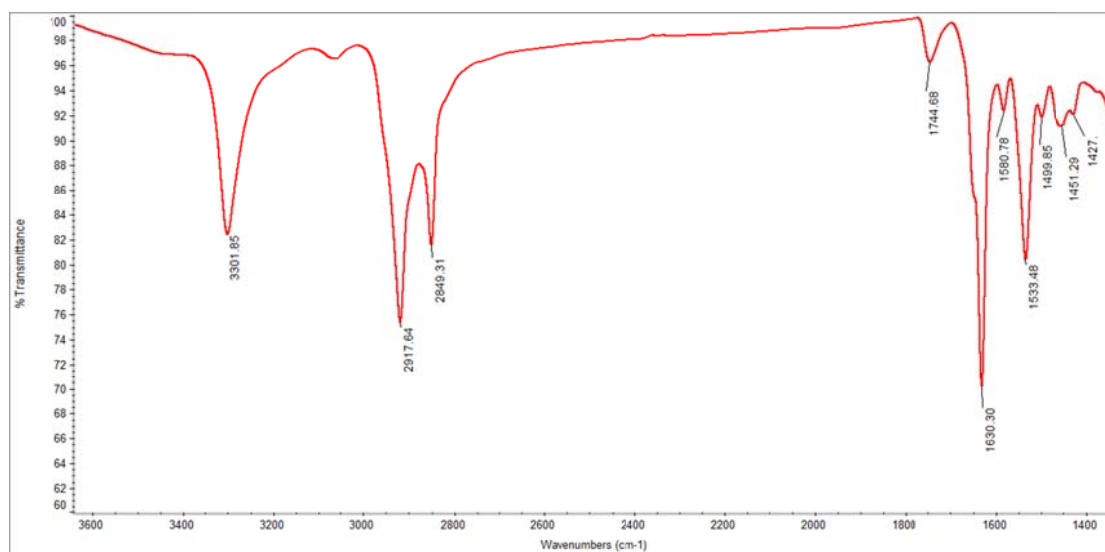

**Figure S8.** FT-IR spectrum of **1a** in the gel state on KBr pellets .

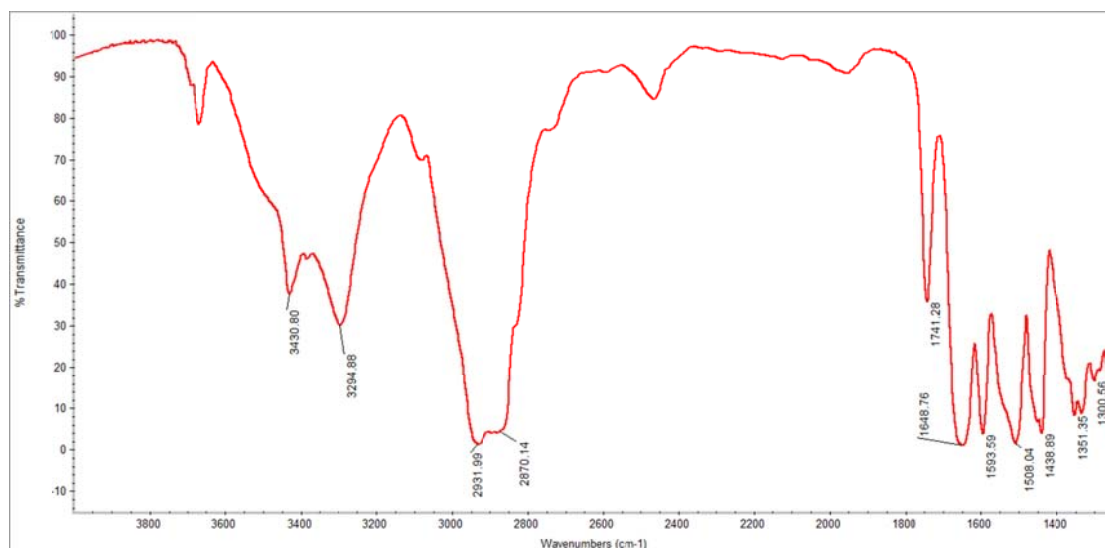

**Figure S9.** FT-IR spectrum of 6Tg-G<sub>2</sub>-Cyclo-(L-Cys-(γ-Ach)<sub>4</sub>-L-Cys) (**1b**) in CHCl<sub>3</sub>.

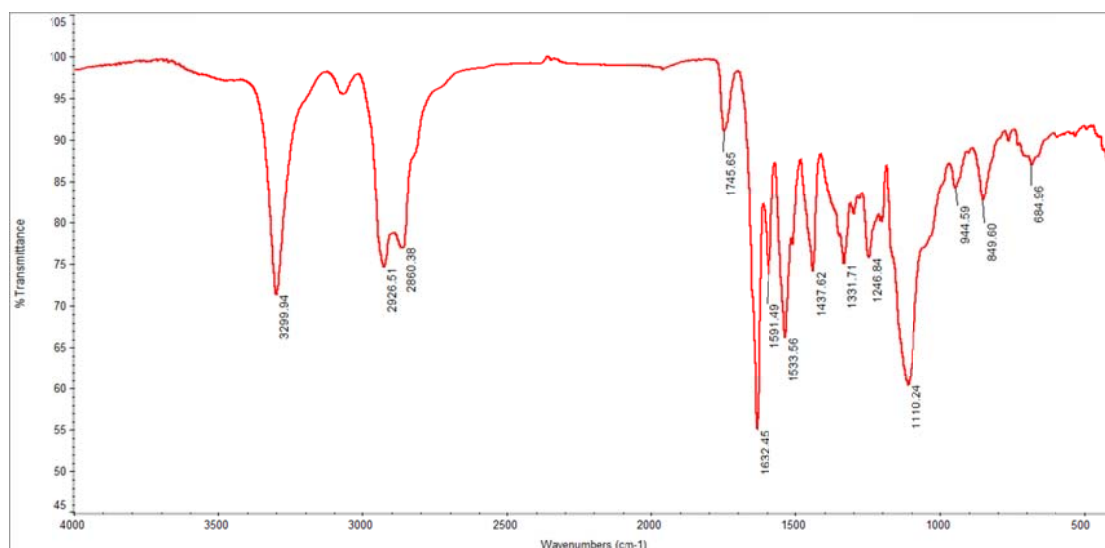

**Figure S10.** FT-IR spectrum of **1b** in the gel state on KBr pellets .

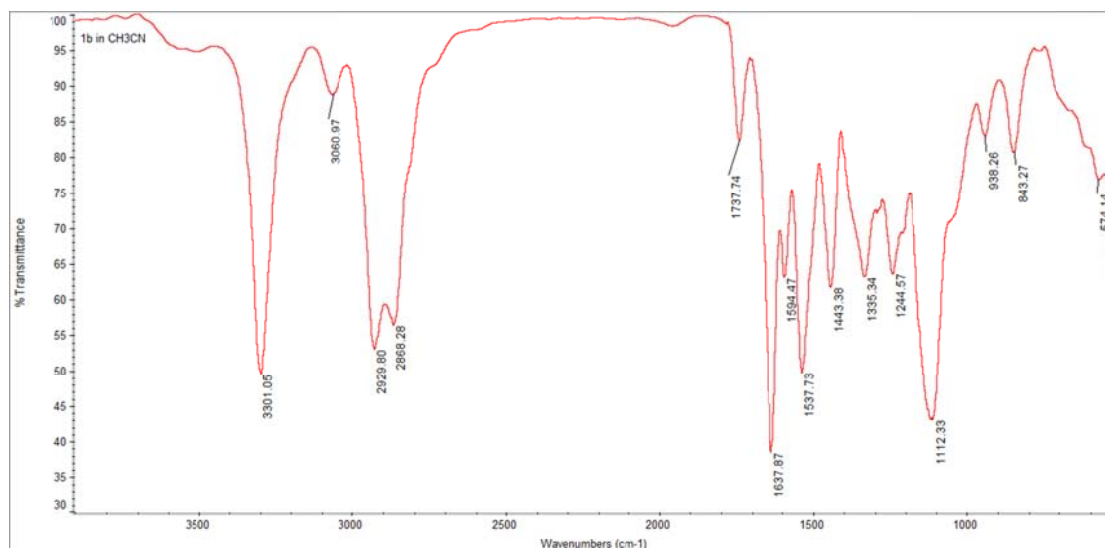

**Figure S11.** FT-IR spectrum of **1b** in  $\text{CH}_3\text{CN}$ .

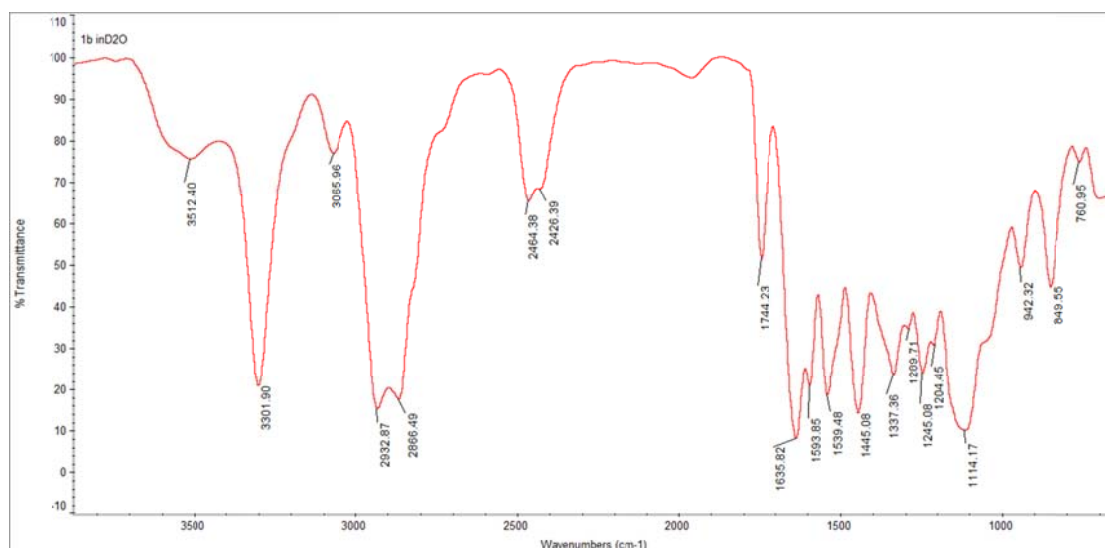

**Figure S12.** FT-IR spectrum of **1b** in  $\text{D}_2\text{O}$ .

## 6. NMR Researches:

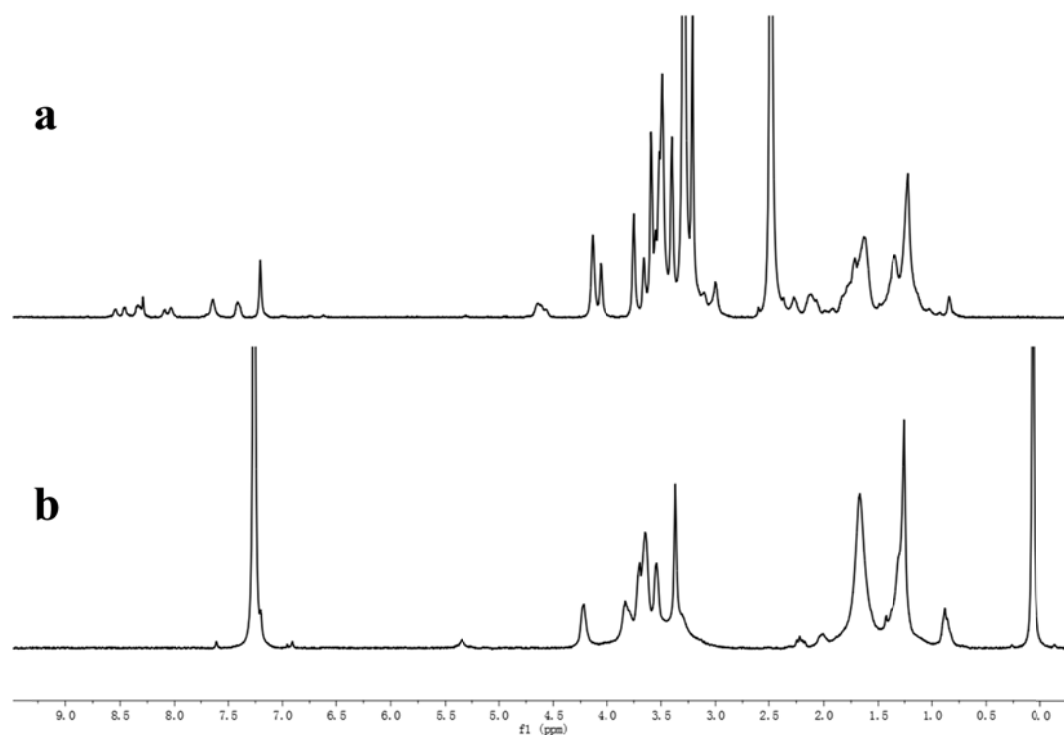

**Figure S13.**  $^1\text{H}$  NMR spectrum of **1a** (a) in  $\text{DMSO-d}_6$ , (b) in  $\text{CDCl}_3$ ; showing peaks broaden significantly with poor-resolved signals in  $\text{CDCl}_3$

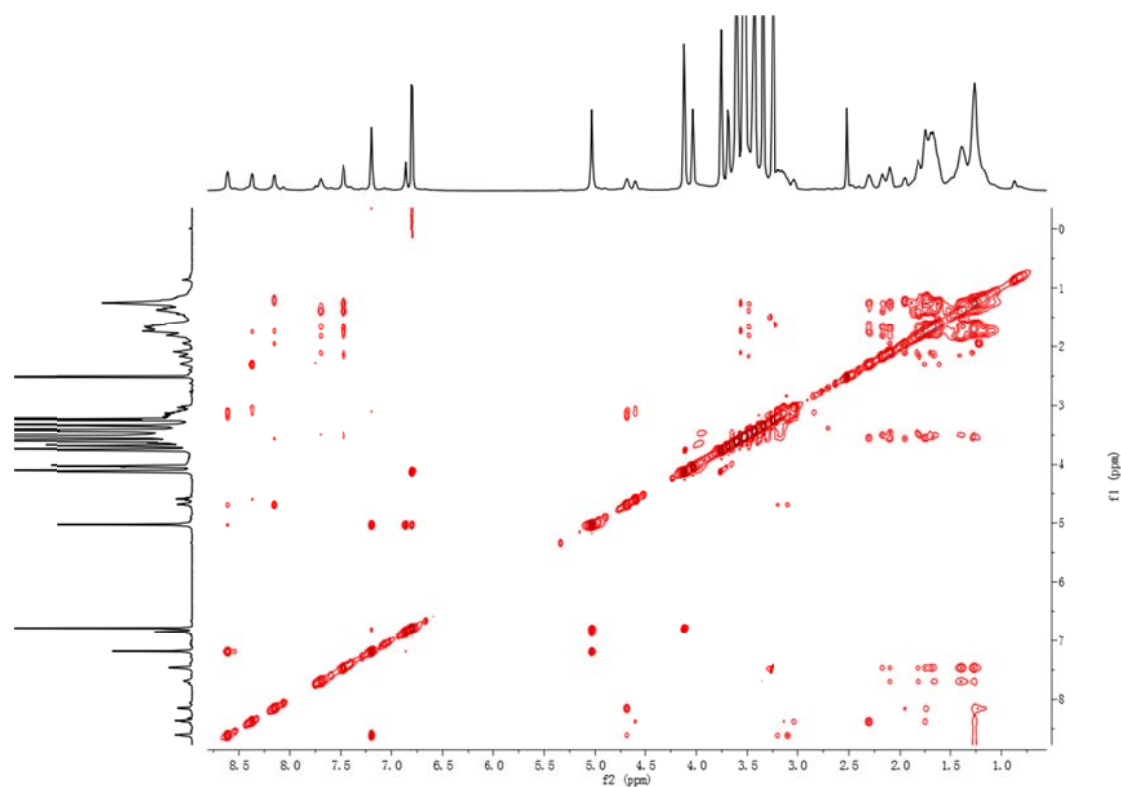

**Figure 14.** 2D NOESY spectrum of **1b** in  $\text{DMSO-d}_6$  (20 mM).

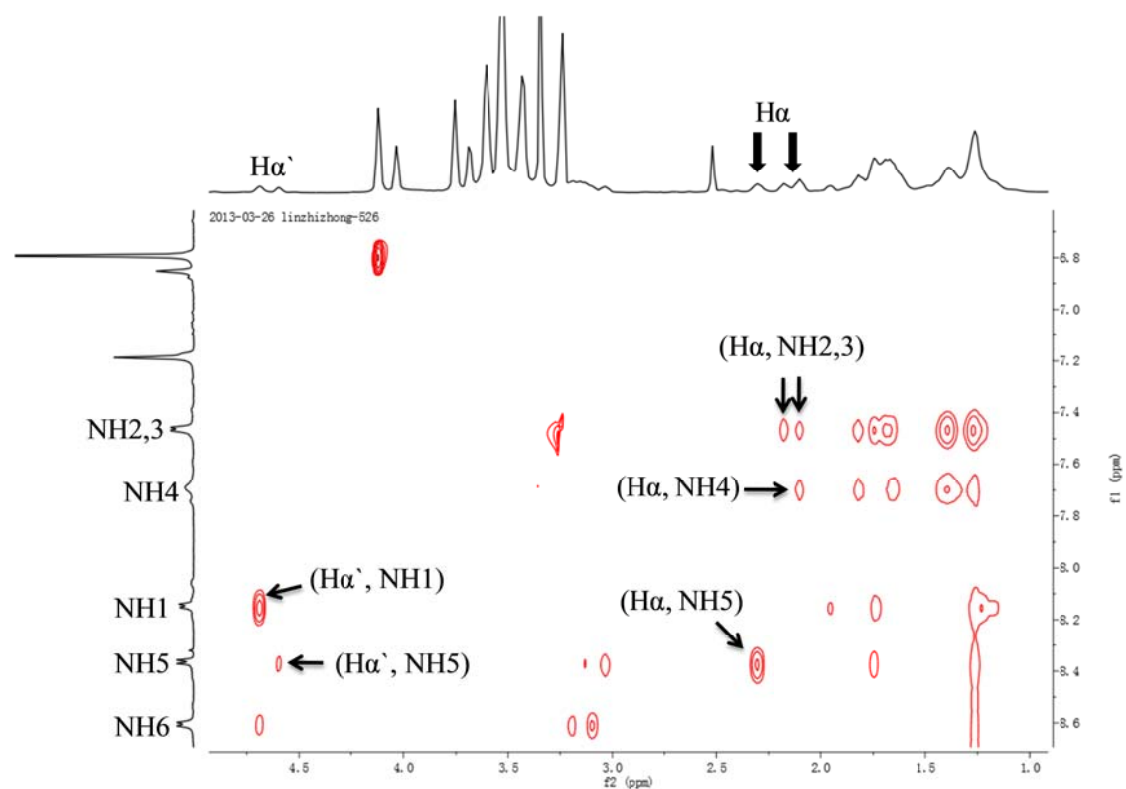

**Figure S15.** Expand 2D NOESY spectrum of **1b** in DMSO- $d_6$ .  $H\alpha$  is the proton of  $\gamma$ -Achs, while  $H\alpha'$  is the proton of cysteine residues.

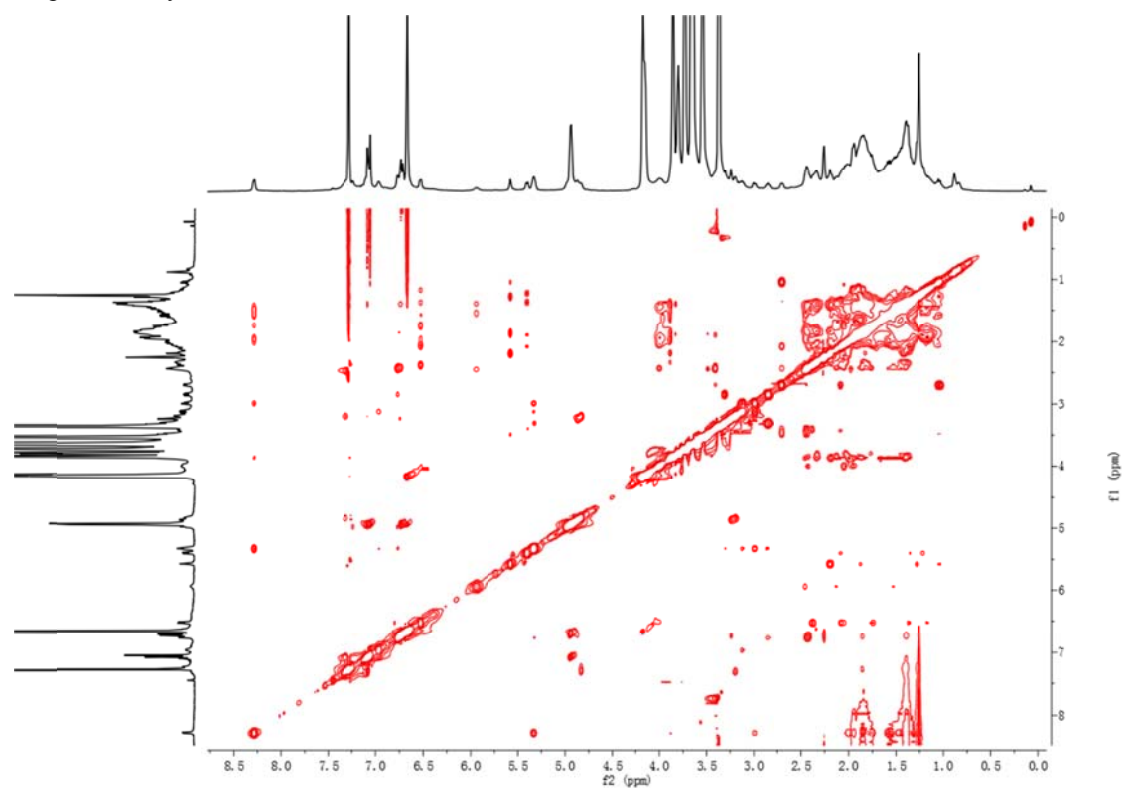

**Figure S16.** 2D NOESY spectrum of **1b** in CDCl<sub>3</sub> (20 mM).

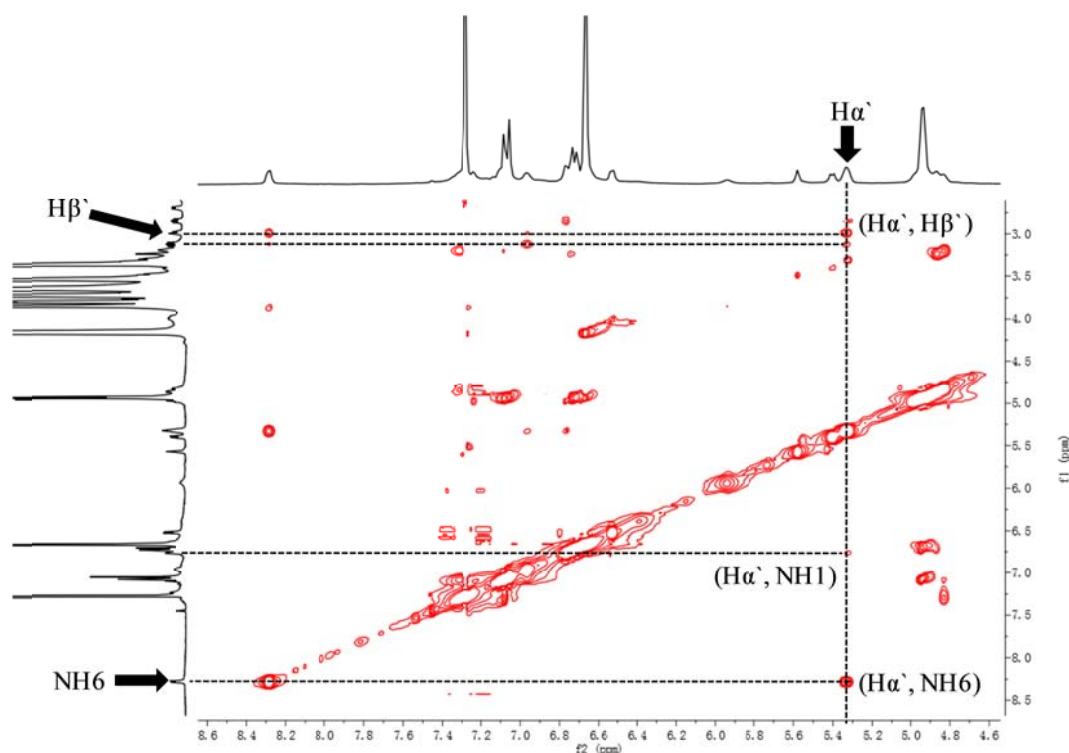

**Figure S17.** Expand 2D NOESY spectrum of **1b** in  $\text{CDCl}_3$ .  $\text{H}\alpha'$  and  $\text{H}\beta'$  are the proton of cysteine residues.

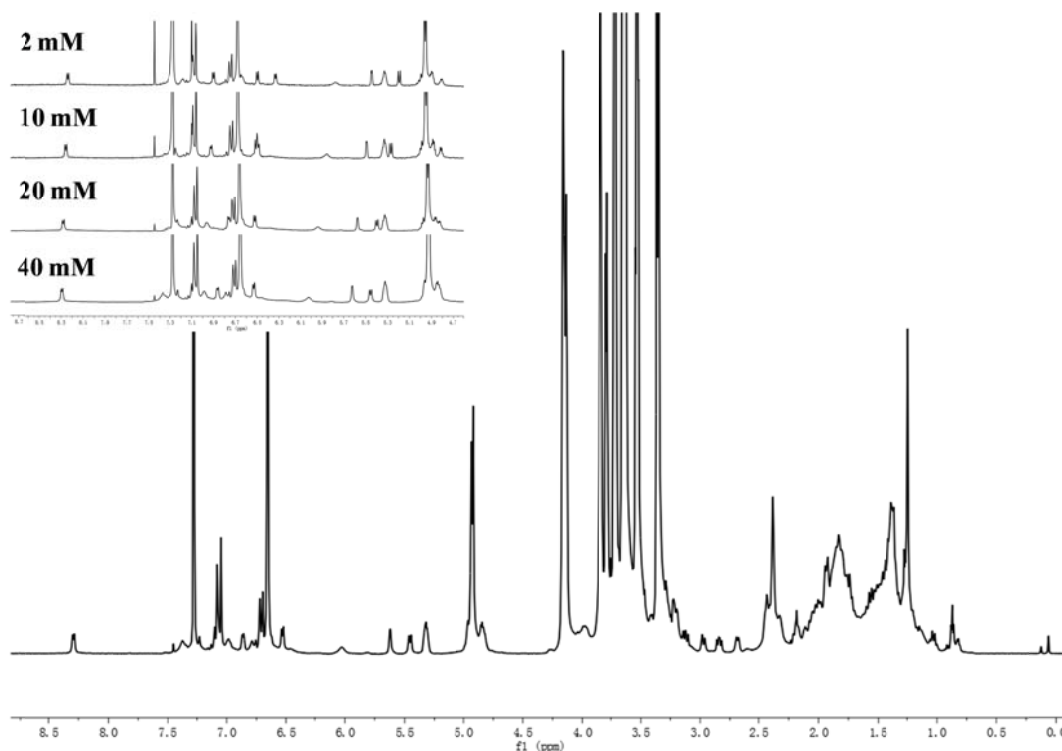

**Figure S18.**  $^1\text{H}$  NMR spectrum of **1b** in  $\text{CDCl}_3$  (40 mM). Inset is the selected region of (4.7-8.7 ppm) of the spectrum of **1b** in  $\text{CDCl}_3$  at 2, 10, 20, and 40 mM concentration, showing the downfield shifted of the N-H signals.

## 7. MALDI-TOF and HPLC Results:

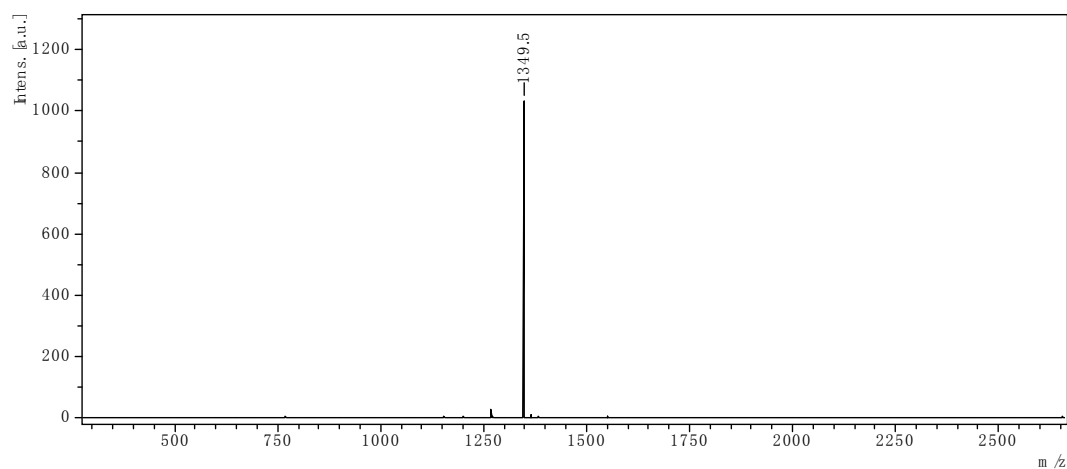

**Figure S19.** MALDI-TOF mass spectra of a gel sample prepared from **1a**.

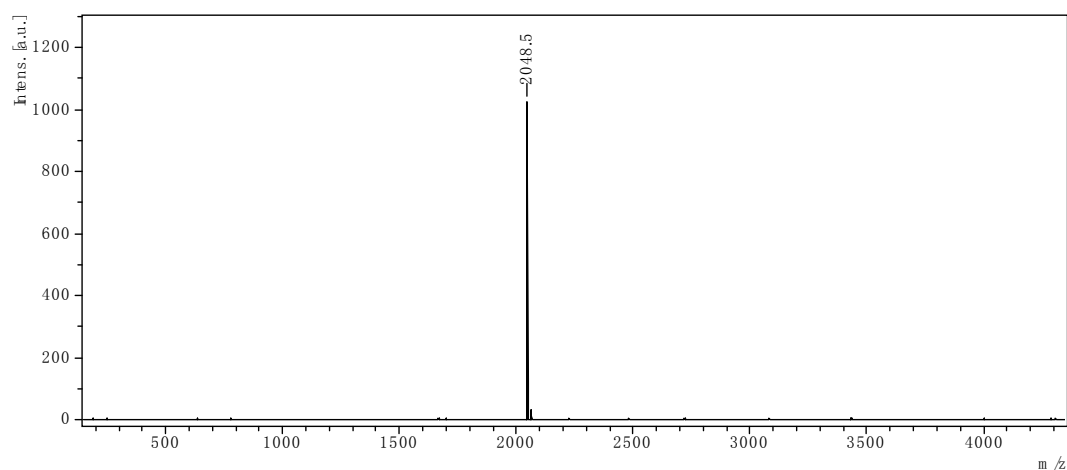

**Figure S20.** MALDI-TOF mass spectra of a gel sample prepared from **1b**.

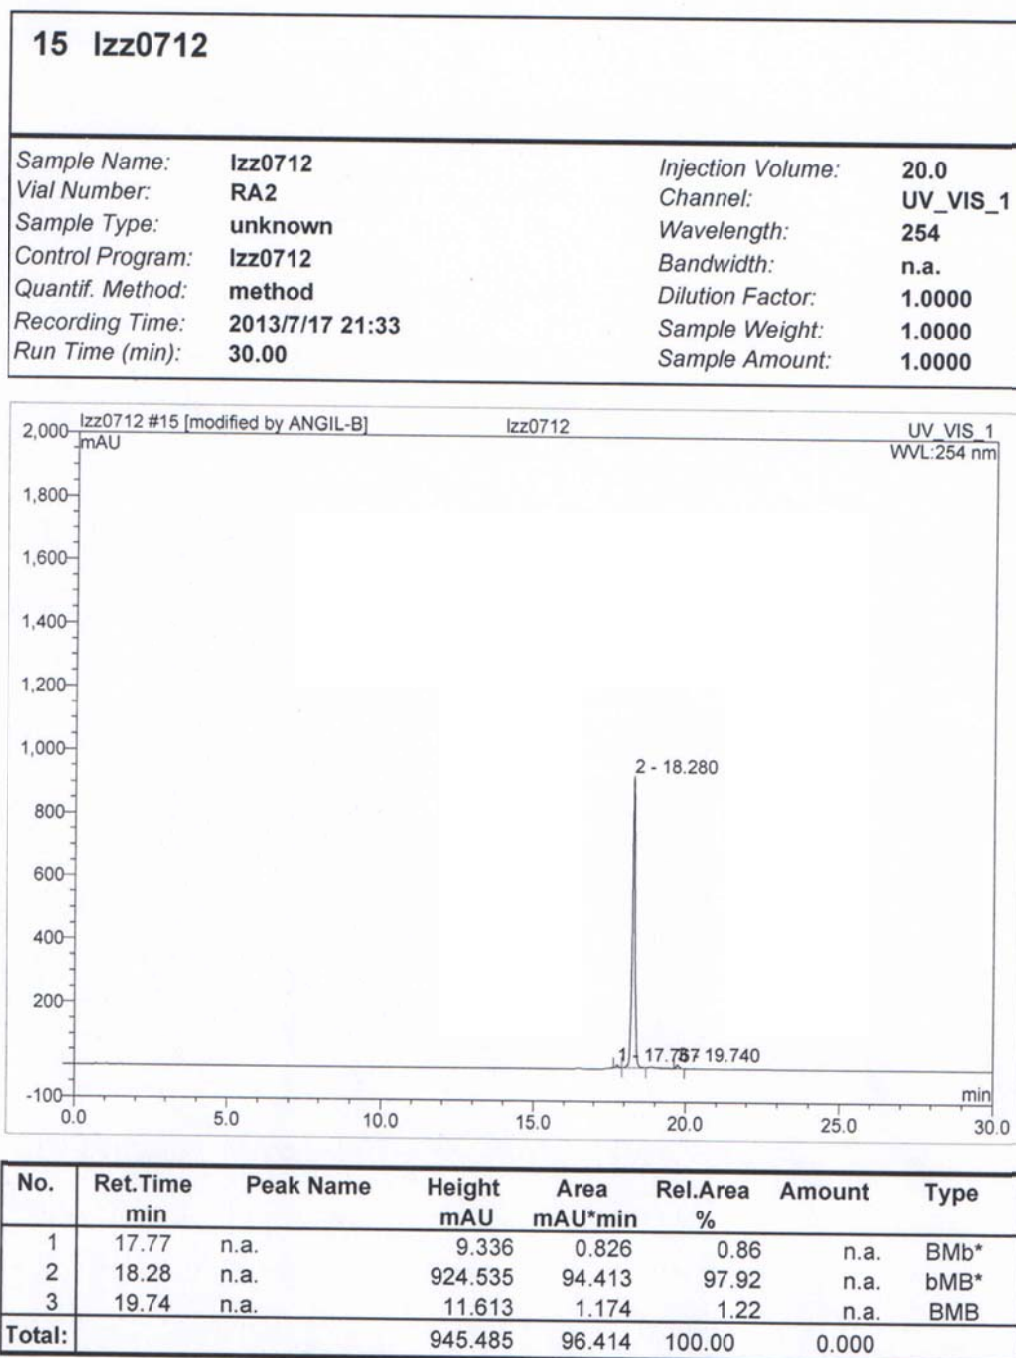

**Figure S21.** HPLC analysis of a sample of **1b** which was purified by column chromatography (silica gel).

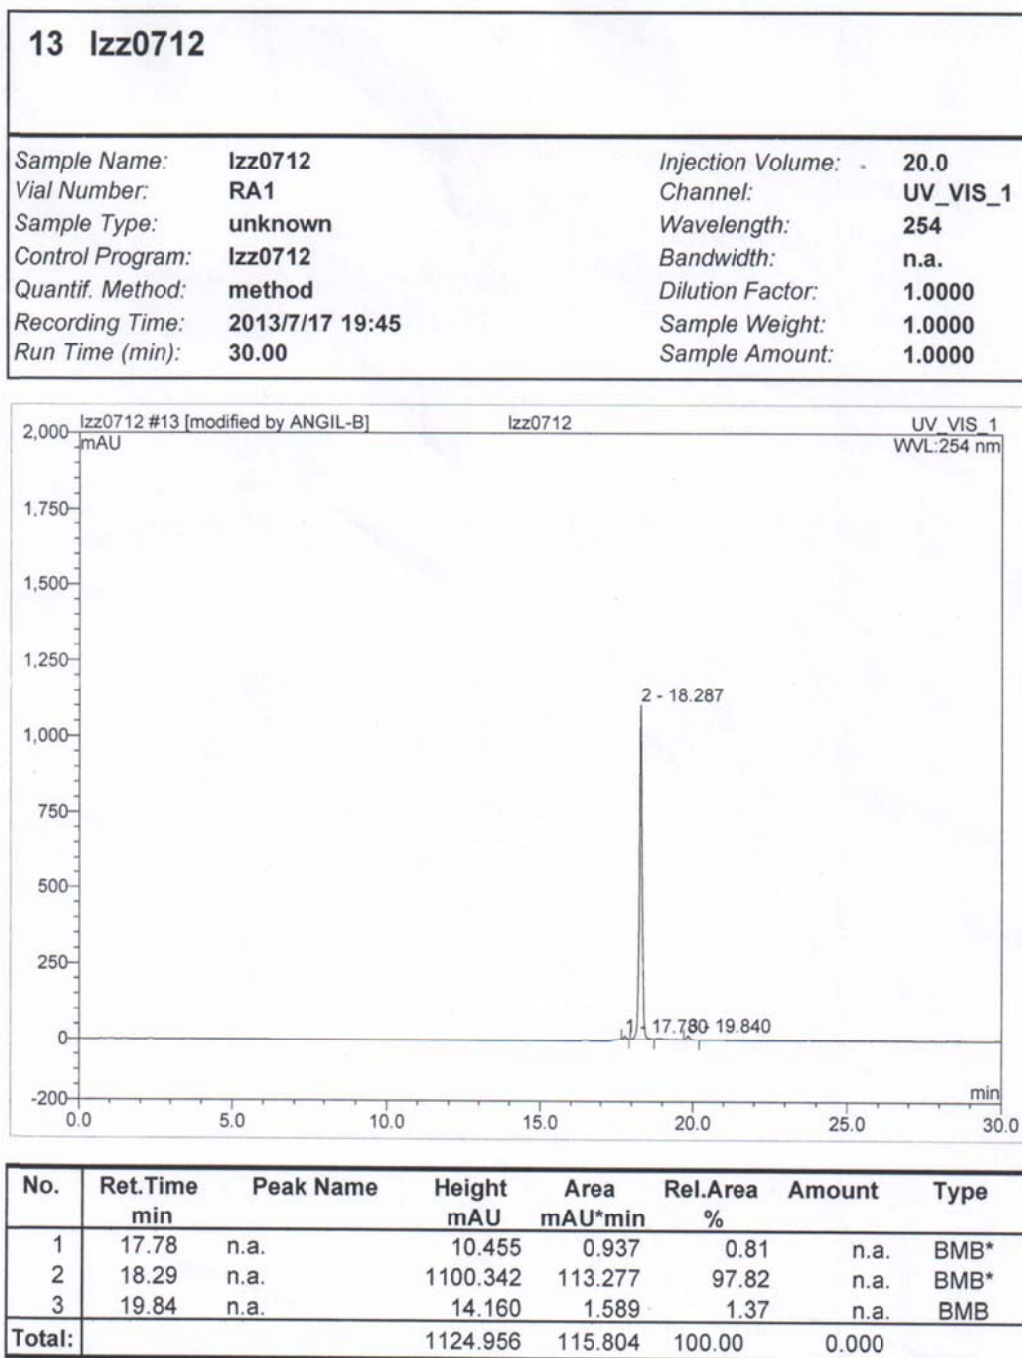

**Figure S22.** HPLC analysis of a sample of **1b** from formed gels.

## 8. Spectral Data:

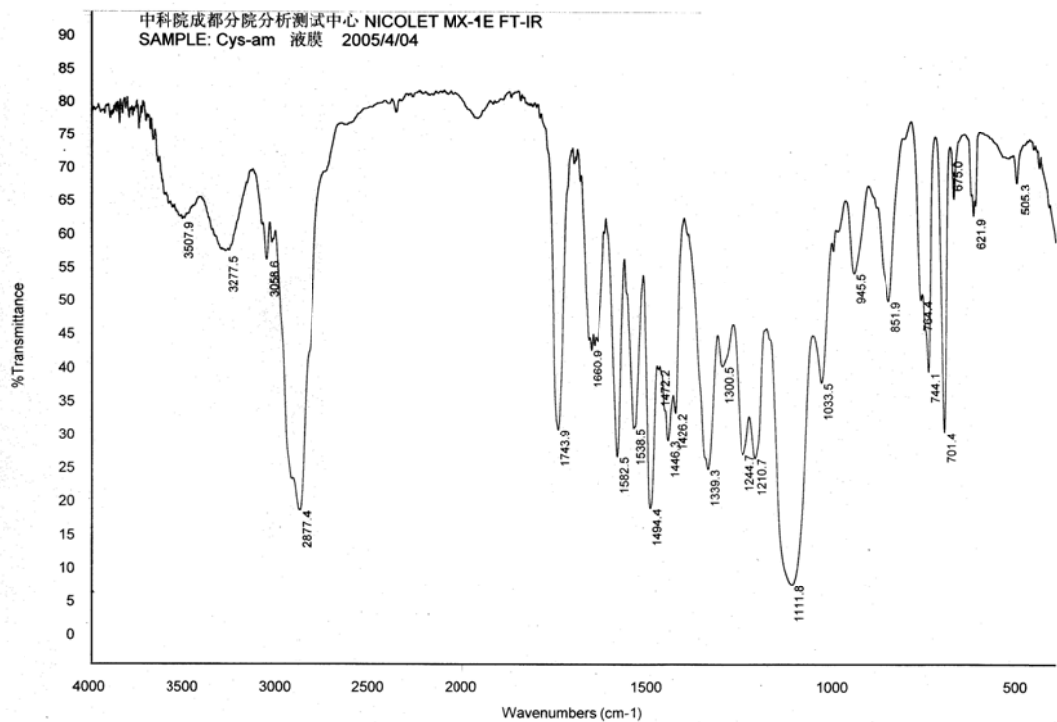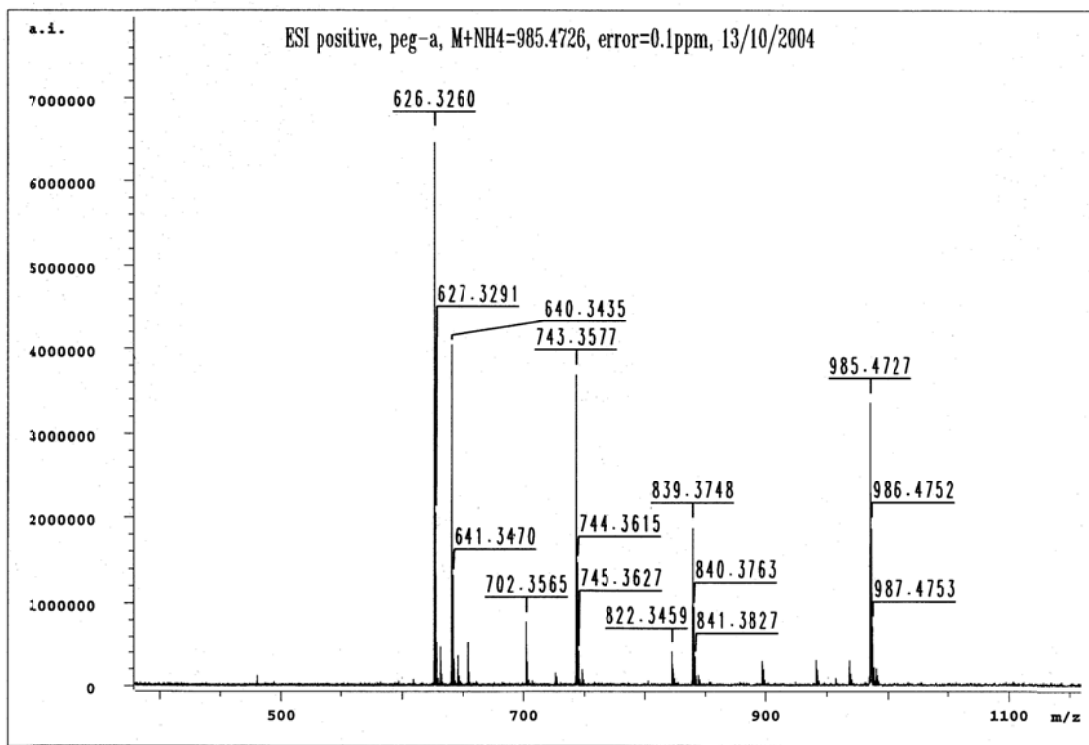

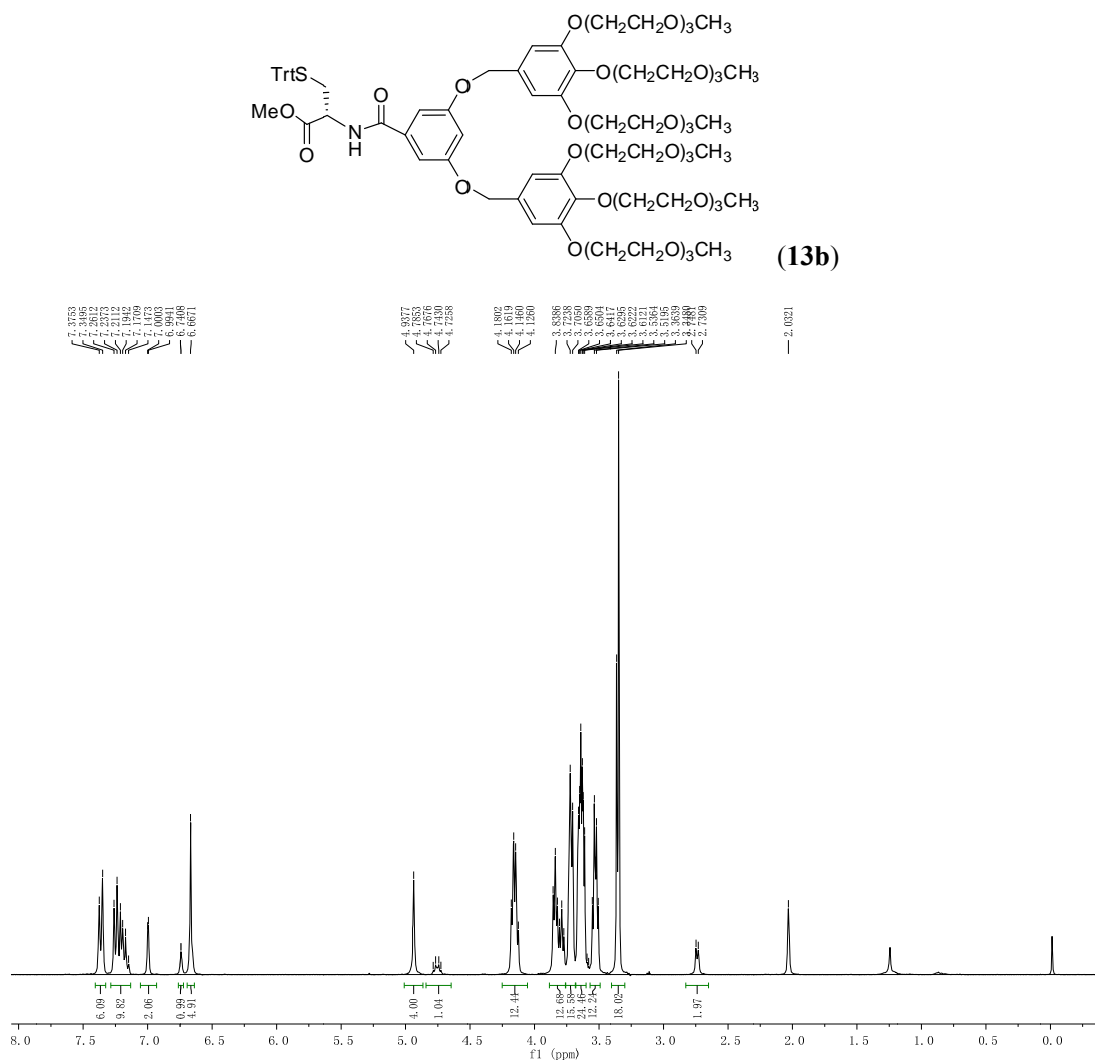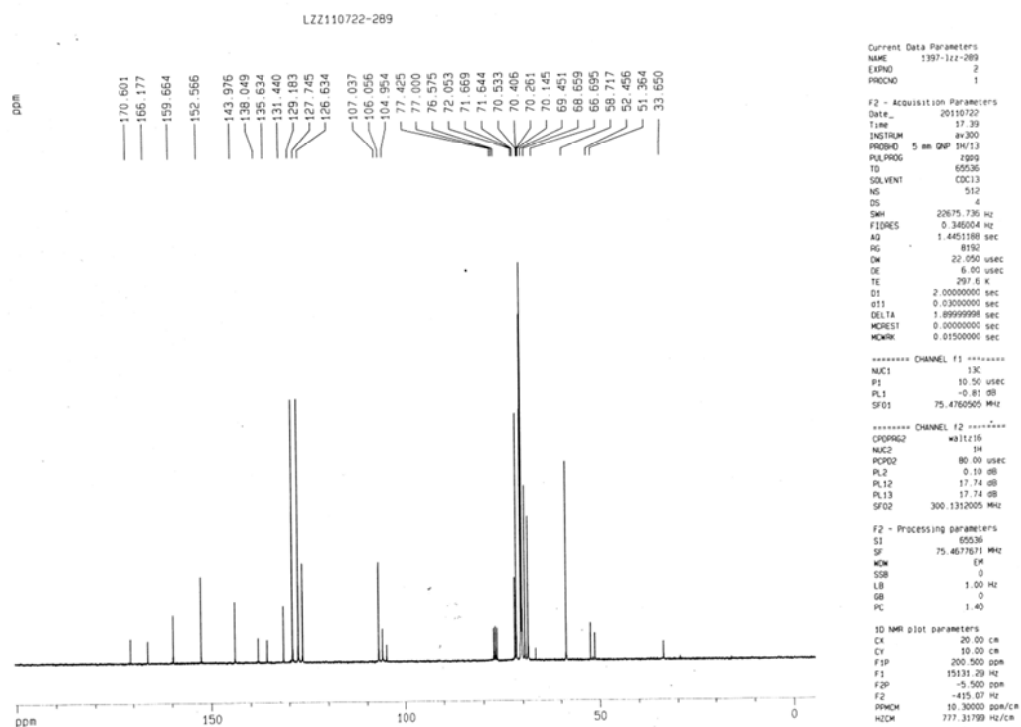

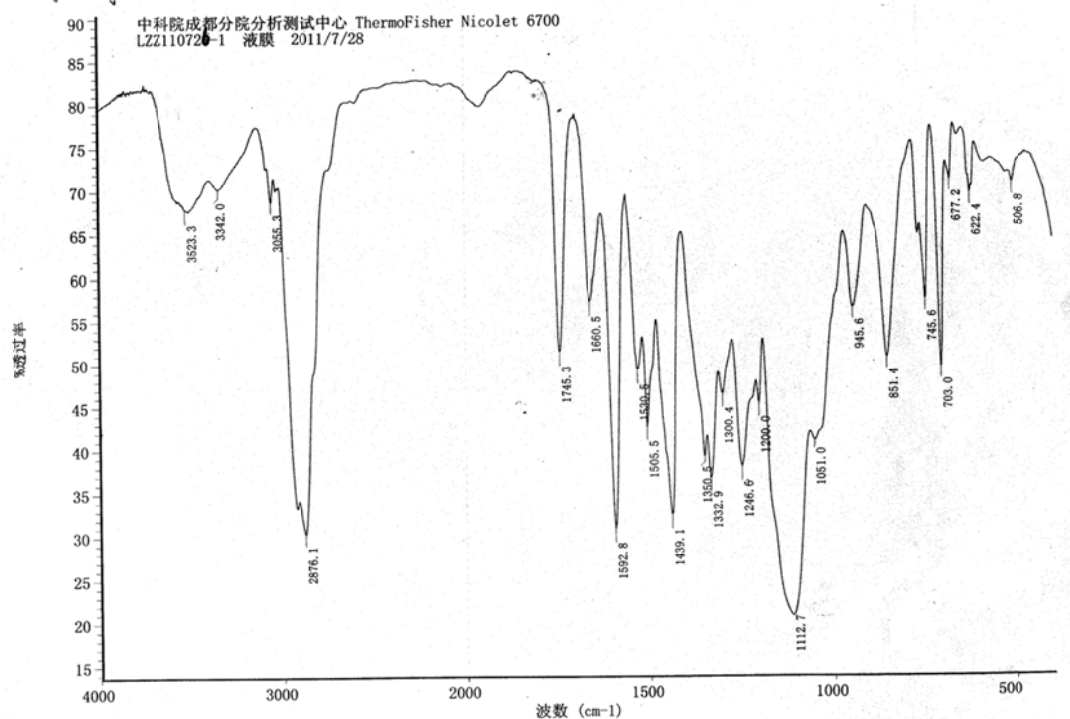

Mass Spectrum SmartFormula Report

|                      |                            |                                      |                     |
|----------------------|----------------------------|--------------------------------------|---------------------|
| <b>Analysis Info</b> |                            | Acquisition Date 8/2/2011 9:29:27 AM |                     |
| Analysis Name        | D:\Data\User\LZZ110726-7.d | Operator                             | Ma                  |
| Method               | WU_tune_low_20101108.m     | Instrument / Ser#                    | microTOF-Q II 10203 |
| Sample Name          | LZZ110726-7                |                                      |                     |
| Comment              |                            |                                      |                     |

|                              |            |                       |           |
|------------------------------|------------|-----------------------|-----------|
| <b>Acquisition Parameter</b> |            |                       |           |
| Source Type                  | ESI        | Ion Polarity          | Positive  |
| Focus                        | Not active | Set Capillary         | 4500 V    |
| Scan Begin                   | 50 m/z     | Set End Plate Offset  | -500 V    |
| Scan End                     | 3000 m/z   | Set Collision Cell RF | 150.0 Vpp |
|                              |            | Set Nebulizer         | 0.3 Bar   |
|                              |            | Set Dry Heater        | 180 °C    |
|                              |            | Set Dry Gas           | 4.0 l/min |
|                              |            | Set Divert Valve      | Source    |

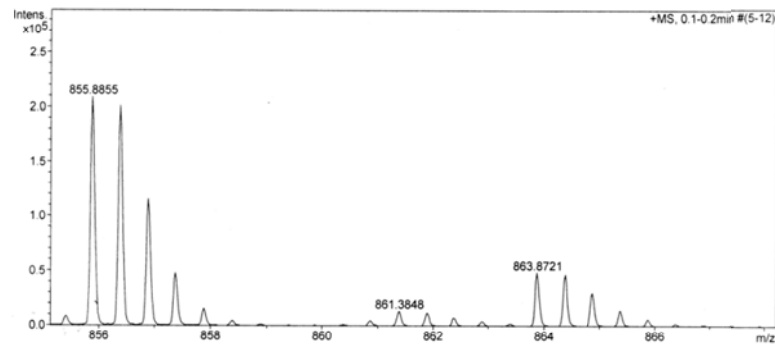

| Meas. m/z | # | Formula                  | Score  | m/z      | err [ppm] | Mean err [ppm] | mSig  | rdb  | e <sup>-</sup> Conf | N-Rule |
|-----------|---|--------------------------|--------|----------|-----------|----------------|-------|------|---------------------|--------|
| 855.8855  | 1 | C 86 H 123 N Na 2 O 29 S | 100.00 | 855.8843 | -1.5      | -0.5           | 8.9   | 25.0 | even                | ok     |
| 856.8878  | 1 | C 99 H 120 N Na O 21 S   | 100.00 | 856.8980 | 12.0      | 13.4           | 330.8 | 40.0 | even                | ok     |

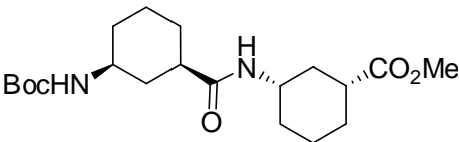

(6)

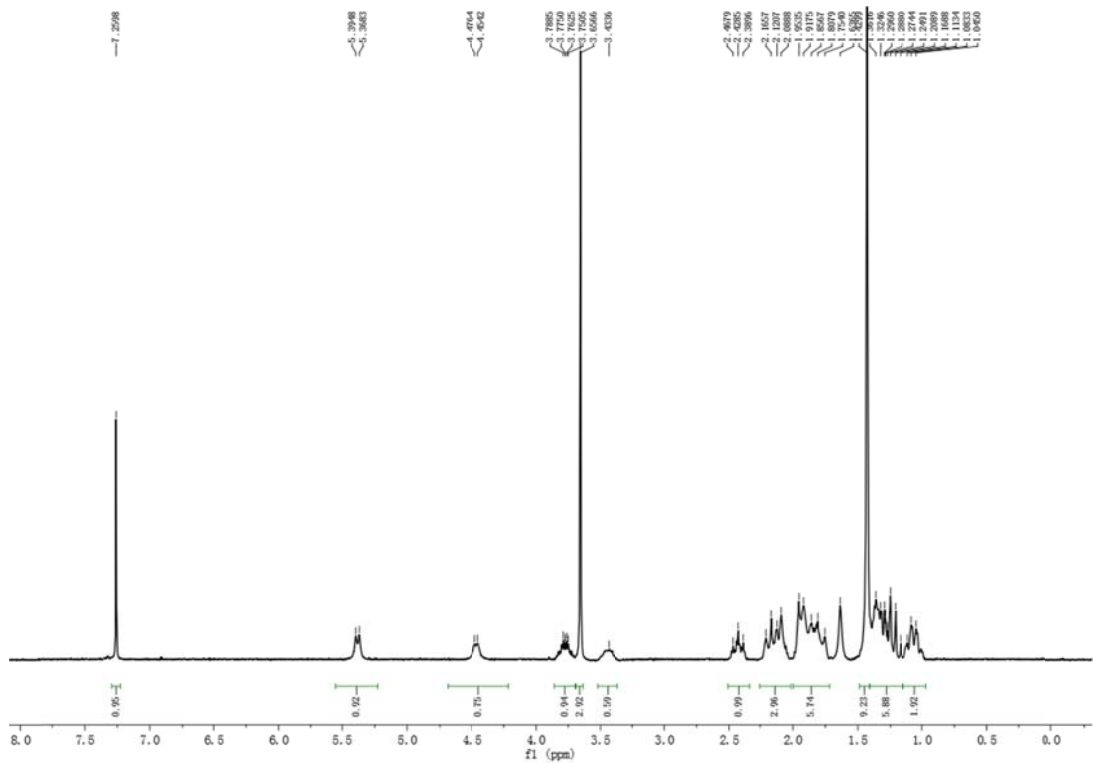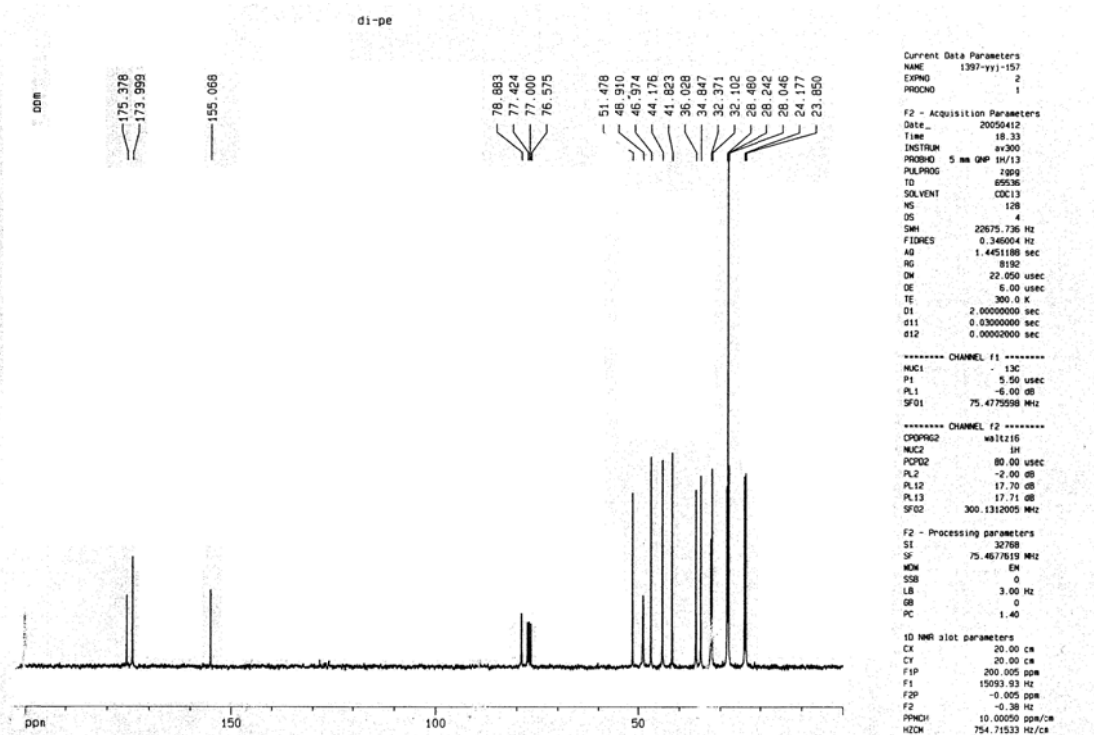

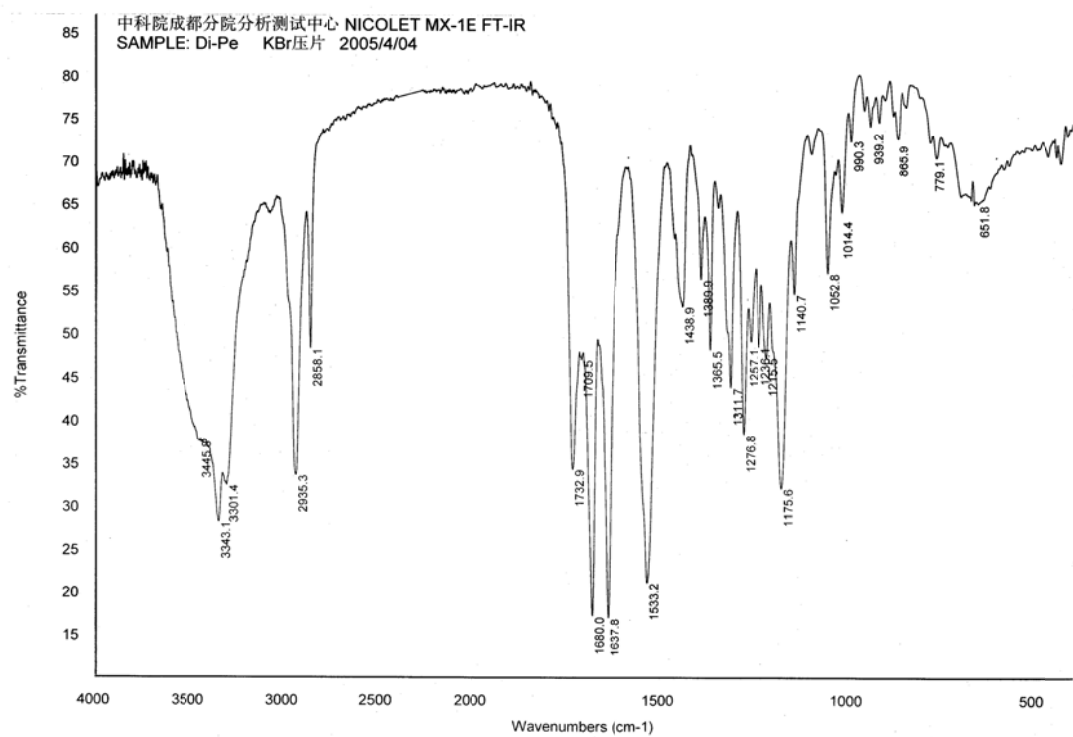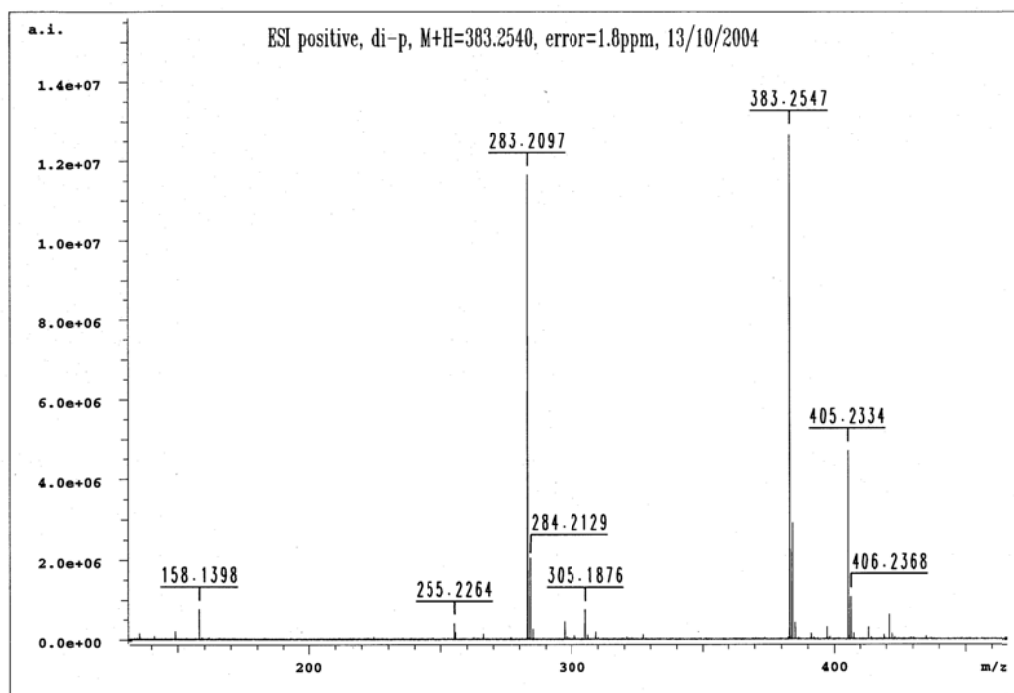

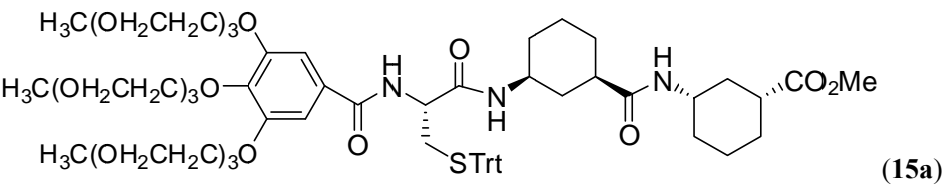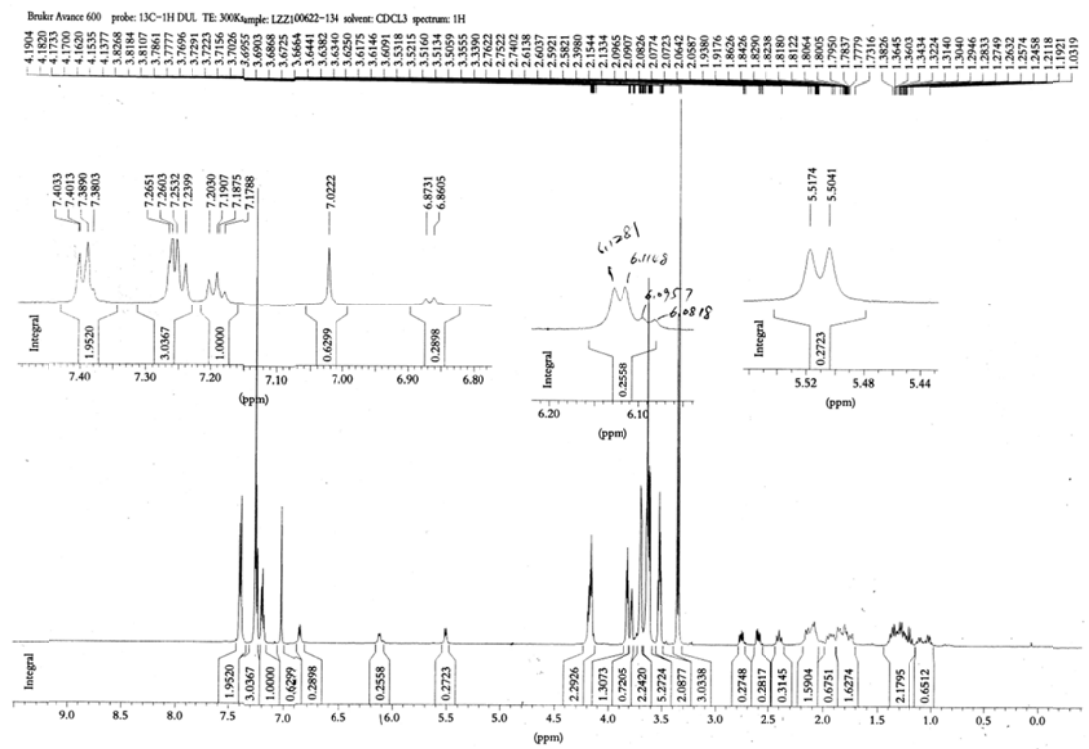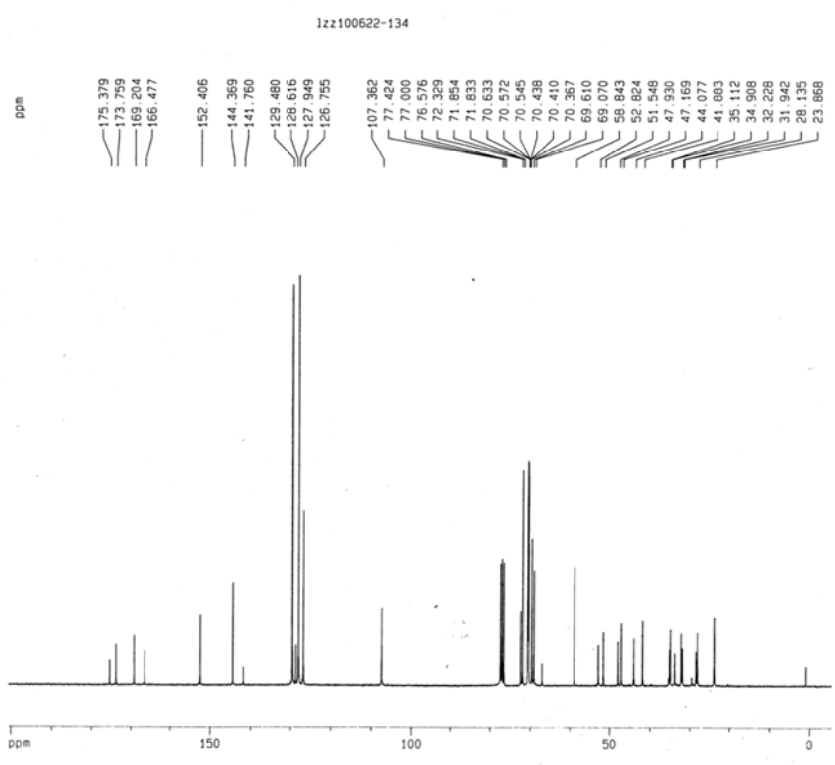

Current Data Parameters  
NAME 1397-122-134  
EXPNO 2  
PROCNO 1

F2 - Acquisition Parameters  
Date\_ 20100713  
Time 7.56  
INSTRUM mv300  
PROBHD 5 mm QNP 1H/13  
PULPROG zgpg30  
TD 65536  
SOLVENT DMSO  
NS 1438  
DS 4  
SWH 20675.736 KHz  
FIDRES 0.346004 KHz  
AQ 1.445188 sec  
RG 8192  
DN 22.050 usec  
DE 6.00 usec  
TE 301.0 K  
D1 2.00000000 sec  
d11 0.03000000 sec  
DELTA 1.80000000 sec  
MREST 0.00000000 sec  
MORPC 0.01500000 sec

\*\*\*\*\* CHANNEL f1 \*\*\*\*\*  
NUC1 13C  
P1 10.50 usec  
PL1 -0.81 dB  
SF01 75.477558 MHz

\*\*\*\*\* CHANNEL f2 \*\*\*\*\*  
CPOPRG2 mzgpg30  
NUC2 1H  
PCPD2 80.00 usec  
PL2 0.10 dB  
PL12 17.74 dB  
PL13 17.74 dB  
SF02 300.1352005 MHz

F2 - Processing parameters  
SI 65536  
SF 75.467758 MHz  
WDW EM  
SSB 0  
LB 1.00 KHz  
GB 0  
PC 1.40

1D NMR plot parameters  
CX 20.00 cm  
CY 10.00 cm  
FID 200.500 ppm  
F1 15131.21 KHz  
F2P -5.500 ppm  
F2 -415.07 KHz  
FREQH 777.31793 KHz/cm

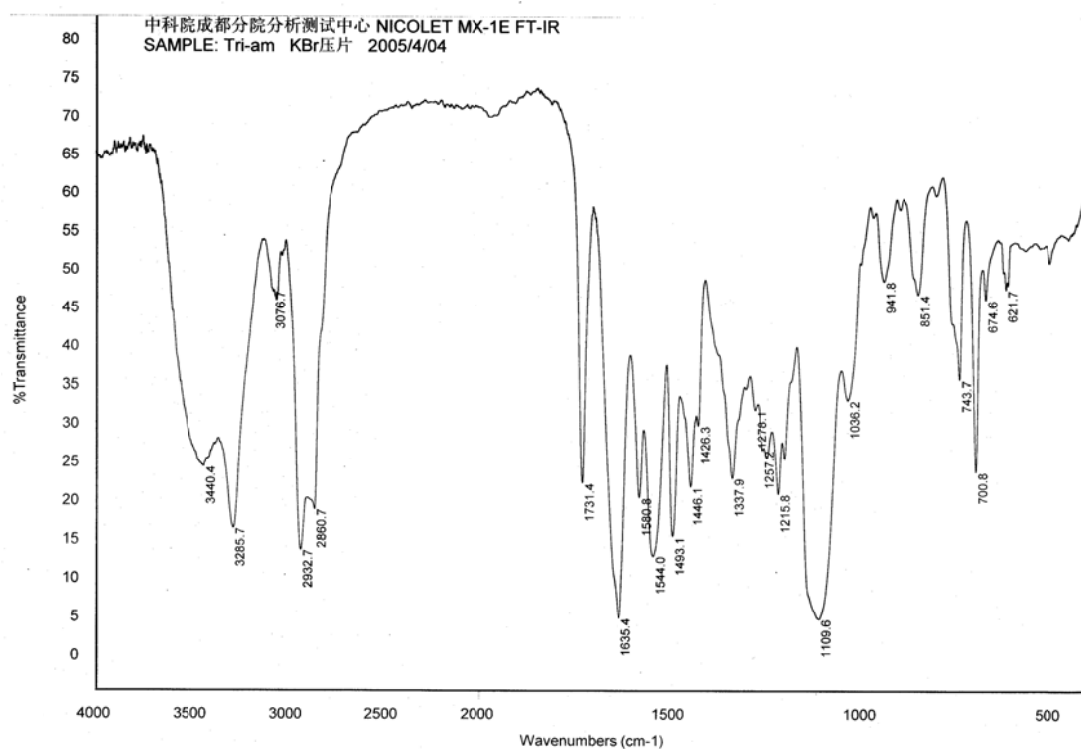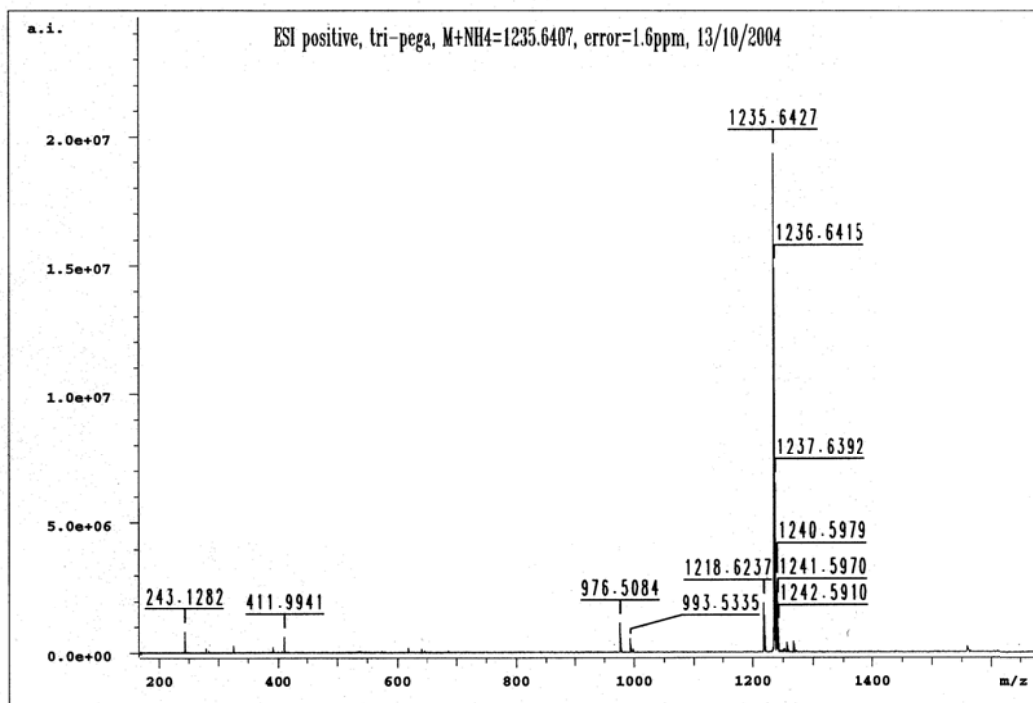

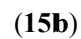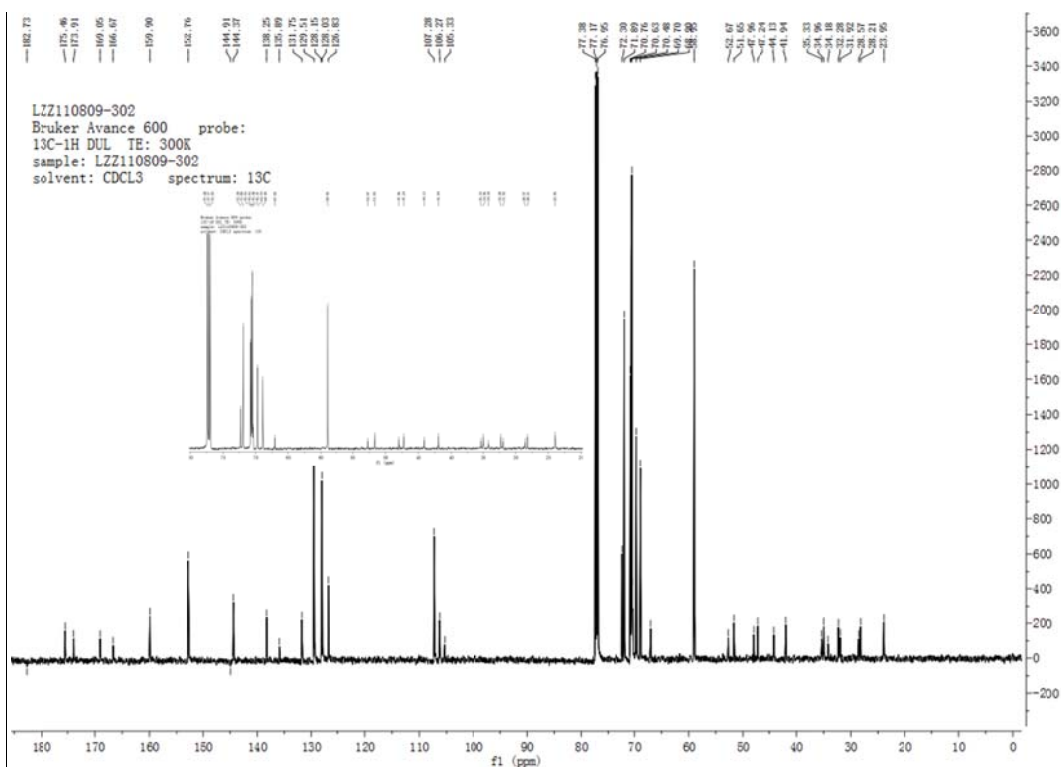

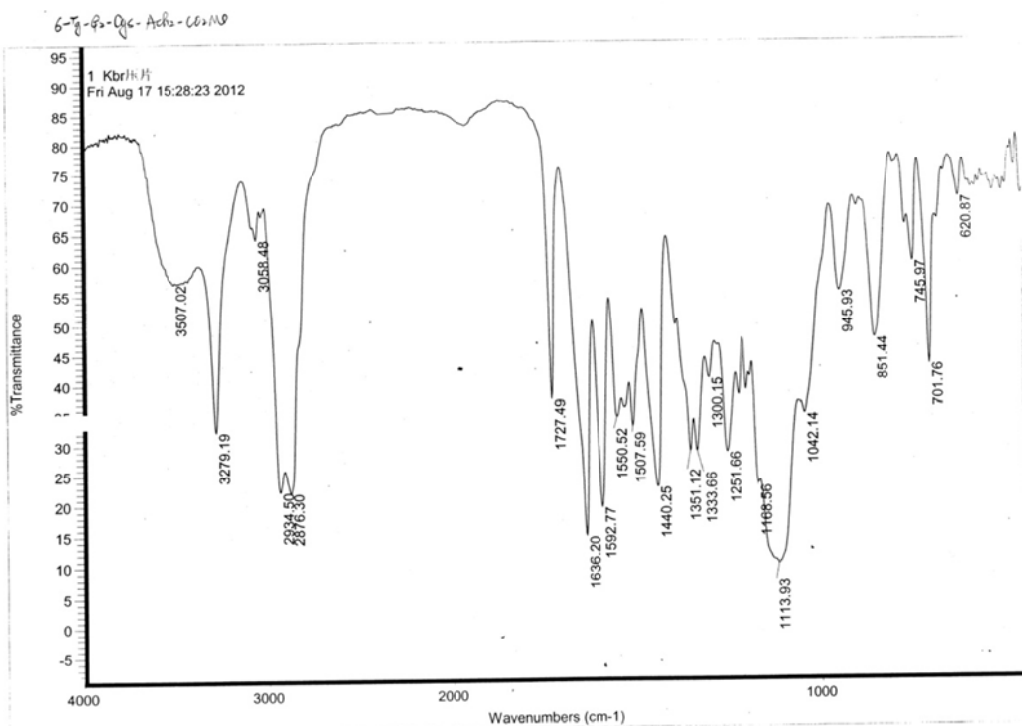

## Mass Spectrum SmartFormula Report

### Analysis Info

Analysis Name D:\Data\User\LZZ110721-6.d

|        |                        |
|--------|------------------------|
| Method | WU_tune_low_20101108.m |
|--------|------------------------|

Sample Name LZZ110721-6

Comment

Acquisition Date 8/2/2011 9:28:00 AM

| Operator | Ma  |
|----------|-----|
| 1        | 1   |
| 2        | 2   |
| 3        | 3   |
| 4        | 4   |
| 5        | 5   |
| 6        | 6   |
| 7        | 7   |
| 8        | 8   |
| 9        | 9   |
| 10       | 10  |
| 11       | 11  |
| 12       | 12  |
| 13       | 13  |
| 14       | 14  |
| 15       | 15  |
| 16       | 16  |
| 17       | 17  |
| 18       | 18  |
| 19       | 19  |
| 20       | 20  |
| 21       | 21  |
| 22       | 22  |
| 23       | 23  |
| 24       | 24  |
| 25       | 25  |
| 26       | 26  |
| 27       | 27  |
| 28       | 28  |
| 29       | 29  |
| 30       | 30  |
| 31       | 31  |
| 32       | 32  |
| 33       | 33  |
| 34       | 34  |
| 35       | 35  |
| 36       | 36  |
| 37       | 37  |
| 38       | 38  |
| 39       | 39  |
| 40       | 40  |
| 41       | 41  |
| 42       | 42  |
| 43       | 43  |
| 44       | 44  |
| 45       | 45  |
| 46       | 46  |
| 47       | 47  |
| 48       | 48  |
| 49       | 49  |
| 50       | 50  |
| 51       | 51  |
| 52       | 52  |
| 53       | 53  |
| 54       | 54  |
| 55       | 55  |
| 56       | 56  |
| 57       | 57  |
| 58       | 58  |
| 59       | 59  |
| 60       | 60  |
| 61       | 61  |
| 62       | 62  |
| 63       | 63  |
| 64       | 64  |
| 65       | 65  |
| 66       | 66  |
| 67       | 67  |
| 68       | 68  |
| 69       | 69  |
| 70       | 70  |
| 71       | 71  |
| 72       | 72  |
| 73       | 73  |
| 74       | 74  |
| 75       | 75  |
| 76       | 76  |
| 77       | 77  |
| 78       | 78  |
| 79       | 79  |
| 80       | 80  |
| 81       | 81  |
| 82       | 82  |
| 83       | 83  |
| 84       | 84  |
| 85       | 85  |
| 86       | 86  |
| 87       | 87  |
| 88       | 88  |
| 89       | 89  |
| 90       | 90  |
| 91       | 91  |
| 92       | 92  |
| 93       | 93  |
| 94       | 94  |
| 95       | 95  |
| 96       | 96  |
| 97       | 97  |
| 98       | 98  |
| 99       | 99  |
| 100      | 100 |

Instrument / Ser#    micrOTOF-Q II 10203

### Acquisition Parameter

|             |     |
|-------------|-----|
| Source Type | ESI |
|-------------|-----|

|             |            |
|-------------|------------|
| Source type | EOI        |
| Focus       | Not active |
| Open Period | 52 weeks   |

|            |          |
|------------|----------|
| Scan Begin | 50 m/z   |
| Scan End   | 3000 m/z |

|              |          |
|--------------|----------|
| Ion Polarity | Positive |
|--------------|----------|

|               |          |
|---------------|----------|
| Ion Polarity  | Positive |
| Set Capillary | 4500 V   |
| Set Exit Time | 0.00 min |

|                       |            |
|-----------------------|------------|
| Set End Plate Offset  | -500 V     |
| Set Collision Cell RE | 150.0 V/cm |

Set Nebulizer 0.3 Bar

|                |         |
|----------------|---------|
| Set Nebulizer  | 0.3 Bar |
| Set Dry Heater | 180 °C  |

|                  |           |
|------------------|-----------|
| Set Dry Heater   | 100 °C    |
| Set Dry Gas      | 4.0 l/min |
| Set Divert Valve | Source    |

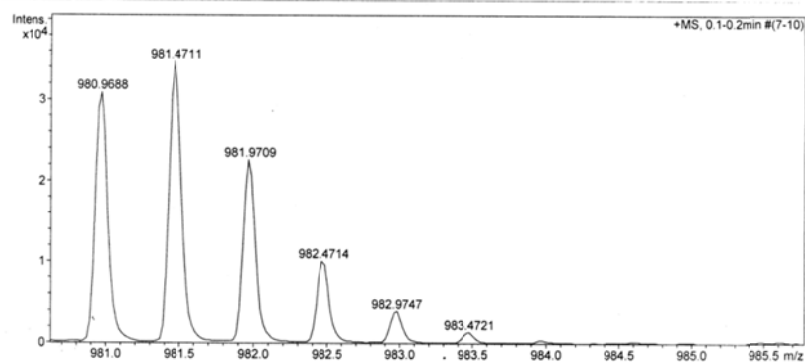

| Meas.<br>m/z | # | Formula                     | Score  | m/z      | err<br>[ppm] | Mean<br>err<br>[ppm] | mSigma | rdb  | e <sup>-</sup><br>Conf | N-<br>R<br>ul<br>e |
|--------------|---|-----------------------------|--------|----------|--------------|----------------------|--------|------|------------------------|--------------------|
| √980.9688    | 1 | C 100 H 145 N 3 Na 2 O 31 S | 100.00 | 980.9684 | -0.4         | -0.1                 | 9.9    | 29.0 | even                   | ok                 |
| 981.4711     | 1 | C 100 H 146 N 3 Na 2 O 31 S | 100.00 | 981.4723 | 1.2          | 2.4                  | 228.9  | 28.5 | odd                    | ok                 |

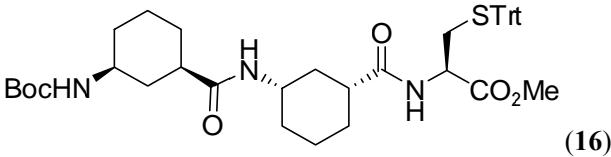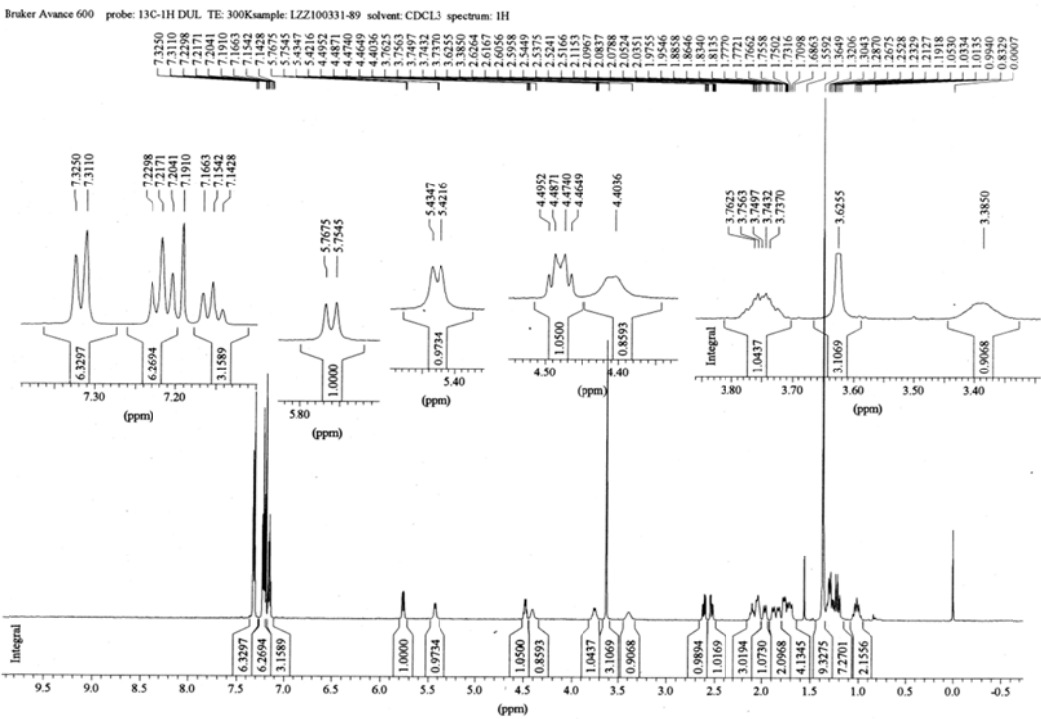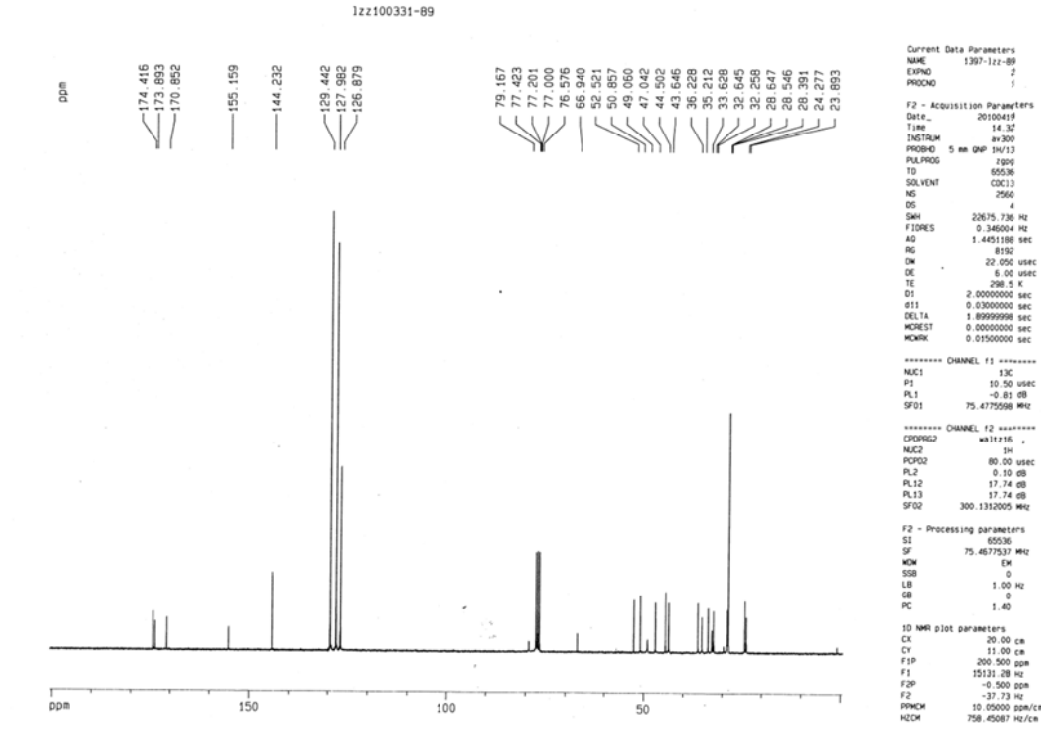

Current Data Parameters  
NAME 1397-122-89  
EXPNO 1  
PROCNO 1

F2 - Acquisition Parameters  
Date\_ 20100409  
Time 14.32  
INSTRUM spect  
PROBHD 5 mm QNP 1H/13  
PULPROG zgpg  
TD 65536  
SOLVENT CDCl3  
NS 2560  
DS 4  
SWH 22615.738 Hz  
FIDRES 0.346004 Hz  
AQ 1.4451186 sec  
RG 8192  
DW 22.056 usec  
DE 6.00 usec  
TE 298.2 K  
D1 2.00000000 sec  
d11 0.03000000 sec  
DELTA 1.89999999 sec  
MCKEST 0.00000000 sec  
MCKR 0.01500000 sec

\*\*\*\*\* CHANNEL f1 \*\*\*\*\*  
NUC1 13C  
P1 10.50 usec  
PL1 -0.81 dB  
SFO1 75.4775980 MHz

\*\*\*\*\* CHANNEL f2 \*\*\*\*\*  
CPDPRG2 waltz16  
NUC2 1H  
PCPD2 80.00 usec  
PL2 0.10 dB  
PL12 17.74 dB  
PL13 17.74 dB  
SFO2 300.1312005 MHz

F2 - Processing parameters  
SI 65536  
SF 75.4677537 MHz  
WDW EM  
SSB 0  
LB 1.00 Hz  
GB 0  
PC 1.40

1D NMR plot parameters  
CX 20.00 cm  
CY 15.00 cm  
F1P 200.500 ppm  
F1 10131.28 Hz  
F2P -0.500 ppm  
F2 -37.73 Hz  
PPHMC 10.05000 ppm/cm  
HZCM 758.45087 Hz/cm

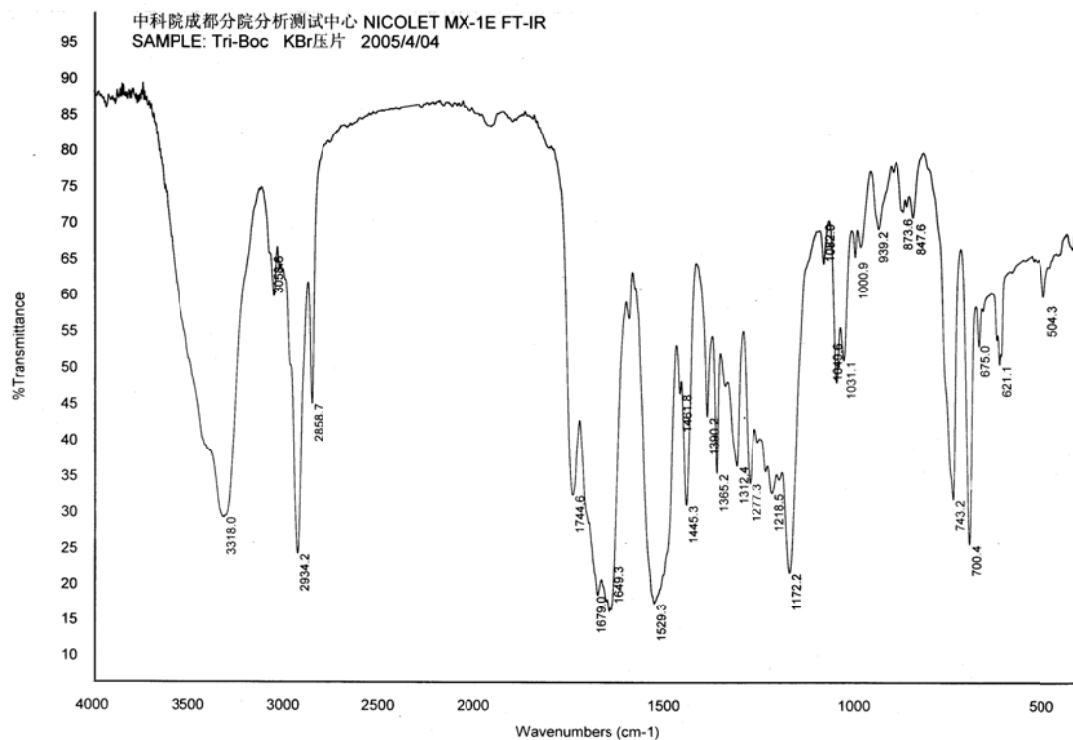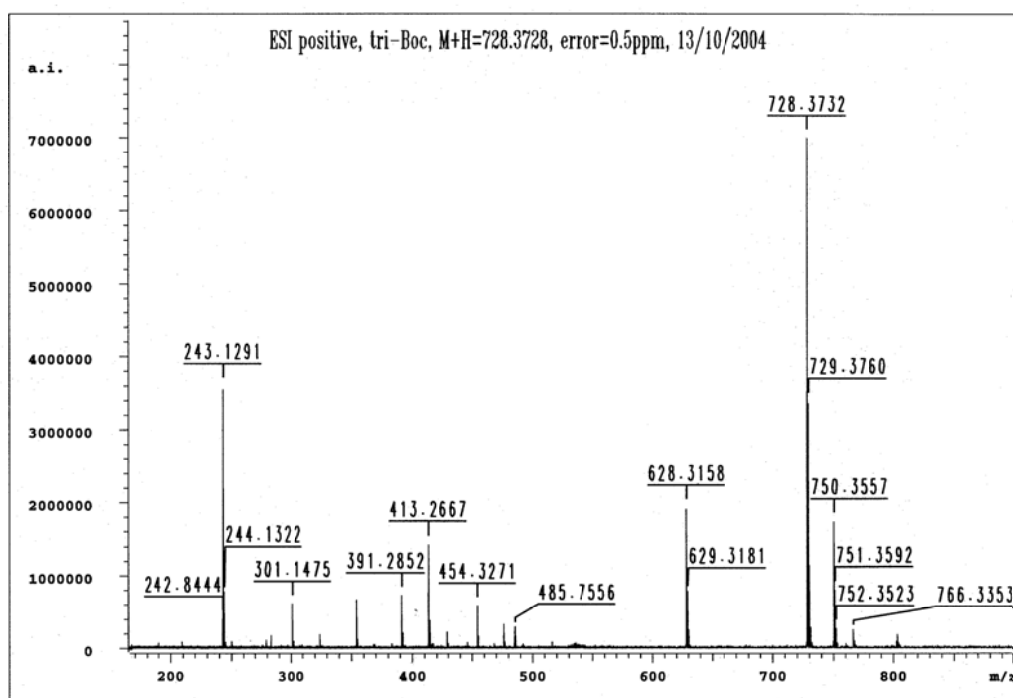

/u/data/TRAINING/yangyujin1013/2/pdata/1 xspec Thu Oct 14 16:35:40 2004

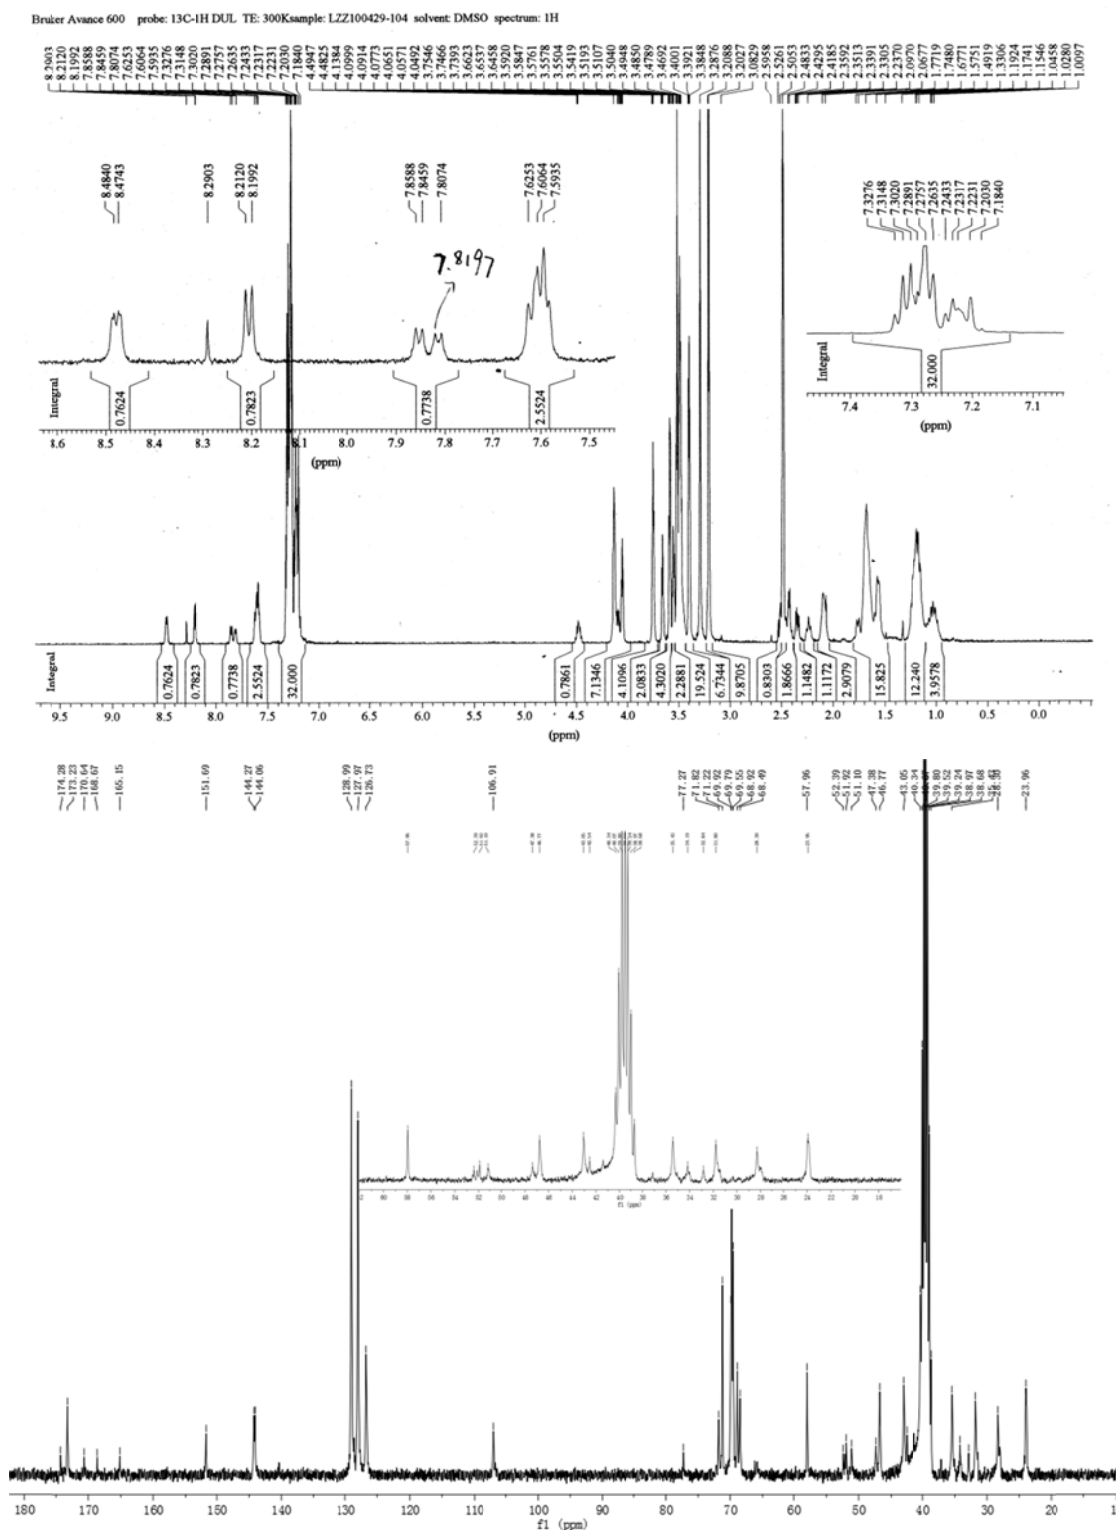

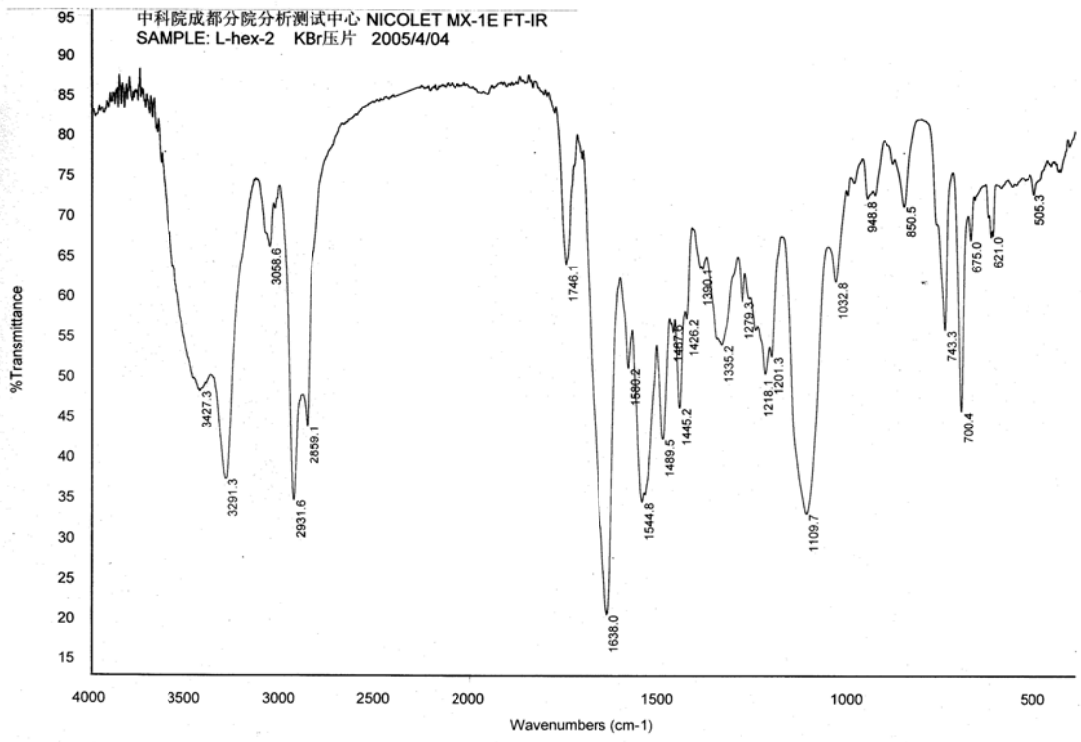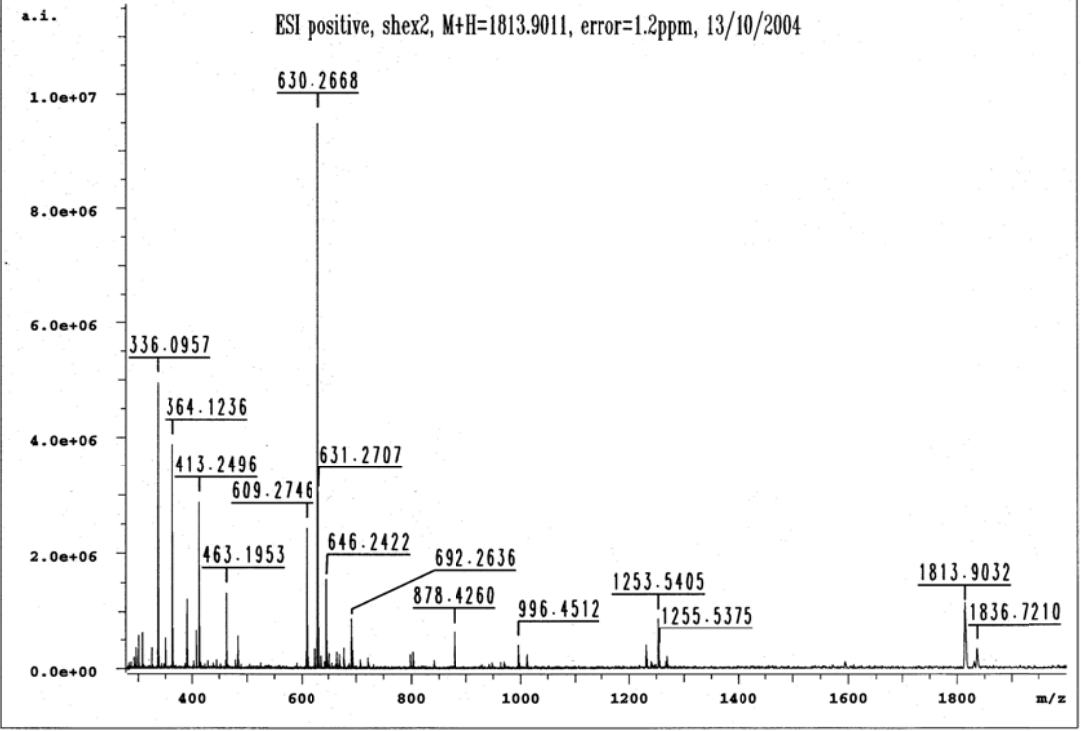

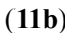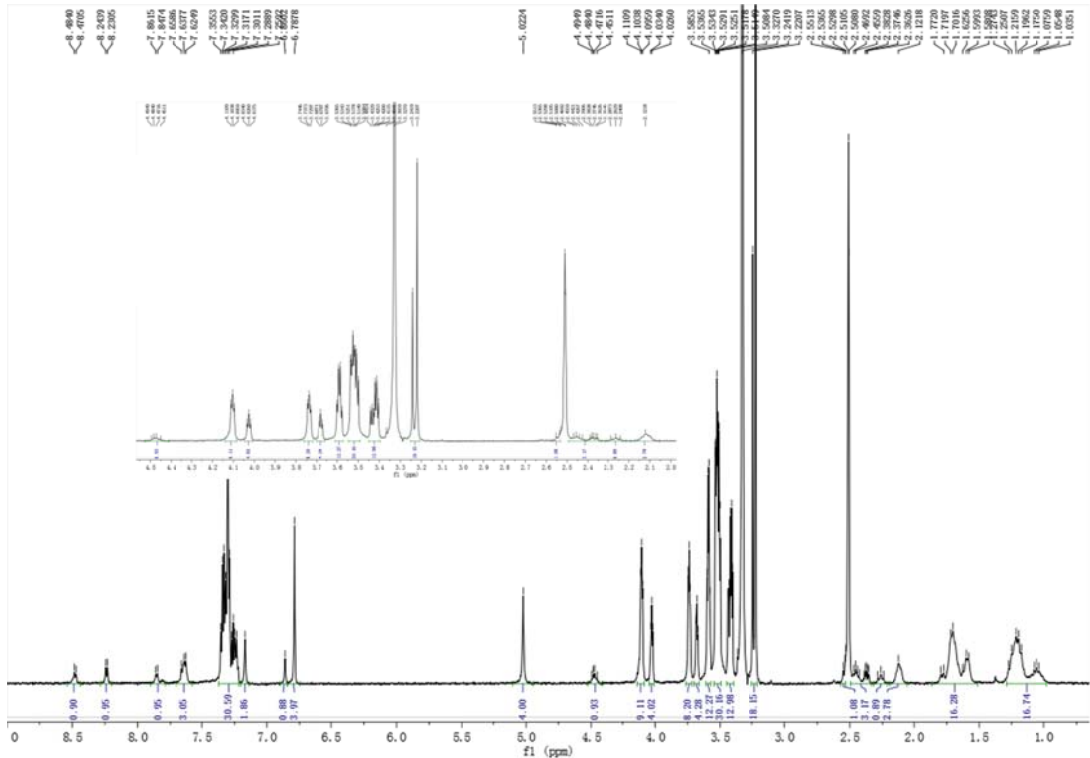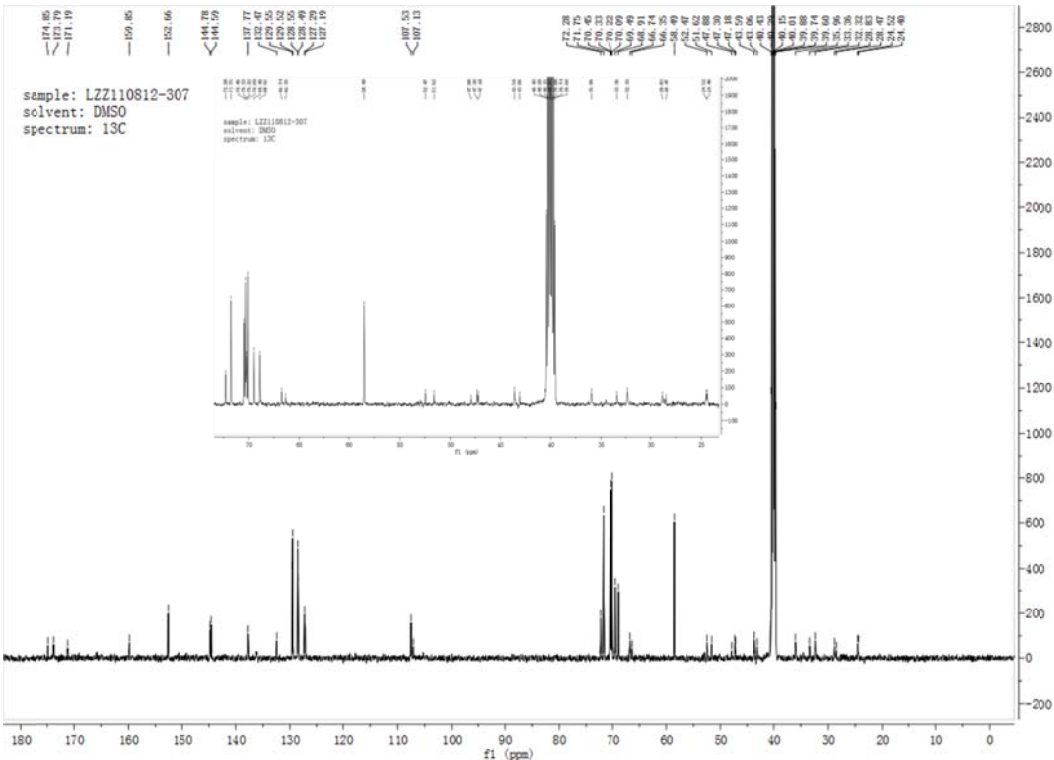

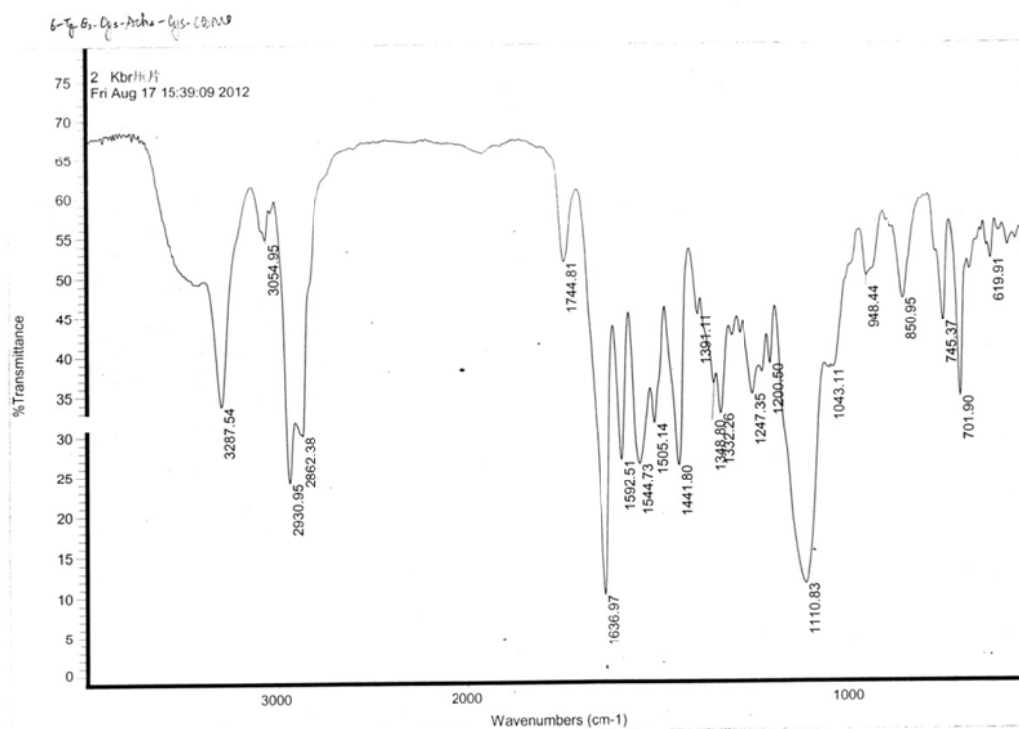

## Mass Spectrum SmartFormula Report

### Analysis Info

Analysis Name D:\Data\User\LZZ110807-10-2.d  
Method tune\_wide\_20110309.m  
Sample Name LZZ110807-10-2  
Comment

Acquisition Date 9/5/2011 9:24:51 AM

Operator Ma  
Instrument / Ser# micrOTOF-Q II 10203

### Acquisition Parameter

|             |          |                       |           |                  |           |
|-------------|----------|-----------------------|-----------|------------------|-----------|
| Source Type | ESI      | Ion Polarity          | Positive  | Set Nebulizer    | 0.3 Bar   |
| Focus       | Active   | Set Capillary         | 4500 V    | Set Dry Heater   | 180 °C    |
| Scan Begin  | 50 m/z   | Set End Plate Offset  | -500 V    | Set Dry Gas      | 4.0 l/min |
| Scan End    | 3000 m/z | Set Collision Cell RF | 550.0 Vpp | Set Divert Valve | Source    |

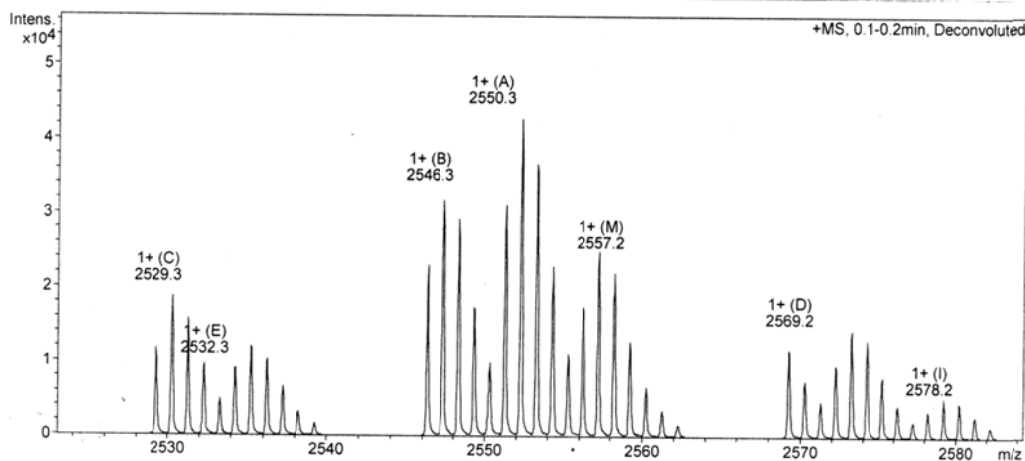

| Meas. m/z | # | Formula | Score | m/z    | err [ppm] | Mean err [ppm] | mSigma | rdb | e <sup>-</sup> Conf | N-Rule |
|-----------|---|---------|-------|--------|-----------|----------------|--------|-----|---------------------|--------|
| 2529.3    | 1 | C       |       | 2529.3 |           |                |        |     |                     |        |
| 2532.3    | 1 | E       |       | 2532.3 |           |                |        |     |                     |        |
| 2546.3    | 1 | B       |       | 2546.3 |           |                |        |     |                     |        |
| 2550.3    | 1 | A       |       | 2550.3 |           |                |        |     |                     |        |
| 2557.2    | 1 | M       |       | 2557.2 |           |                |        |     |                     |        |
| 2569.2    | 1 | D       |       | 2569.2 |           |                |        |     |                     |        |
| 2578.2    | 1 | I       |       | 2578.2 |           |                |        |     |                     |        |



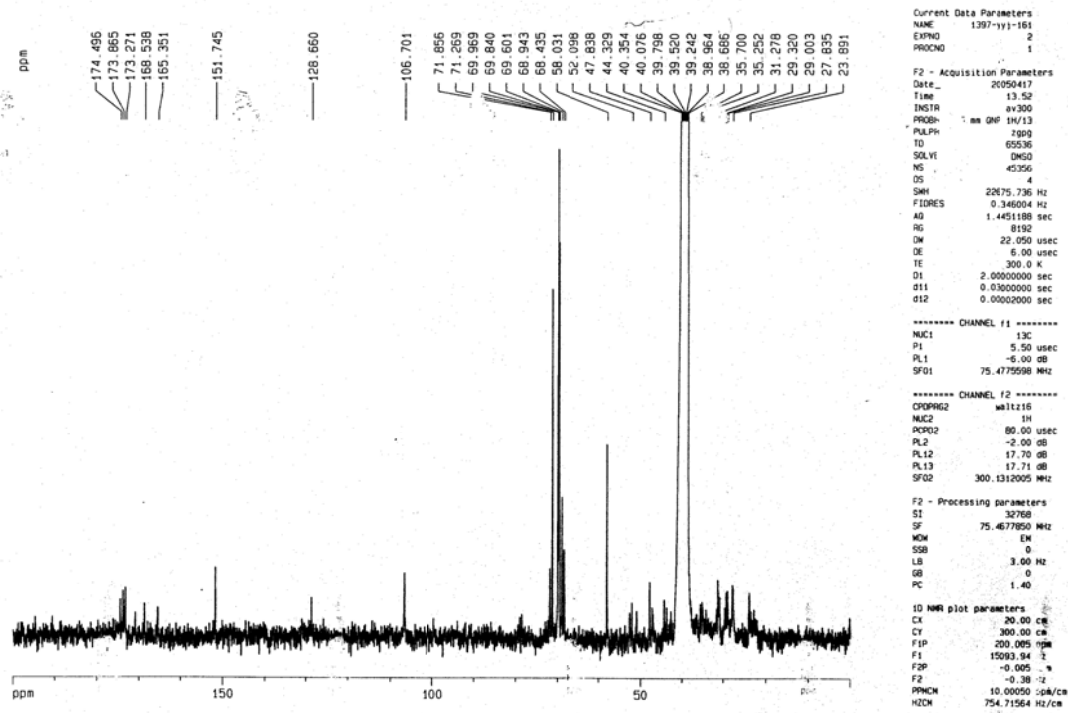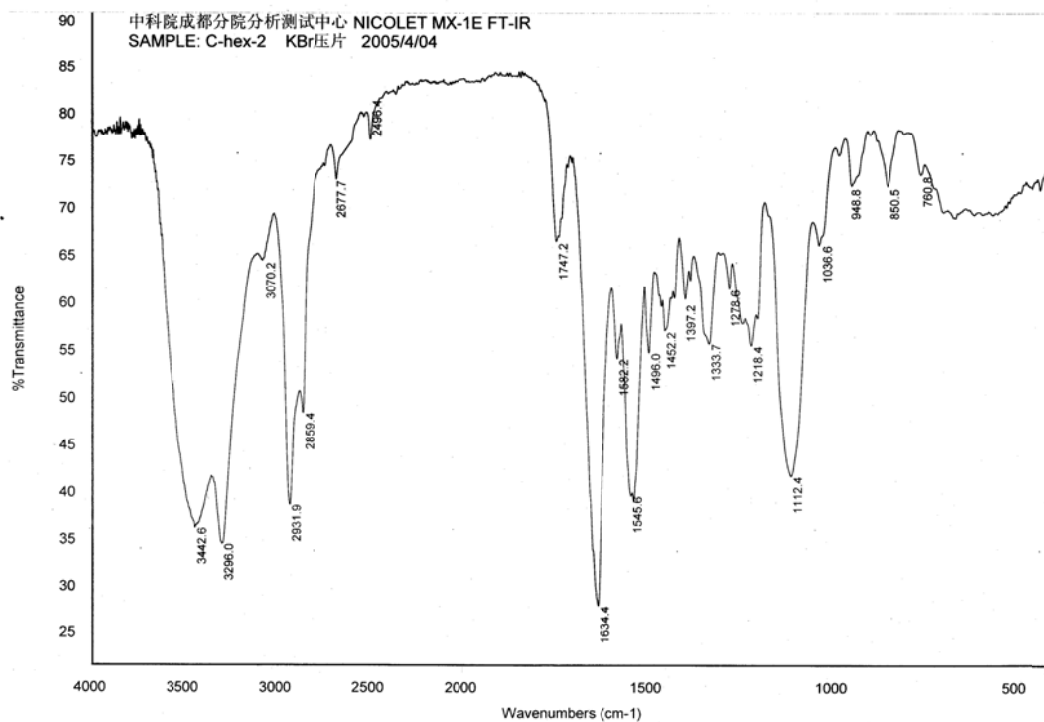

D:\Data\_IC\2010\10-05\20100525\201005252510\_B911

printed: 5/25/2010 5:24:00 PM

## MALDI-TOF,CCA,1,2010,05,18

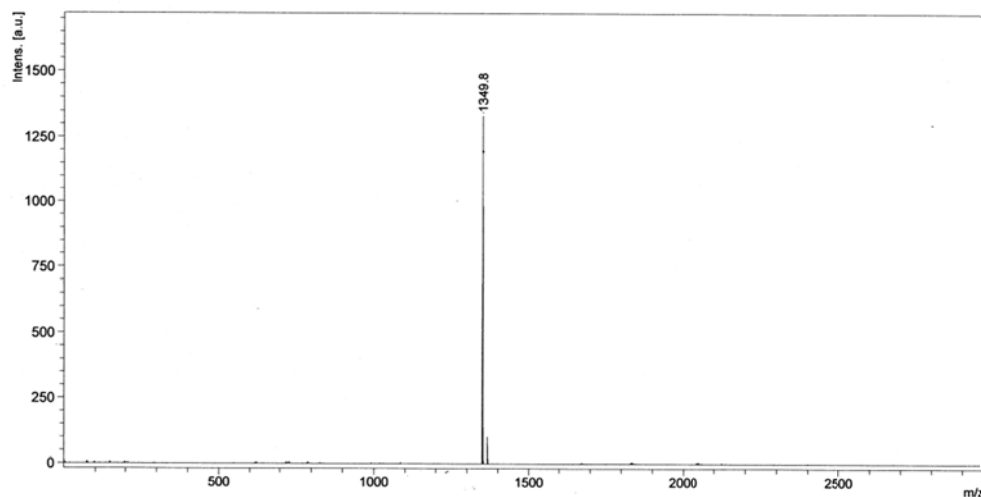

### Mass Spectrum SmartFormula Report

|                      |                            |                   |                      |
|----------------------|----------------------------|-------------------|----------------------|
| <b>Analysis Info</b> |                            | Acquisition Date  | 11/3/2010 3:12:16 PM |
| Analysis Name        | D:\Data\User\lzz101101-2.d | Operator          | Ma                   |
| Method               | tune_wide_20101102.m       | Instrument / Ser# | micrOTOF-Q II 10203  |
| Sample Name          | lzz101101-2                |                   |                      |
| Comment              | 1:100 Dilution             |                   |                      |

|                              |          |                       |           |                  |           |
|------------------------------|----------|-----------------------|-----------|------------------|-----------|
| <b>Acquisition Parameter</b> |          | Ion Polarity          | Positive  | Set Nebulizer    | 0.3 Bar   |
| Source Type                  | ESI      | Set Capillary         | 4500 V    | Set Dry Heater   | 180 °C    |
| Focus                        | Active   | Set End Plate Offset  | -500 V    | Set Dry Gas      | 4.0 l/min |
| Scan Begin                   | 50 m/z   | Set Collision Cell RF | 600.0 Vpp | Set Divert Valve | Source    |
| Scan End                     | 3000 m/z |                       |           |                  |           |

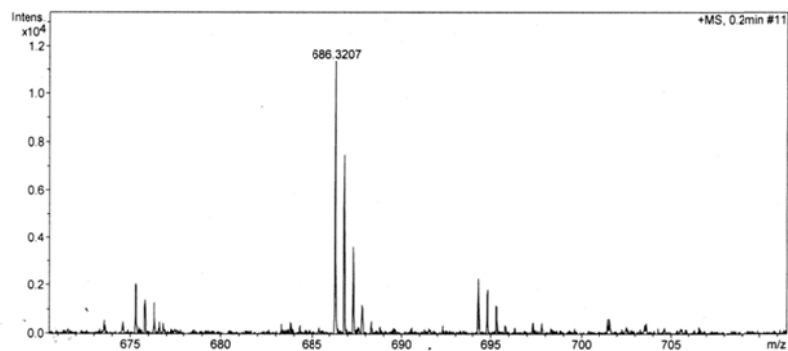

| Meas. #  | Formula                        | Score  | m/z      | err [ppm] | Me an err [ppm] | mSig ma | rdb  | e <sup>-</sup> Conf | N-R ul e |
|----------|--------------------------------|--------|----------|-----------|-----------------|---------|------|---------------------|----------|
| 686.3207 | 1 C 56 H 106 N 6 Na 2 O 25 S 2 | 100.00 | 686.3217 | 1.4       | 3.0             | 67.7    | 6.0  | even                | ok       |
|          | 2 C 63 H 102 N 6 Na 2 O 20 S 2 | 27.06  | 686.3187 | -2.9      | -1.3            | 83.3    | 15.0 | even                | ok       |
|          | 3 C 81 H 94 N 6 Na 2 O 7 S 2   | 0.58   | 686.3205 | -0.4      | 1.3             | 169.0   | 37.0 | even                | ok       |

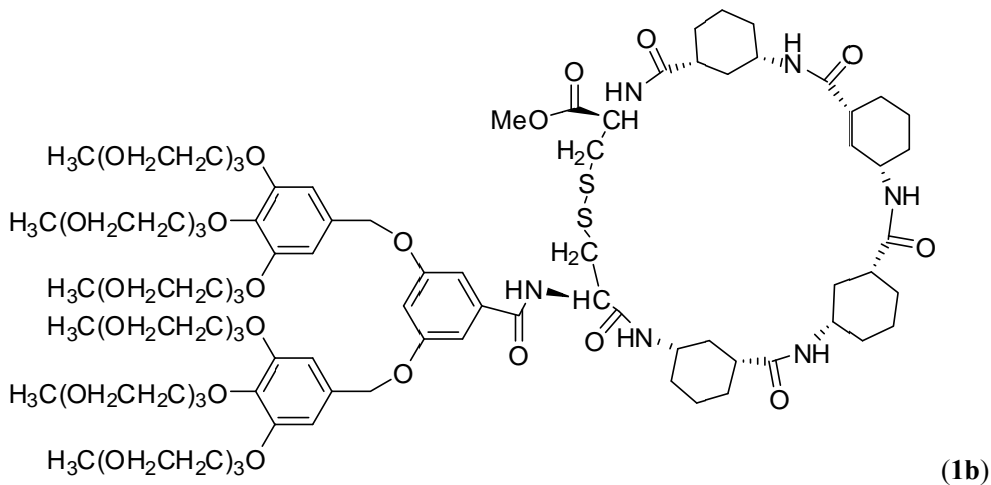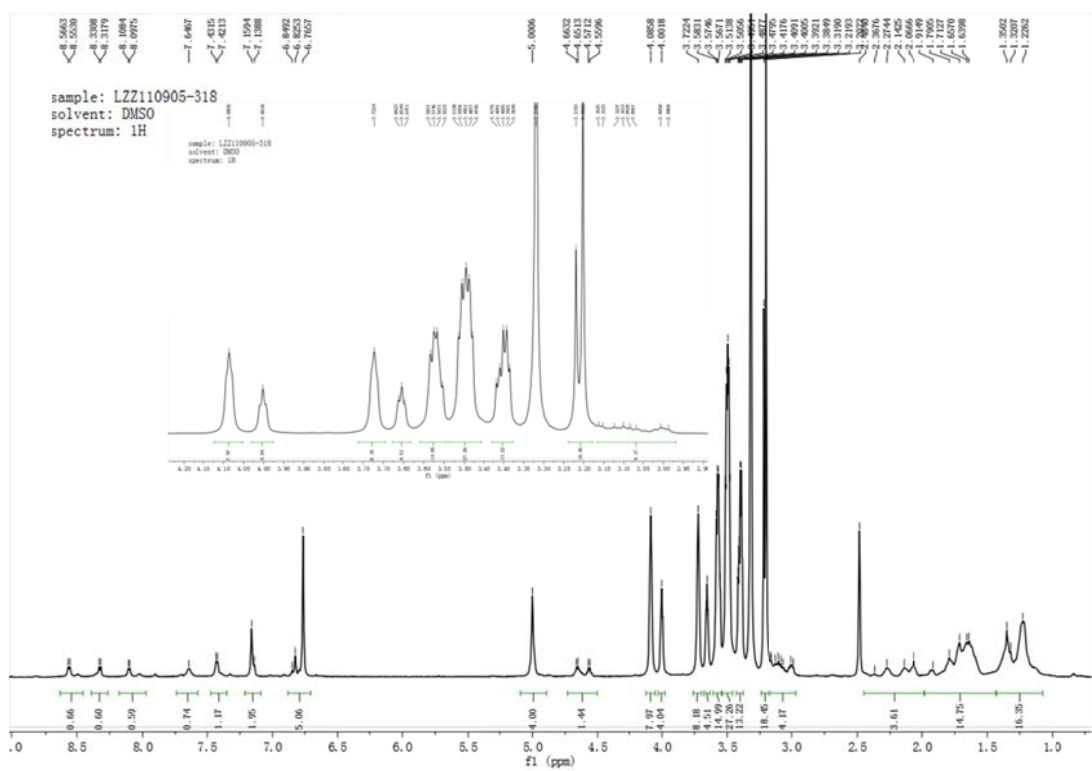

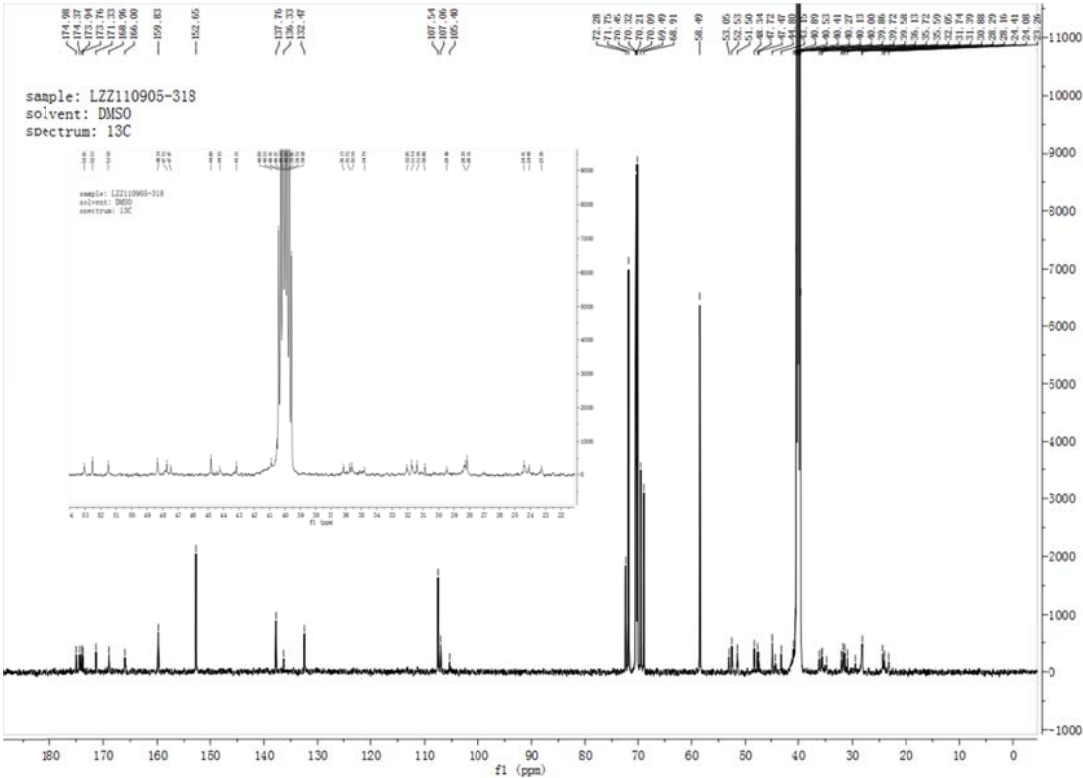

Mass Spectrum SmartFormula Report

|                              |                             |                                      |                     |
|------------------------------|-----------------------------|--------------------------------------|---------------------|
| <b>Analysis Info</b>         |                             | Acquisition Date 9/5/2011 9:30:14 AM |                     |
| Analysis Name                | D:\Data\User\LZZ110807-11.d | Operator                             | Ma                  |
| Method                       | tune_wide_20110309.m        | Instrument / Ser#                    | micrOTOF-Q II 10203 |
| Sample Name                  | LZZ110807-11                |                                      |                     |
| Comment                      |                             |                                      |                     |
| <b>Acquisition Parameter</b> |                             |                                      |                     |
| Source Type                  | ESI                         | Ion Polarity                         | Positive            |
| Focus                        | Active                      | Set Capillary                        | 4500 V              |
| Scan Begin                   | 50 m/z                      | Set End Plate Offset                 | -500 V              |
| Scan End                     | 3000 m/z                    | Set Collision Cell RF                | 550.0 Vpp           |
|                              |                             | Set Nebulizer                        | 0.3 Bar             |
|                              |                             | Set Dry Heater                       | 180 °C              |
|                              |                             | Set Dry Gas                          | 4.0 l/min           |
|                              |                             | Set Divert Valve                     | Source              |

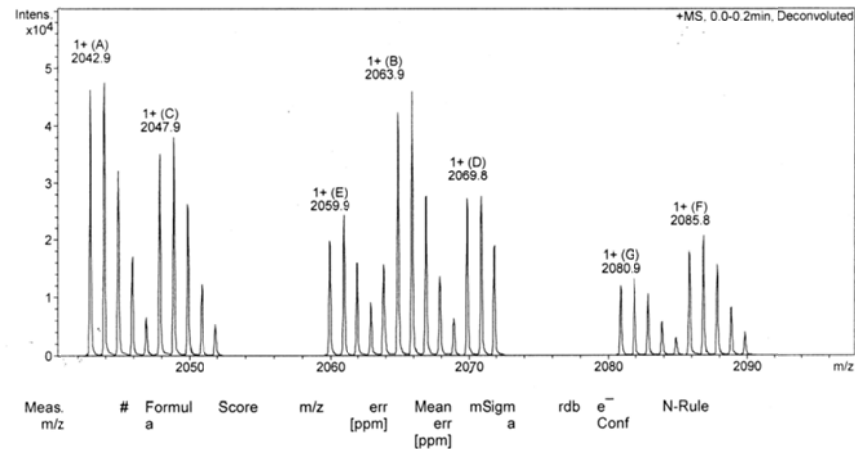

D:\Data\_IC\20111111-08\20110826\201108261910\_K2311

printed: 8/26/2011 3:44:27 PM

## MALDI-TOF,CCA,LZZ110819-9,2011,08,25

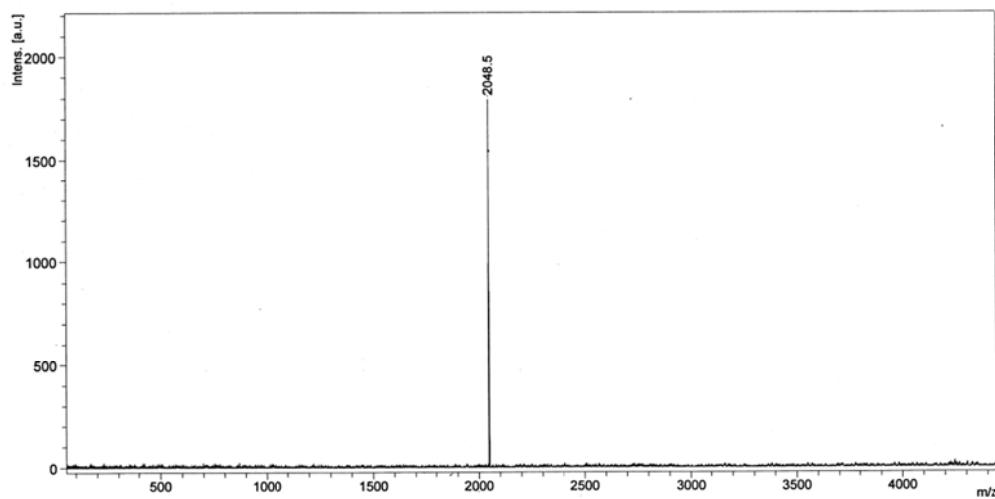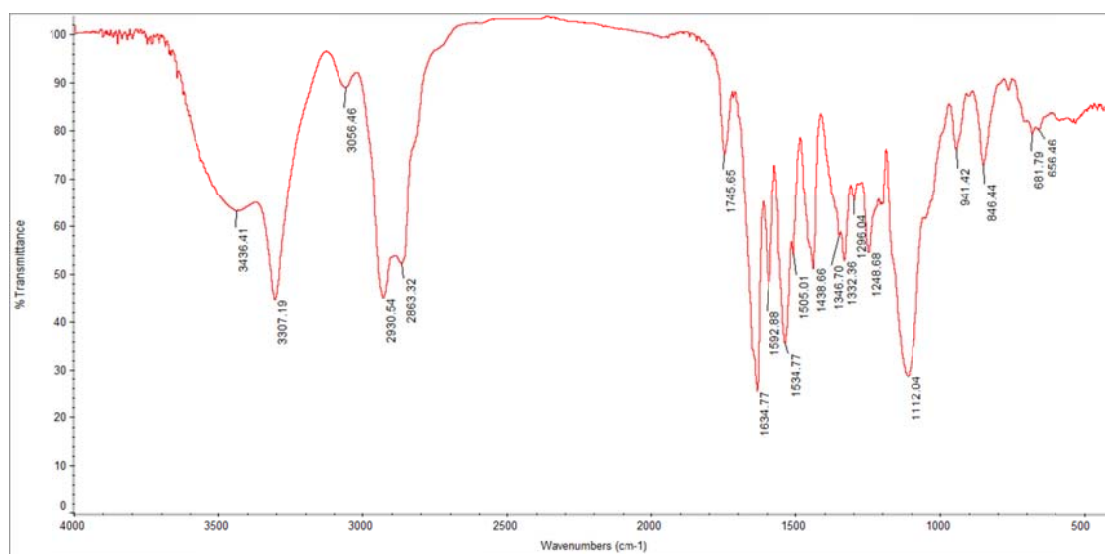

## 9. References:

1. Y. Hu, S. L. Yu, Y. J. Yang, J. Zhu and J. G. Deng, *Chin. J. Chem.*, 2006, **24**, 795-799.
2. L. Xu, L. Shao, L. Chen, M. Hu and Y. Bi, *Chem. Lett.*, 2010, **39**, 1177-1179.
3. J. Rudolph, H. Theis, R. Hanke, R. Endermann, L. Johannsen and F.-U. Geschke, *J. Med. Chem.*, 2001, **44**, 619-626.
